# Supplementary material for: TD-DFT benchmark for UV-visible spectra of fused-ring electron acceptors using global and range-separated hybrids
Source: Royal Society of Chemistry journal article supplement (doi:10.1039/d0cp00060d), 2020-01-01
Supplement: d0cp00060d1.pdf [file d0cp00060d1.pdf]

## †Electronic Supporting Information

# TD-DFT benchmark for UV-visible spectra of fused- ring electron acceptors applying global and range- separated hybrids

*Amjad Ali, Muhammad Imran Rafiq, Zhuohan Zhang, Jinru Cao, Renyong Geng, Baojing*

*Zhou,\*\* and Weihua Tang\**

School of Chemical Engineering, Nanjing University of Science and Technology

Nanjing 210094, People's Republic of China.

\*Corresponding author. Tel: (86)-25-8431-7311. E-mail: [whtang@njust.edu.cn](mailto:whtang@njust.edu.cn), or  
[bzhou@mail.njust.edu.cn](mailto:bzhou@mail.njust.edu.cn) (additional)

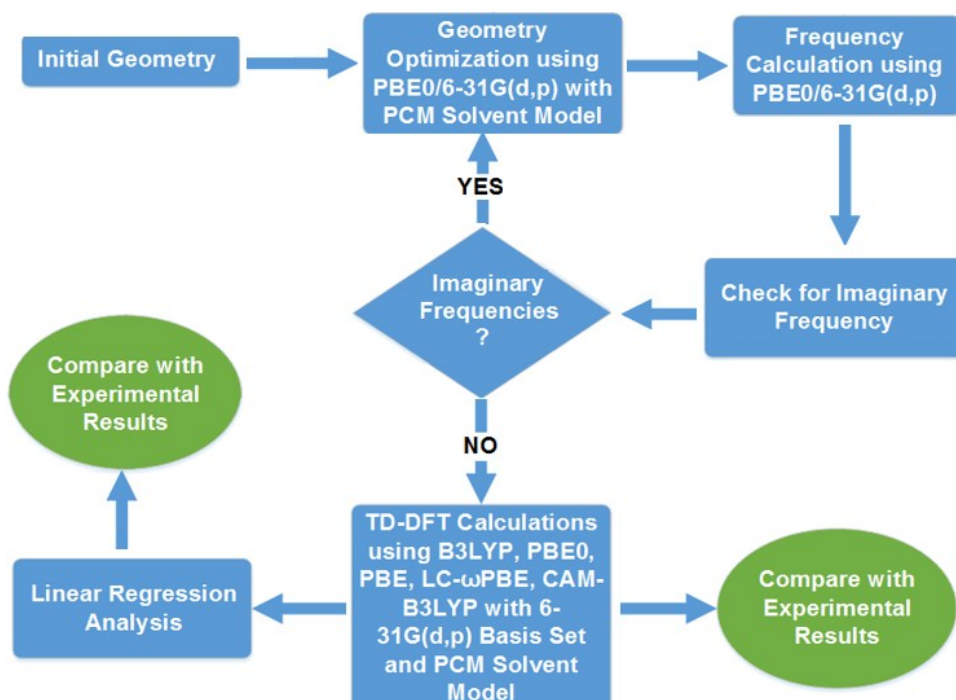

**Scheme S1.** Flow diagram of simulation process.

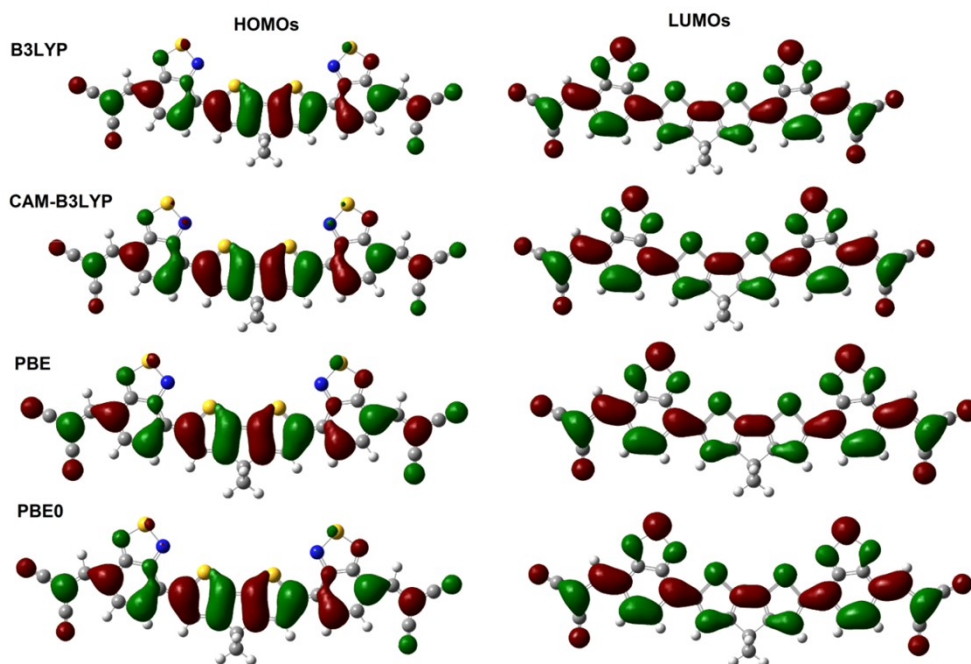

**Fig. S1.** HOMOs and LUMOs of CDTBM FREA using different functionals (contour threshold: 0.02 a.u.)

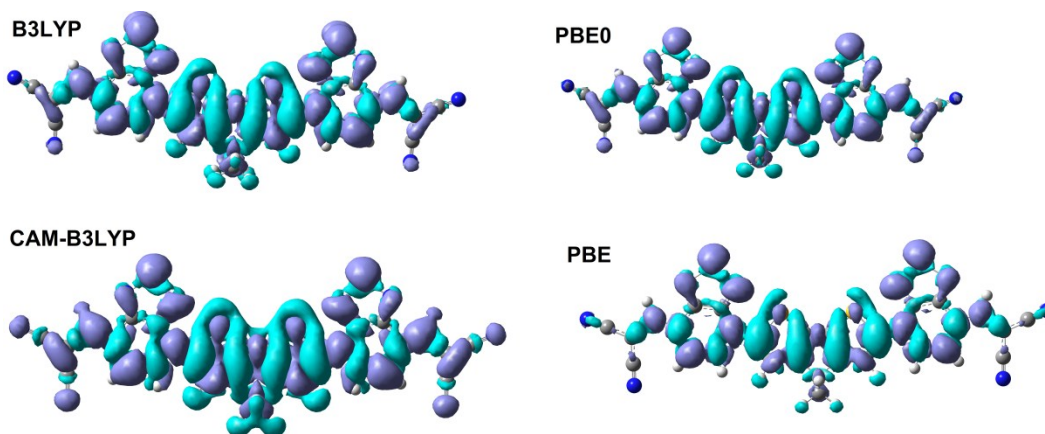

**Fig. S2.** Plot of the density difference between the ground and excited states computed for CDTBM (contour threshold: 0.0002 a.u.).

**Table S1.** Solvents used in the in simulation process

| SN. | FREAs      | Solvent         | SN. | FREAs      | Solvent         |
|-----|------------|-----------------|-----|------------|-----------------|
| 1   | DBS-2DPP   | Chlorobenzene   | 26  | IDTOT2F    | Chloroform      |
| 2   | F(DPP)2B2  | Chloroform      | 27  | ITOIC-F    | Chloroform      |
| 3   | F8IDT      | Chlorobenzene   | 28  | ITOIC-2F   | Chloroform      |
| 4   | FEHIDT     | Dichloromethane | 29  | IEICO      | Chloroform      |
| 5   | Cz-RH      | Chloroform      | 30  | ATT-2      | Chloroform      |
| 6   | Flu-RH     | Chloroform      | 31  | IEICO-4F   | Chloroform      |
| 7   | FBM        | Chloroform      | 32  | DTCCIC-C17 | Chlorobenzene   |
| 8   | CDTBM      | Chloroform      | 33  | m-ITIC     | Chloroform      |
| 9   | DICH2TF    | Dichloromethane | 34  | IT-DM      | Chloroform      |
| 10  | FRd2       | Chloroform      | 35  | IT-M       | Chloroform      |
| 11  | ITDI       | Chloroform      | 36  | ITCPTC     | Chloroform      |
| 12  | IDT-BC6    | Chloroform      | 37  | C8-ITIC    | Chlorobenzene   |
| 13  | IDT-2B     | Chlorobenzene   | 38  | Cl-ITIC    | Chloroform      |
| 14  | SiIDT-IC   | Chloroform      | 39  | Br-ITIC    | Chloroform      |
| 15  | IFBR-d     | Chlorobenzene   | 40  | NFBBDT     | Chloroform      |
| 16  | IDIDT-C8   | Chloroform      | 41  | ITIC2      | Chloroform      |
| 17  | IC-1IDT-IC | Dichloromethane | 42  | BT-IC      | Dichloromethane |
| 18  | IDT-OB     | Chlorobenzene   | 43  | ITVffIC    | Chloroform      |
| 19  | IDT-2O     | Chlorobenzene   | 44  | INIC       | Chloroform      |
| 20  | CO5IC      | Chlorobenzene   | 45  | INIC2      | Chloroform      |
| 21  | IDT-BOC6   | Chloroform      | 46  | INIC1      | Chloroform      |
| 22  | ATT-1      | Chloroform      | 47  | INIC3      | Chloroform      |
| 23  | DC-IDT2T   | Chloroform      | 48  | IPIC       | Chloroform      |
| 24  | BZIC       | Chloroform      | 49  | IPIC-4F    | Chloroform      |
| 25  | ITOIC      | Chloroform      | 50  | IPIC-4Cl   | Chloroform      |

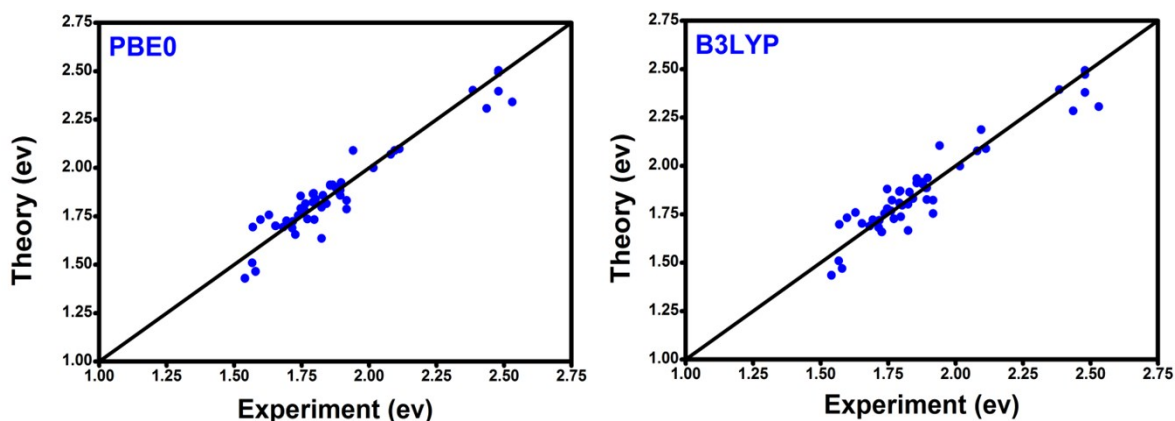

**Fig. S3.** Comparison between experimental  $\lambda_{\max}$  and the corrected theoretical vertical absorption wavelength values ( $\lambda_{\text{ver-abs}}$ ) using PBE0 and B3LYP. The solid line shows the theory-experiment perfect match.

**Table S2.** Charge transfer calculated with different functionals

| FREAs     | B3LYP | PBE0  | CAM-B3LYP | PBE   |
|-----------|-------|-------|-----------|-------|
| BT-IC     | 0.602 | 0.613 | 0.638     | 0.545 |
| C8-ITIC   | 0.554 | 0.568 | 0.622     | 0.439 |
| F8IDT     | 0.547 | 0.553 | 0.558     | 0.447 |
| IC-IDT-IC | 0.525 | 0.542 | 0.618     | 0.413 |
| CO5IC     | 0.557 | 0.571 | 0.633     | 0.455 |
| IDT-2B    | 0.542 | 0.555 | 0.615     | 0.45  |
| IDT-2O    | 0.507 | 0.522 | 0.59      | 0.393 |
| IDT-OB    | 0.536 | 0.549 | 0.609     | 0.467 |
| NFBDT     | 0.553 | 0.566 | 0.61      | 0.472 |
| ITOIC-2F  | 0.637 | 0.648 | 0.664     | 0.497 |
| INIC2     | 0.647 | 0.656 | 0.665     | 0.519 |
| IEICO-4F  | 0.6   | 0.626 | 0.715     | 0.411 |
| CDTBM     | 0.437 | 0.465 | 0.589     | 0.298 |
| CI-ITIC   | 0.588 | 0.6   | 0.645     | 0.482 |
| DC-IDT2T  | 0.647 | 0.659 | 0.67      | 0.509 |
| IPIC      | 0.598 | 0.609 | 0.645     | 0.477 |
| IPIC-4F   | 0.6   | 0.611 | 0.648     | 0.483 |
| IT-DM     | 0.593 | 0.605 | 0.646     | 0.482 |
| ITVFFIC   | 0.605 | 0.622 | 0.671     | 0.451 |
| Flu-RH    | 0.521 | 0.527 | 0.547     | 0.397 |

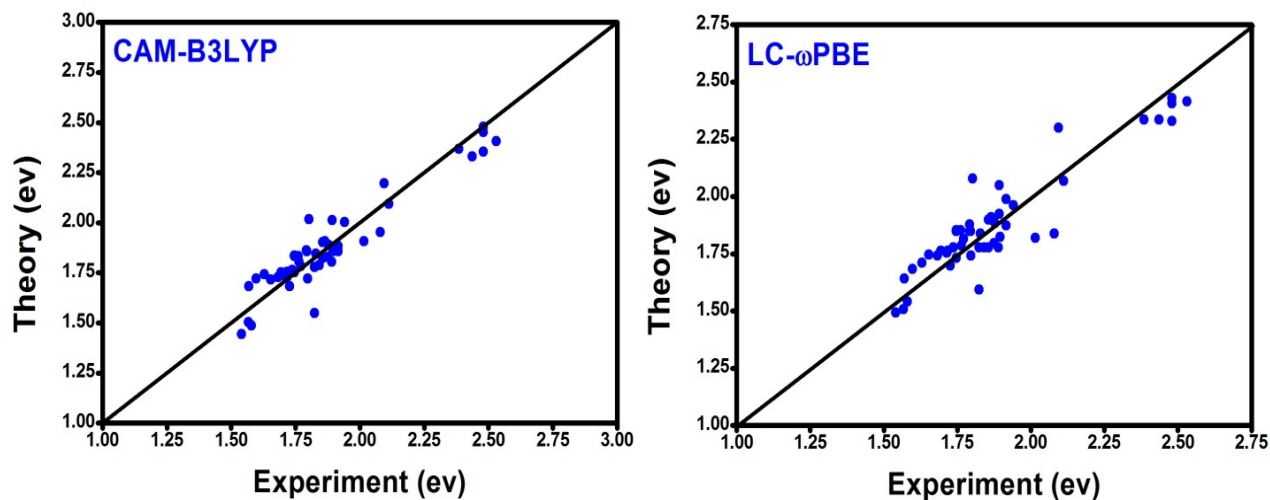

**Fig. S4.** Comparison between the experimental  $\lambda_{\max}$  and corrected data for computed vertical absorption wavelength values ( $\lambda_{\text{ver-abs}}$ ) using LC- $\omega$ PBE and CAM-B3LYP. The solid line shows the theory-experiment perfect match.

**Table S3.** Theoretical vertical excitation energy ( $\lambda_{\text{ver-abs}}$ ) comparison with experimental maximum wavelength ( $\lambda_{\max}$ ) using B3LYP, PBE0, CAM-B3LYP and PBE for a subset of 20 FREAs

| FREAs      | Theoretical Vertical Excitation Energy (eV) |       |           |        | Exp. Transition Energy (eV) | Deviation (Exp.-Theoretical) (eV) |        |           |        |
|------------|---------------------------------------------|-------|-----------|--------|-----------------------------|-----------------------------------|--------|-----------|--------|
|            | B3LYP                                       | PBE0  | CAM-B3LYP | PBE    |                             | B3LYP                             | PBE0   | CAM-B3LYP | PBE    |
| BT-IC      | 1.6                                         | 1.687 | 2.049     | 1.224  | 1.727                       | 0.127                             | 0.04   | -0.322    | 0.503  |
| C8-ITIC    | 1.717                                       | 1.805 | 2.138     | 1.39   | 1.824                       | 0.107                             | 0.019  | -0.314    | 0.434  |
| F8IDT      | 2.202                                       | 2.309 | 2.678     | 1.781  | 2.385                       | 0.183                             | 0.076  | -0.293    | 0.604  |
| IC-1IDT-IC | 1.787                                       | 1.865 | 2.16      | 1.494  | 1.89                        | 0.103                             | 0.025  | -0.27     | 0.396  |
| CO5IC      | 1.742                                       | 1.821 | 2.145     | 1.405  | 1.842                       | 0.1                               | 0.021  | -0.303    | 0.437  |
| IDT-2B     | 1.829                                       | 1.91  | 2.21      | 1.519  | 1.896                       | 0.067                             | -0.014 | -0.314    | 0.377  |
| IDT-2O     | 1.826                                       | 1.902 | 2.179     | 1.542  | 1.856                       | 0.03                              | -0.046 | -0.323    | 0.314  |
| IDT-OB     | 1.81                                        | 1.89  | 2.183     | 1.501  | 1.876                       | 0.066                             | -0.014 | -0.307    | 0.375  |
| NFBDT      | 1.734                                       | 1.821 | 2.16      | 1.379  | 1.764                       | 0.03                              | -0.057 | -0.396    | 0.385  |
| ITOIC-2F   | 1.625                                       | 1.719 | 2.091     | 1.264  | 1.682                       | 0.057                             | -0.037 | -0.409    | 0.418  |
| INIC2      | 1.689                                       | 1.792 | 2.187     | 1.301  | 1.761                       | 0.072                             | -0.031 | -0.426    | 0.46   |
| IEICO-4F   | 1.417                                       | 1.499 | 1.828     | 1.1242 | 1.54                        | 0.123                             | 0.041  | -0.288    | 0.4158 |
| CDTBM      | 1.606                                       | 1.671 | 1.925     | 1.43   | 1.823                       | 0.217                             | 0.152  | -0.102    | 0.393  |
| CI-ITIC    | 1.773                                       | 1.864 | 2.21      | 1.425  | 1.795                       | 0.022                             | -0.069 | -0.415    | 0.37   |
| DC-IDT2T   | 1.655                                       | 1.754 | 2.142     | 1.282  | 1.771                       | 0.116                             | 0.017  | -0.371    | 0.489  |
| IPIC       | 1.682                                       | 1.771 | 2.105     | 1.316  | 1.629                       | -0.053                            | -0.142 | -0.476    | 0.313  |
| IPIC-4F    | 1.659                                       | 1.751 | 2.084     | 1.299  | 1.597                       | -0.062                            | -0.154 | -0.487    | 0.298  |
| IT-DM      | 1.81                                        | 1.901 | 2.254     | 1.457  | 1.864                       | 0.054                             | -0.037 | -0.39     | 0.407  |
| ITVffIC    | 1.635                                       | 1.724 | 2.0805    | 1.301  | 1.653                       | 0.018                             | -0.071 | -0.4275   | 0.352  |

## Cartesian Coordinates

Below are the Cartesian coordinates of all FREAs chemical structures optimized in solution (See Table S1) using DFT-PBE0/6-31G(d,p) and PCM solvent model. All data is in Å.

### FBM

|     |              |             |             |
|-----|--------------|-------------|-------------|
| 0 1 |              |             |             |
| C   | 1.17269300   | 0.17346200  | -0.00400900 |
| C   | 0.72905100   | -1.16094400 | -0.00646400 |
| C   | -0.72904600  | -1.16094300 | 0.00646100  |
| C   | -1.17268700  | 0.17346300  | 0.00400500  |
| C   | 0.00000300   | 1.14064000  | -0.00000300 |
| C   | -1.64624700  | -2.21077900 | 0.02822400  |
| C   | -3.00327600  | -1.92018300 | 0.04921700  |
| C   | -3.46241200  | -0.58997300 | 0.03522500  |
| C   | -2.52487700  | 0.46000400  | 0.01383300  |
| C   | 2.52488300   | 0.46000300  | -0.01383700 |
| C   | 3.46241800   | -0.58997500 | -0.03522800 |
| C   | 3.00328100   | -1.92018500 | -0.04921900 |
| C   | 1.64625200   | -2.21077900 | -0.02822700 |
| C   | 0.00406700   | 2.01934600  | 1.25951100  |
| C   | -0.00406100  | 2.01934400  | -1.25951800 |
| C   | -4.89804900  | -0.28152600 | 0.00876200  |
| C   | 4.89805400   | -0.28152900 | -0.00876400 |
| C   | -5.39213200  | 0.80680900  | -0.69308700 |
| C   | -6.75793000  | 1.14497200  | -0.75168600 |
| C   | -7.74091100  | 0.40948200  | -0.10389600 |
| C   | -7.27743900  | -0.72354600 | 0.64771500  |
| C   | -5.87759300  | -1.06751200 | 0.70254600  |
| C   | 5.87759900   | -1.06751700 | -0.70254500 |
| C   | 7.27744500   | -0.72355000 | -0.64771500 |
| C   | 7.74091600   | 0.40948100  | 0.10389200  |
| C   | 6.75793400   | 1.14497100  | 0.75168200  |
| C   | 5.39213700   | 0.80680800  | 0.69308300  |
| N   | -8.05213500  | -1.54133300 | 1.35841600  |
| S   | -7.06611500  | -2.64275500 | 2.03638300  |
| N   | -5.63480600  | -2.13647200 | 1.46645000  |
| N   | 5.63481200   | -2.13647600 | -1.46645000 |
| S   | 7.06612300   | -2.64277000 | -2.03636800 |
| N   | 8.05214100   | -1.54133600 | -1.35841700 |
| C   | -9.15459200  | 0.66573500  | -0.11167000 |
| C   | 9.15459500   | 0.66573900  | 0.11166800  |
| C   | -9.87888600  | 1.64608100  | -0.72977300 |
| C   | 9.87887800   | 1.64609100  | 0.72977400  |
| C   | -11.29859100 | 1.67245800  | -0.57204000 |
| N   | -12.45362400 | 1.69722800  | -0.44593900 |
| C   | -9.33675500  | 2.68161900  | -1.54697000 |
| N   | -8.91323500  | 3.53300900  | -2.21593600 |
| C   | 11.29858300  | 1.67248300  | 0.57204800  |
| N   | 12.45361700  | 1.69726400  | 0.44595200  |
| C   | 9.33673000   | 2.68162300  | 1.54696800  |
| N   | 8.91317600   | 3.53300000  | 2.21592900  |
| H   | -1.31377800  | -3.24469600 | 0.02802100  |
| H   | -3.72335800  | -2.72951700 | 0.06408200  |
| H   | -2.86977500  | 1.49038700  | 0.03840800  |
| H   | 2.86978100   | 1.49038600  | -0.03841200 |
| H   | 3.72336200   | -2.72951900 | -0.06408400 |
| H   | 1.31378200   | -3.24469700 | -0.02802200 |
| H   | -0.88122700  | 2.66266800  | 1.28090400  |
| H   | 0.00854500   | 1.40890900  | 2.16673700  |
| H   | 0.88797400   | 2.66489000  | 1.27289900  |
| H   | 0.88123400   | 2.66266600  | -1.28091100 |
| H   | -0.00853900  | 1.40890500  | -2.16674300 |
| H   | -0.88796800  | 2.66488800  | -1.27290700 |
| H   | -4.69915000  | 1.42039100  | -1.25923200 |
| H   | -7.03122600  | 2.01093600  | -1.34280700 |
| H   | 7.03123200   | 2.01093800  | 1.34280000  |
| H   | 4.69915500   | 1.42039200  | 1.25922700  |
| H   | -9.73821400  | -0.04187900 | 0.47229600  |
| H   | 9.73822300   | -0.04187200 | -0.47229700 |

### FEHDT

0 1

|   |              |             |             |
|---|--------------|-------------|-------------|
| C | 0.72118300   | 0.16286200  | 0.07644100  |
| C | 1.17444800   | 1.49452500  | 0.11164700  |
| C | 0.00000300   | 2.48368300  | 0.00015700  |
| C | -1.17445000  | 1.49454700  | -0.11144500 |
| C | -0.72119500  | 0.16287700  | -0.07639300 |
| C | -2.53283300  | 1.73066800  | -0.27275400 |
| C | -3.43779800  | 0.65917200  | -0.39916400 |
| C | -2.95484000  | -0.65975000 | -0.35297500 |
| C | -1.60271600  | -0.91128400 | -0.18981500 |
| C | 1.60269400   | -0.91131900 | 0.18974300  |
| C | 2.95482100   | -0.65981500 | 0.35293800  |
| C | 3.43778700   | 0.65909800  | 0.39928200  |
| C | 2.53283200   | 1.73061700  | 0.27299000  |
| C | -0.07599700  | 3.29635000  | 1.35460300  |
| C | 0.07601500   | 3.29651300  | -1.35418900 |
| C | -4.86079800  | 0.93364500  | -0.57516100 |
| C | 4.86078700   | 0.93354200  | 0.57532300  |
| C | -5.44497800  | 2.09457800  | -1.05954600 |
| C | -6.83997800  | 2.02059700  | -1.10467100 |
| C | -7.35685800  | 0.80741300  | -0.65809300 |
| S | -6.05742300  | -0.24853800 | -0.16497000 |
| S | 6.05741400   | -0.24856500 | 0.16492400  |
| C | 7.35684700   | 0.80730400  | 0.65823100  |
| C | 6.83996300   | 2.02041000  | 1.10501900  |
| C | 5.44496300   | 2.09439300  | 1.05990900  |
| C | -8.75083100  | 0.53753400  | -0.63299700 |
| C | 8.75082100   | 0.53743600  | 0.63308700  |
| C | 9.48732600   | -0.54662000 | 0.26165400  |
| C | -9.48733200  | -0.54658700 | -0.26174500 |
| C | -10.96560200 | -0.52310000 | -0.36119600 |
| C | -11.44087000 | -1.85264500 | 0.10924600  |
| C | -10.33885900 | -2.63330200 | 0.47150900  |
| C | -9.08175200  | -1.86071700 | 0.25971000  |
| C | 10.96559500  | -0.52314400 | 0.36111400  |
| C | 11.44086700  | -1.85262500 | -0.10950600 |
| C | 10.33886000  | -2.63322500 | -0.47190600 |
| C | 9.08175200   | -1.86066300 | -0.26002400 |
| C | -12.73495700 | -2.34329600 | 0.21118400  |
| C | -12.90101500 | -3.64346000 | 0.68727500  |
| C | -11.79765900 | -4.42513600 | 1.05006500  |
| C | -10.49915700 | -3.92741800 | 0.94648300  |
| C | 12.73495300  | -2.34326900 | -0.21148200 |
| C | 12.90101500  | -3.64336600 | -0.68775300 |
| C | 11.79766400  | -4.42498500 | -1.05068200 |
| C | 10.49916100  | -3.92727300 | -0.94706000 |
| O | 7.95151900   | -2.26979200 | -0.48596400 |
| O | 11.66180500  | 0.39976400  | 0.75219300  |
| O | -7.95151800  | -2.26988100 | 0.48558200  |
| O | -11.66181700 | 0.39987400  | -0.75210900 |
| C | -1.45298100  | 3.83726900  | 1.75421000  |
| C | 0.94385900   | 4.43033300  | 1.48927800  |
| C | -0.94378400  | 4.43056600  | -1.48870600 |
| C | 1.45301800   | 3.83740900  | -1.75375900 |
| H | -2.92911700  | 2.73766900  | -0.27021500 |
| H | -3.64341900  | -1.49178500 | -0.46901900 |
| H | -1.23858700  | -1.93409200 | -0.16528200 |
| H | 1.23855600   | -1.93412000 | 0.16509300  |
| H | 3.64339400   | -1.49186700 | 0.46889100  |
| H | 2.92912700   | 2.73761500  | 0.27057000  |
| H | 0.18060000   | 2.55111200  | 2.12040900  |
| H | -0.18063400  | 2.55138100  | -2.12008100 |
| H | -4.87664100  | 2.95260600  | -1.39795800 |
| H | -7.48163900  | 2.81795000  | -1.46437500 |
| H | 7.48162200   | 2.81770000  | 1.46486200  |
| H | 4.87661900   | 2.95235600  | 1.39847200  |
| H | -9.35677700  | 1.37452900  | -0.98691000 |
| H | 9.35676300   | 1.37437400  | 0.98714000  |
| H | -13.58444800 | -1.72973000 | -0.07229200 |
| H | -13.89975900 | -4.05958600 | 0.77947400  |
| H | -11.95974200 | -5.43401100 | 1.41755700  |
| H | -9.63729600  | -4.52561800 | 1.22550600  |
| H | 13.58444100  | -1.72974800 | 0.07210200  |
| H | 13.89975900  | -4.05948500 | -0.77998800 |
| H | 11.95974900  | -5.43380800 | -1.41831300 |
| H | 9.63730400   | -4.52542900 | -1.22618800 |
| H | -1.36131900  | 4.34159900  | 2.72194300  |
| H | -2.19215600  | 3.04341300  | 1.87365800  |
| H | -1.84401400  | 4.57194400  | 1.04527700  |
| H | 0.90401400   | 4.82465100  | 2.50989200  |
| H | 1.97210500   | 4.11214300  | 1.31229700  |

|   |             |            |             |
|---|-------------|------------|-------------|
| H | 0.72419500  | 5.26258300 | 0.81439800  |
| H | -0.90393100 | 4.82501000 | -2.50927200 |
| H | -1.97204500 | 4.11241000 | -1.31175200 |
| H | -0.72406700 | 5.26271800 | -0.81372400 |
| H | 1.36136400  | 4.34185000 | -2.72143600 |
| H | 2.19215300  | 3.04353100 | -1.87330800 |
| H | 1.84409900  | 4.57198900 | -1.04475300 |

## Cz-RH

|     |              |             |             |
|-----|--------------|-------------|-------------|
| 0 1 |              |             |             |
| C   | -1.10965700  | -2.20947800 | 0.12249400  |
| C   | -0.70982400  | -3.56983600 | 0.08260400  |
| C   | 0.71252000   | -3.57044500 | -0.11732300 |
| C   | 1.10952100   | -2.21043300 | -0.18593600 |
| N   | -0.00325700  | -1.40518500 | -0.05647400 |
| C   | 1.67983900   | -4.57176000 | -0.24160800 |
| C   | 3.00344100   | -4.21529300 | -0.42532000 |
| C   | 3.39690600   | -2.85774900 | -0.49287600 |
| C   | 2.43867900   | -1.84428600 | -0.36971700 |
| C   | -2.43521800  | -1.84226000 | 0.32923100  |
| C   | -3.39062900  | -2.85497100 | 0.47797300  |
| C   | -2.99674300  | -4.21287000 | 0.42311500  |
| C   | -1.67443100  | -4.57035100 | 0.23198000  |
| C   | -0.00045600  | 0.03695400  | -0.04118100 |
| C   | 4.80662600   | -2.53026000 | -0.68733500 |
| C   | -4.79647000  | -2.52529000 | 0.69522300  |
| S   | 5.45359400   | -1.01113700 | -0.16562700 |
| C   | 7.04724900   | -1.41694300 | -0.75113500 |
| C   | 7.03393200   | -2.69269000 | -1.30812700 |
| C   | 5.78321500   | -3.31805200 | -1.27310900 |
| C   | -5.76147600  | -3.30386300 | 1.31165900  |
| C   | -7.01103200  | -2.67717100 | 1.36217600  |
| C   | -7.03497700  | -1.40988100 | 0.78645400  |
| S   | -5.45335900  | -1.01422800 | 0.16278700  |
| C   | 8.24364100   | -0.64306300 | -0.70779500 |
| C   | -8.23134400  | -0.63525200 | 0.75676300  |
| C   | 8.54283700   | 0.60108200  | -0.24155000 |
| C   | -8.53926000  | 0.60182300  | 0.27759000  |
| C   | 7.65131300   | 1.56776800  | 0.39103800  |
| N   | 8.35404900   | 2.73321100  | 0.72634900  |
| C   | 9.67957100   | 2.77433200  | 0.41077000  |
| S   | 10.16662800  | 1.27685100  | -0.34974000 |
| S   | -10.15932400 | 1.28199200  | 0.41124200  |
| C   | -9.68811500  | 2.76521500  | -0.38626000 |
| N   | -8.37020600  | 2.71656100  | -0.73128700 |
| C   | -7.66114000  | 1.55639900  | -0.39116200 |
| O   | -6.47543900  | 1.42023500  | -0.64630900 |
| O   | 6.46011700   | 1.43695200  | 0.62223500  |
| C   | -7.67607600  | 3.81641000  | -1.39631500 |
| C   | 7.64619100   | 3.84605800  | 1.35423500  |
| C   | 7.06954300   | 4.80642400  | 0.32726300  |
| C   | -7.07341400  | 4.79467100  | -0.40169700 |
| S   | -10.74307200 | 4.00752700  | -0.65707600 |
| S   | 10.73011400  | 4.01976500  | 0.68440300  |
| H   | 1.40032500   | -5.61956500 | -0.18306200 |
| H   | 3.76070300   | -4.98936000 | -0.48972200 |
| H   | 2.72927500   | -0.80046200 | -0.43622000 |
| H   | -2.72331900  | -0.79861500 | 0.40715400  |
| H   | -3.75205100  | -4.98667100 | 0.50980300  |
| H   | -1.39318300  | -5.61856300 | 0.19181300  |
| H   | -0.94891300  | 0.40877400  | -0.43312200 |
| H   | 0.14908800   | 0.43420200  | 0.96860800  |
| H   | 0.79456500   | 0.40879400  | -0.69018900 |
| H   | 7.92435700   | -3.13929400 | -1.73789800 |
| H   | 5.58695600   | -4.29896100 | -1.68917200 |
| H   | -5.55714600  | -4.27842400 | 1.73865600  |
| H   | -7.89274500  | -3.11640400 | 1.81679000  |
| H   | 9.08106700   | -1.18497900 | -1.14657100 |
| H   | -9.05966800  | -1.16913400 | 1.22191800  |
| H   | -6.90040900  | 3.35478200  | -2.01085600 |
| H   | -8.40431900  | 4.30660800  | -2.04538300 |
| H   | 6.85503700   | 3.39705500  | 1.95827800  |
| H   | 8.35943700   | 4.34731300  | 2.01144500  |
| H   | 6.54415300   | 5.61745000  | 0.83904700  |
| H   | 7.86161400   | 5.24429100  | -0.28559500 |
| H   | 6.35675800   | 4.29499400  | -0.32492600 |
| H   | -6.55958800  | 5.59505200  | -0.94122300 |
| H   | -7.84972700  | 5.24532500  | 0.22199600  |
| H   | -6.34561600  | 4.29424500  | 0.24237900  |



# Flu-RH

|     |              |             |             |
|-----|--------------|-------------|-------------|
| 0 1 |              |             |             |
| C   | -1.17353200  | -2.01317500 | -0.01464600 |
| C   | -0.72823000  | -0.67892900 | -0.00992100 |
| C   | 0.72822400   | -0.67892700 | 0.00952100  |
| C   | 1.17352300   | -2.01317400 | 0.01461800  |
| C   | -0.00000600  | -2.97990300 | 0.00012700  |
| C   | 1.65003500   | 0.36735000  | 0.02307800  |
| C   | 3.00448600   | 0.06957100  | 0.03968700  |
| C   | 3.46843800   | -1.26007600 | 0.04296400  |
| C   | 2.52349300   | -2.30523100 | 0.03062000  |
| C   | -2.52350300  | -2.30523400 | -0.03056200 |
| C   | -3.46844500  | -1.26008000 | -0.04320700 |
| C   | -3.00449000  | 0.06956800  | -0.04030200 |
| C   | -1.65003900  | 0.36734700  | -0.02376800 |
| C   | -0.01557300  | -3.85819600 | 1.25962300  |
| C   | 0.01555800   | -3.85856100 | -1.25911600 |
| C   | 4.89706600   | -1.56039800 | 0.05890100  |
| C   | -4.89707300  | -1.56040200 | -0.05906700 |
| S   | 6.08134500   | -0.29322000 | 0.06192400  |
| C   | 7.40064400   | -1.43396000 | 0.08268800  |
| C   | 6.90045600   | -2.73273700 | 0.08571200  |
| C   | 5.50477200   | -2.80630900 | 0.07242700  |
| C   | -5.50477700  | -2.80631300 | -0.07261100 |
| C   | -6.90046300  | -2.73274400 | -0.08580600 |
| C   | -7.40065200  | -1.43396800 | -0.08269800 |
| S   | -6.08135400  | -0.29322700 | -0.06195300 |
| C   | 8.80364500   | -1.18268900 | 0.09723200  |
| C   | -8.80365400  | -1.18269700 | -0.09715300 |
| C   | 9.55707300   | -0.04809000 | 0.10163600  |
| C   | -9.55708200  | -0.04809700 | -0.10148000 |
| C   | 9.10322500   | 1.33915200  | 0.08903900  |
| N   | 10.19995300  | 2.21168600  | 0.11156700  |
| C   | 11.44220600  | 1.65104600  | 0.12519500  |
| S   | 11.31837500  | -0.09341700 | 0.12488700  |
| S   | -11.31838600 | -0.09342000 | -0.12463600 |
| C   | -11.44221300 | 1.65104400  | -0.12486600 |
| N   | -10.19995800 | 2.21168000  | -0.11139400 |
| C   | -9.10323000  | 1.33914500  | -0.08889300 |
| O   | 7.95173400   | 1.74204200  | 0.06484400  |
| S   | 12.89219700  | 2.44250300  | 0.14634600  |
| C   | 9.97330200   | 3.65461100  | 0.08739500  |
| C   | 9.91799700   | 4.20027900  | -1.32974800 |
| S   | -12.89219900 | 2.44250400  | -0.14625700 |
| O   | -7.95173600  | 1.74203200  | -0.06480600 |
| C   | -9.97330200  | 3.65460800  | -0.08737600 |
| C   | -9.91786700  | 4.20040400  | 1.32971300  |
| H   | 1.32356400   | 1.40313900  | 0.02150800  |
| H   | 3.71785700   | 0.88891700  | 0.05081400  |
| H   | 2.85454600   | -3.33942900 | 0.03300700  |
| H   | -2.85456000  | -3.33943100 | -0.03262600 |
| H   | -3.71786000  | 0.88891100  | -0.05168500 |
| H   | -1.32356400  | 1.40313600  | -0.02249000 |
| H   | -0.90053300  | -4.50249000 | 1.26687300  |
| H   | 0.86897500   | -4.50240500 | 1.28878700  |
| H   | -0.02683500  | -3.24713300 | 2.16636400  |
| H   | 0.90052200   | -4.50285200 | -1.26618900 |
| H   | -0.86898500  | -4.50278600 | -1.28808900 |
| H   | 0.02681000   | -3.24775800 | -2.16603300 |
| H   | 7.55322900   | -3.59924300 | 0.09806800  |
| H   | 4.96073200   | -3.74267700 | 0.07346400  |
| H   | -4.96073400  | -3.74268000 | -0.07374900 |
| H   | -7.55323400  | -3.59925100 | -0.09817400 |
| H   | 9.37091200   | -2.11284500 | 0.10880600  |
| H   | -9.37092300  | -2.11285200 | -0.10872200 |
| H   | 9.02739400   | 3.81878200  | 0.60769300  |
| H   | 10.78217900  | 4.11376900  | 0.65909500  |
| H   | 9.74043700   | 5.27881700  | -1.29925000 |
| H   | 10.86083000  | 4.02300700  | -1.85358500 |
| H   | 9.10483200   | 3.73574400  | -1.89356600 |
| H   | -9.02744000  | 3.81872800  | -0.60777300 |
| H   | -10.78222800 | 4.11371800  | -0.65904600 |
| H   | -9.74031100  | 5.27894000  | 1.29909900  |
| H   | -10.86065000 | 4.02317900  | 1.85365300  |
| H   | -9.10464800  | 3.73592200  | 1.89349800  |

FR-d2

|   |   |              |             |             |
|---|---|--------------|-------------|-------------|
| 0 | 1 |              |             |             |
| C |   | -0.72674600  | -2.52718200 | -0.30557000 |
| C |   | -1.39870900  | -1.30622400 | -0.48530600 |
| C |   | -0.42614600  | -0.19846700 | -0.85764300 |
| C |   | 0.89125300   | -0.95735800 | -0.86897000 |
| C |   | 0.69644500   | -2.31073400 | -0.54329800 |
| C |   | 2.16103100   | -0.47757500 | -1.13462600 |
| C |   | 3.26638800   | -1.34720100 | -1.08195000 |
| C |   | 3.05505600   | -2.69816400 | -0.75246200 |
| C |   | 1.78120900   | -3.18372400 | -0.48651800 |
| C |   | -1.43535800  | -3.67375100 | 0.04993000  |
| C |   | -2.81117300  | -3.58692100 | 0.21366400  |
| C |   | -3.49992600  | -2.37420300 | 0.02671500  |
| C |   | -2.77017000  | -1.22349300 | -0.32187100 |
| C |   | -0.74676800  | 0.38723700  | -2.24050100 |
| C |   | -0.42209900  | 0.91530000  | 0.19973300  |
| C |   | 4.61006000   | -0.83645800 | -1.40271900 |
| C |   | -7.88049500  | -2.35434900 | 0.40620300  |
| C |   | 4.80234200   | 0.13774700  | -2.36310400 |
| C |   | 6.06791100   | 0.67607800  | -2.68447100 |
| C |   | 7.23647900   | 0.26462000  | -2.07391700 |
| C |   | 7.10285300   | -0.76029100 | -1.08239000 |
| C |   | 5.80001600   | -1.29968300 | -0.74882800 |
| C |   | -7.11707800  | -1.21470200 | 0.81881100  |
| C |   | -5.67361800  | -1.20979000 | 0.69425600  |
| C |   | -4.96515500  | -2.34171300 | 0.16932100  |
| C |   | -5.75160500  | -3.41915500 | -0.19059300 |
| C |   | -7.15920900  | -3.42783600 | -0.07802200 |
| N |   | 8.09905300   | -1.32417900 | -0.39880000 |
| S |   | 7.42201900   | -2.41615100 | 0.59317800  |
| N |   | 5.85607200   | -2.23836400 | 0.20006400  |
| N |   | -7.60389200  | -0.10403600 | 1.37382800  |
| S |   | -6.33150200  | 0.85391500  | 1.68781500  |
| N |   | -5.11799700  | -0.08528500 | 1.15467400  |
| C |   | -9.32337500  | -2.42027700 | 0.49539000  |
| C |   | 10.59014200  | 1.44092200  | -2.16896100 |
| C |   | 10.25324300  | 1.78710900  | -3.46649700 |
| C |   | 8.91428800   | 1.41022100  | -3.65171600 |
| C |   | 8.50724300   | 0.83878500  | -2.46215600 |
| O |   | 9.51908600   | 0.86058300  | -1.56848700 |
| O |   | -10.03281200 | -1.27472300 | 0.42532700  |
| C |   | -11.34834500 | -1.59375700 | 0.52550000  |
| C |   | -11.47516600 | -2.96491500 | 0.66994400  |
| C |   | -10.17639700 | -3.49672200 | 0.64012000  |
| C |   | 11.85061400  | 1.61307000  | -1.53876700 |
| C |   | 12.29420800  | 1.42895500  | -0.26536000 |
| C |   | -12.38883100 | -0.62817000 | 0.50945100  |
| C |   | -12.41183100 | 0.70792400  | 0.25098100  |
| S |   | -13.89413000 | 1.64265800  | 0.44381600  |
| C |   | -13.12196700 | 3.13113200  | -0.05342200 |
| N |   | -11.82038800 | 2.90211800  | -0.36971700 |
| C |   | -11.33826800 | 1.58266700  | -0.24494800 |
| S |   | 13.99903200  | 1.63371400  | 0.13563200  |
| C |   | 13.73727800  | 1.24866000  | 1.82156100  |
| N |   | 12.42085000  | 0.99753300  | 2.04682300  |
| C |   | 11.53768900  | 1.10448000  | 0.95318200  |
| O |   | 10.33877000  | 0.96820000  | 1.08319400  |
| O |   | -10.20378500 | 1.28362400  | -0.55554700 |
| S |   | -13.92928900 | 4.57294100  | -0.11165900 |
| S |   | 14.96793900  | 1.21038500  | 2.92488200  |
| C |   | -10.91027000 | 3.95212400  | -0.81782200 |
| C |   | 11.88186300  | 0.69034500  | 3.36872500  |
| C |   | 11.48963000  | 1.94510600  | 4.13112200  |
| C |   | -10.16954300 | 4.59476500  | 0.34313200  |
| H |   | 2.31623400   | 0.57576100  | -1.35458300 |
| H |   | 3.90305600   | -3.37131700 | -0.71102100 |
| H |   | 1.64215900   | -4.23271300 | -0.24053800 |
| H |   | -0.92678300  | -4.62025100 | 0.20980500  |
| H |   | -3.36453400  | -4.46901300 | 0.52151800  |
| H |   | -3.29001400  | -0.28219300 | -0.46428700 |
| H |   | -0.00204000  | 1.13941000  | -2.52042300 |
| H |   | -0.75374500  | -0.39248300 | -3.00736700 |
| H |   | -1.72836000  | 0.87184700  | -2.23312000 |
| H |   | -1.40105600  | 1.40295400  | 0.24579000  |
| H |   | -0.19052200  | 0.51628900  | 1.19115600  |
| H |   | 0.32392100   | 1.67725100  | -0.04818300 |
| H |   | 3.94256400   | 0.50732500  | -2.91286200 |
| H |   | 6.11349000   | 1.45847700  | -3.43583000 |

|   |              |             |             |
|---|--------------|-------------|-------------|
| H | -5.27594600  | -4.29360900 | -0.62310600 |
| H | -7.69359900  | -4.30635200 | -0.42633100 |
| H | 10.91386900  | 2.25125100  | -4.18552400 |
| H | 8.32200300   | 1.50575900  | -4.54989900 |
| H | -12.40590600 | -3.50238900 | 0.78683900  |
| H | -9.88654000  | -4.53187500 | 0.74607100  |
| H | 12.59666400  | 1.95548300  | -2.25378200 |
| H | -13.34538900 | -1.07950500 | 0.76661100  |
| H | -10.21409600 | 3.47231400  | -1.50882700 |
| H | -11.51001400 | 4.68467600  | -1.36130200 |
| H | 11.01413500  | 0.04979800  | 3.19847100  |
| H | 12.64848000  | 0.12455300  | 3.90192900  |
| H | 11.08760500  | 1.66853400  | 5.10974700  |
| H | 12.35566900  | 2.59342300  | 4.28728700  |
| H | 10.72032700  | 2.50208800  | 3.59007500  |
| H | -9.49579500  | 5.36875500  | -0.03485900 |
| H | -10.86904000 | 5.06070500  | 1.04215400  |
| H | -9.57183100  | 3.85309900  | 0.87978900  |

## F8IDT

|     |              |             |             |
|-----|--------------|-------------|-------------|
| 0 1 |              |             |             |
| C   | 0.72818000   | -0.54778700 | -0.00040600 |
| C   | 1.17353600   | -1.88205100 | -0.00020000 |
| C   | 0.00000000   | -2.84890000 | 0.00020300  |
| C   | -1.17353500  | -1.88205100 | 0.00018000  |
| C   | -0.72817900  | -0.54778700 | -0.00017600 |
| C   | -2.52387500  | -2.17339500 | 0.00044800  |
| C   | -3.46757600  | -1.12698700 | 0.00034700  |
| C   | -3.00334000  | 0.20269800  | -0.00000400 |
| C   | -1.64893000  | 0.49971700  | -0.00025700 |
| C   | 1.64893100   | 0.49971700  | -0.00076700 |
| C   | 3.00334100   | 0.20269800  | -0.00091000 |
| C   | 3.46757700   | -1.12698700 | -0.00070300 |
| C   | 2.52387600   | -2.17339600 | -0.00034600 |
| C   | -0.00020500  | -3.72765500 | -1.25913900 |
| C   | 0.00020600   | -3.72710000 | 1.25993200  |
| C   | -4.89669000  | -1.42466700 | 0.00059100  |
| C   | 4.89669000   | -1.42466700 | -0.00084300 |
| C   | -5.50536300  | -2.67227500 | 0.00103500  |
| C   | -6.90023000  | -2.59818500 | 0.00115100  |
| C   | -7.39788200  | -1.29809700 | 0.00078300  |
| S   | -6.07857000  | -0.15653200 | 0.00030100  |
| S   | 6.07857100   | -0.15653300 | -0.00040300 |
| C   | 7.39788200   | -1.29809700 | -0.00084800 |
| C   | 6.90023100   | -2.59818600 | -0.00129900 |
| C   | 5.50536400   | -2.67227600 | -0.00128700 |
| C   | -8.78912100  | -1.01442700 | 0.00080900  |
| C   | 8.78912100   | -1.01442700 | -0.00077600 |
| C   | 9.50805500   | 0.14297400  | -0.00031900 |
| C   | -9.50805600  | 0.14297400  | 0.00043000  |
| C   | -10.98955900 | 0.11042800  | 0.00057100  |
| C   | -11.44245200 | 1.52837800  | 0.00001500  |
| C   | -10.32443500 | 2.36794500  | -0.00043300 |
| C   | -9.07868100  | 1.54980400  | -0.00019100 |
| C   | 10.98955800  | 0.11042900  | -0.00038100 |
| C   | 11.44245100  | 1.52837900  | 0.00023400  |
| C   | 10.32443400  | 2.36794600  | 0.00063900  |
| C   | 9.07868000   | 1.54980400  | 0.00031300  |
| C   | -12.73029400 | 2.04570800  | -0.00010400 |
| C   | -12.87328700 | 3.43287500  | -0.00068800 |
| C   | -11.75363100 | 4.27336700  | -0.00113700 |
| C   | -10.46153000 | 3.74882300  | -0.00101300 |
| C   | 12.73029300  | 2.04570900  | 0.00043400  |
| C   | 12.87328600  | 3.43287600  | 0.00105400  |
| C   | 11.75363000  | 4.27336800  | 0.00145900  |
| C   | 10.46152800  | 3.74882400  | 0.00125500  |
| O   | 7.93930100   | 1.99436100  | 0.00055700  |
| O   | 11.70346800  | -0.87939300 | -0.00083700 |
| O   | -7.93930200  | 1.99436100  | -0.00047800 |
| O   | -11.70346900 | -0.87939400 | 0.00105100  |
| H   | -2.85571300  | -3.20725600 | 0.00071900  |
| H   | -3.71649800  | 1.02224300  | -0.00007500 |
| H   | -1.32160700  | 1.53517000  | -0.00051600 |
| H   | 1.32160800   | 1.53516900  | -0.00094900 |
| H   | 3.71649900   | 1.02224200  | -0.00122500 |
| H   | 2.85571400   | -3.20725700 | -0.00013800 |
| H   | 0.88458000   | -4.37189100 | -1.27695800 |
| H   | -0.88499600  | -4.37189200 | -1.27666900 |

|   |              |             |             |
|---|--------------|-------------|-------------|
| H | -0.00035400  | -3.11704400 | -2.16626700 |
| H | -0.88458000  | -4.37132700 | 1.27803100  |
| H | 0.88499700   | -4.37132800 | 1.27774200  |
| H | 0.00035500   | -3.11609200 | 2.16679200  |
| H | -4.96064300  | -3.60814300 | 0.00127300  |
| H | -7.55613300  | -3.46222600 | 0.00148500  |
| H | 7.55613400   | -3.46222700 | -0.00163400 |
| H | 4.96064400   | -3.60814400 | -0.00164000 |
| H | -9.41007500  | -1.91300100 | 0.00120100  |
| H | 9.41007600   | -1.91300000 | -0.00115700 |
| H | -13.59260700 | 1.38625500  | 0.00024400  |
| H | -13.86657900 | 3.87159400  | -0.00079900 |
| H | -11.89762600 | 5.34965600  | -0.00158700 |
| H | -9.58710800  | 4.39215000  | -0.00135800 |
| H | 13.59260600  | 1.38625600  | 0.00011800  |
| H | 13.86657700  | 3.87159600  | 0.00122700  |
| H | 11.89762400  | 5.34965700  | 0.00193900  |
| H | 9.58710700   | 4.39215000  | 0.00156700  |

## DICTF

0 1

|   |              |             |             |
|---|--------------|-------------|-------------|
| C | 1.41350100   | -1.78451200 | -0.34210500 |
| C | 1.02721400   | -0.43672700 | -0.22468000 |
| C | -0.41945600  | -0.38511700 | -0.06028100 |
| C | -0.91505100  | -1.70190000 | -0.06932800 |
| C | 0.20990600   | -2.70773100 | -0.24852400 |
| C | -1.28814000  | 0.69632300  | 0.08679400  |
| C | -2.64606600  | 0.45090100  | 0.22528300  |
| C | -3.15766000  | -0.86104000 | 0.21628900  |
| C | -2.26881700  | -1.94321400 | 0.06463400  |
| C | 2.74323300   | -2.12216800 | -0.50598500 |
| C | 3.71708200   | -1.10632500 | -0.55956600 |
| C | 3.31578800   | 0.23742700  | -0.43899000 |
| C | 1.98213000   | 0.57901000  | -0.27148100 |
| C | 0.03030000   | -3.52589200 | -1.53582800 |
| C | 0.31795600   | -3.64479100 | 0.96375100  |
| C | -4.58676100  | -1.11143700 | 0.35934000  |
| C | 5.11961400   | -1.45958500 | -0.74074200 |
| S | -5.75254800  | 0.11270900  | -0.00803600 |
| C | -7.08202900  | -0.94273000 | 0.40950200  |
| C | -6.58609400  | -2.19015500 | 0.80289200  |
| C | -5.19713100  | -2.28847100 | 0.77539600  |
| C | 5.63926500   | -2.62614100 | -1.28342100 |
| C | 7.03562000   | -2.62938600 | -1.34369700 |
| C | 7.62398700   | -1.48297200 | -0.81598400 |
| S | 6.38901700   | -0.38304300 | -0.27027200 |
| C | -8.47817900  | -0.70437600 | 0.38714200  |
| C | 9.01688800   | -1.21707500 | -0.87477400 |
| C | -9.25470600  | 0.38349300  | 0.06561600  |
| C | 9.81326100   | -0.21309900 | -0.39496200 |
| C | -10.71184400 | 0.45279300  | 0.10232900  |
| C | -11.09890200 | 1.82815100  | -0.28314000 |
| C | -9.93722400  | 2.56399400  | -0.56116100 |
| C | -8.75486700  | 1.70454600  | -0.36394600 |
| C | 11.11138400  | 0.03031500  | -1.09204300 |
| C | 11.51904100  | 1.40167700  | -0.71452200 |
| C | 10.61411400  | 1.91275900  | 0.23255700  |
| C | 9.64563300   | 0.85141700  | 0.57533000  |
| O | -7.59111700  | 2.03959300  | -0.52786400 |
| O | 11.68060700  | -0.72455900 | -1.85920500 |
| C | -11.60631300 | -0.55043000 | 0.41919400  |
| C | 8.92298700   | 0.77976500  | 1.74799500  |
| C | -12.34215900 | 2.45116900  | -0.40223600 |
| C | -12.38079000 | 3.78875700  | -0.79574000 |
| C | -11.21451300 | 4.50669100  | -1.07039800 |
| C | -9.97026200  | 3.89152500  | -0.95351200 |
| C | 12.58836600  | 2.14543600  | -1.18608000 |
| C | 12.74302900  | 3.44521600  | -0.70793900 |
| C | 11.83842700  | 3.96937600  | 0.21902400  |
| C | 10.77173300  | 3.21395700  | 0.70624100  |
| C | 8.33970200   | -0.43475300 | 2.20763500  |
| N | 7.90462900   | -1.42410800 | 2.63784900  |
| C | 8.83733300   | 1.85634300  | 2.67592700  |
| N | 8.73501800   | 2.71984200  | 3.44879400  |
| C | -13.01983600 | -0.37492500 | 0.42156300  |
| N | -14.18047800 | -0.29370500 | 0.44143500  |
| C | -11.23724000 | -1.87940300 | 0.77407900  |
| N | -10.99324600 | -2.97871600 | 1.06888200  |
| H | -0.91660000  | 1.71654700  | 0.10188400  |

|   |              |             |             |
|---|--------------|-------------|-------------|
| H | -3.32326100  | 1.28874000  | 0.36444900  |
| H | -2.65286100  | -2.95864800 | 0.02909600  |
| H | 3.04393100   | -3.16406200 | -0.56853100 |
| H | 4.05997300   | 1.02672500  | -0.49898600 |
| H | 1.69590000   | 1.62297700  | -0.18582200 |
| H | 0.88036100   | -4.19962200 | -1.68263000 |
| H | -0.87606300  | -4.13664000 | -1.47708000 |
| H | -0.04874900  | -2.87427400 | -2.41046000 |
| H | 1.17275100   | -4.31904500 | 0.85153100  |
| H | 0.44501100   | -3.07856700 | 1.89058000  |
| H | -0.58458500  | -4.25740200 | 1.05415300  |
| H | -7.24695700  | -2.99389800 | 1.10989800  |
| H | -4.64894300  | -3.17304800 | 1.07571400  |
| H | 5.01873000   | -3.42868300 | -1.66270200 |
| H | 7.62545900   | -3.43410500 | -1.76884500 |
| H | -9.01362500  | -1.59583700 | 0.69933000  |
| H | 9.55605700   | -1.89722000 | -1.53725100 |
| H | -13.27006000 | 1.93338800  | -0.19883400 |
| H | -13.34408500 | 4.28033300  | -0.88956700 |
| H | -11.28205300 | 5.54637300  | -1.37484300 |
| H | -9.04650400  | 4.42298800  | -1.15952700 |
| H | 13.27618700  | 1.71734500  | -1.90846100 |
| H | 13.56701200  | 4.05853500  | -1.05873600 |
| H | 11.96612400  | 4.98844400  | 0.57047800  |
| H | 10.08523700  | 3.65039700  | 1.42124200  |

## DBS-2DPP

|    |              |             |             |
|----|--------------|-------------|-------------|
| 0  | 1            |             |             |
| C  | 1.58255100   | 0.00321800  | 0.59599400  |
| C  | 0.63180700   | 1.05111900  | 0.58947100  |
| C  | -0.78038500  | 0.62085600  | 0.60775500  |
| C  | -0.98417500  | -0.77970500 | 0.63998900  |
| Si | 0.68584700   | -1.65437800 | 0.63571900  |
| C  | -1.88519900  | 1.47680200  | 0.59387800  |
| C  | -3.17057300  | 0.95569900  | 0.61843000  |
| C  | -3.39378800  | -0.43027600 | 0.64972100  |
| C  | -2.27638800  | -1.28520500 | 0.65488500  |
| C  | 2.93708400   | 0.30658400  | 0.58956800  |
| C  | 3.38668000   | 1.63870700  | 0.56937100  |
| C  | 2.42708400   | 2.66477600  | 0.55373100  |
| C  | 1.07027100   | 2.37877200  | 0.56853500  |
| C  | 0.97480700   | -2.70129800 | -0.89715700 |
| C  | 1.02057100   | -2.63937700 | 2.20026600  |
| C  | -4.74370700  | -0.98397200 | 0.67554400  |
| C  | 4.80897500   | 1.96463900  | 0.56955600  |
| S  | -6.09695900  | -0.07886900 | 0.09028800  |
| C  | -7.21266100  | -1.36951400 | 0.46003500  |
| C  | -6.52820100  | -2.44087000 | 1.01677200  |
| C  | -5.14664100  | -2.22216200 | 1.13752300  |
| C  | 5.41395200   | 3.13663200  | 0.98106900  |
| C  | 6.81199400   | 3.11765000  | 0.85529700  |
| C  | 7.30666100   | 1.92537900  | 0.34519900  |
| S  | 5.99051900   | 0.82394500  | 0.02562500  |
| C  | -8.61240800  | -1.20539600 | 0.18955400  |
| C  | 8.65894900   | 1.51896900  | 0.09047100  |
| N  | 9.74431300   | 2.38364900  | 0.08725600  |
| C  | 10.96312200  | 1.69808200  | -0.17547400 |
| C  | 10.56303900  | 0.32122000  | -0.32906900 |
| C  | 9.15478700   | 0.24903800  | -0.17952500 |
| C  | -9.31130100  | -0.04795400 | -0.13149400 |
| C  | -10.68570300 | -0.36157000 | -0.28544000 |
| C  | -10.85087800 | -1.77935900 | -0.08004400 |
| N  | -9.53724500  | -2.23960300 | 0.21616600  |
| C  | -9.15347100  | 1.37606900  | -0.29028700 |
| N  | -10.47872100 | 1.84635800  | -0.51284300 |
| C  | -11.39876000 | 0.80905200  | -0.50633100 |
| C  | 11.07025000  | -0.95993300 | -0.49999400 |
| N  | 9.98812900   | -1.82712800 | -0.48089000 |
| C  | 8.76007000   | -1.13273600 | -0.28981800 |
| O  | -11.81720500 | -2.52874000 | -0.14262100 |
| O  | -8.17943400  | 2.11866300  | -0.28590000 |
| C  | -12.81440000 | 0.98779700  | -0.69021800 |
| C  | -13.57992900 | 2.14220100  | -0.63964100 |
| C  | -14.95470900 | 1.91250100  | -0.86185700 |
| C  | -15.23390900 | 0.58986400  | -1.08386300 |
| S  | -13.83590500 | -0.39285100 | -1.00634800 |
| O  | 12.04237700  | 2.27111600  | -0.25486500 |
| O  | 7.67430700   | -1.69968400 | -0.27045700 |

|   |              |             |             |
|---|--------------|-------------|-------------|
| C | 9.75105100   | 3.82294900  | 0.19166900  |
| C | 9.96446300   | -3.24655500 | -0.74101900 |
| C | -9.30449900  | -3.65397800 | 0.38269300  |
| C | -10.69192100 | 3.23906100  | -0.82572100 |
| C | 12.43712300  | -1.37983000 | -0.65843600 |
| S | 13.68142700  | -0.19876200 | -0.98690600 |
| C | 14.89386600  | -1.40501900 | -1.02175800 |
| C | 14.39236700  | -2.65618000 | -0.77763000 |
| C | 12.99596600  | -2.64539000 | -0.57239700 |
| H | -1.75532200  | 2.55482000  | 0.57311700  |
| H | -4.01705200  | 1.63722700  | 0.63302800  |
| H | -2.43796300  | -2.36024800 | 0.64929500  |
| H | 3.67056800   | -0.49671800 | 0.62123300  |
| H | 2.75089700   | 3.70016900  | 0.50971300  |
| H | 0.35966800   | 3.20006400  | 0.55392200  |
| H | 0.31616200   | -3.57612900 | -0.89911100 |
| H | 0.78259400   | -2.12687100 | -1.80776900 |
| H | 2.00860300   | -3.06048800 | -0.93131100 |
| H | 2.05820000   | -2.98866900 | 2.22086300  |
| H | 0.84768500   | -2.03106900 | 3.09260100  |
| H | 0.37093300   | -3.51918000 | 2.25426100  |
| H | -7.00622300  | -3.34633700 | 1.36185100  |
| H | -4.46723700  | -2.93946100 | 1.58282100  |
| H | 4.86512100   | 3.97446600  | 1.39485600  |
| H | 7.43504600   | 3.94412600  | 1.16530000  |
| H | -13.17769600 | 3.12198900  | -0.42579500 |
| H | -15.70668600 | 2.69254300  | -0.85440900 |
| H | -16.19617000 | 0.13545600  | -1.28022000 |
| H | 10.74806300  | 4.14695000  | -0.11101100 |
| H | 9.00662800   | 4.26794200  | -0.47277500 |
| H | 9.57775800   | 4.15812400  | 1.21900600  |
| H | 10.53519700  | -3.48985500 | -1.64024100 |
| H | 10.34690600  | -3.82309200 | 0.10695400  |
| H | 8.91707700   | -3.51274400 | -0.89188600 |
| H | -10.23064900 | -4.15253500 | 0.09235600  |
| H | -8.48976800  | -3.99614900 | -0.25985700 |
| H | -9.08804900  | -3.91131700 | 1.42415300  |
| H | -11.29353200 | 3.34937000  | -1.73084600 |
| H | -11.16772100 | 3.77467800  | 0.00160100  |
| H | -9.70353700  | 3.67108100  | -0.98982700 |
| H | 15.92147200  | -1.12420800 | -1.21191300 |
| H | 15.00136600  | -3.55167100 | -0.74277100 |
| H | 12.43151000  | -3.53826400 | -0.34569600 |

## F(DPP)2B2

|     |              |             |             |
|-----|--------------|-------------|-------------|
| 0 1 |              |             |             |
| C   | -1.11560800  | -1.79419100 | -0.15507400 |
| C   | -0.52656100  | -0.61462100 | -0.64522300 |
| C   | 0.92201600   | -0.77371800 | -0.61134100 |
| C   | 1.21758900   | -2.04969100 | -0.09853300 |
| C   | -0.05496500  | -2.80795000 | 0.24348500  |
| C   | 1.95075300   | 0.09202800  | -0.98012600 |
| C   | 3.26600800   | -0.32716200 | -0.83730000 |
| C   | 3.57735800   | -1.59944700 | -0.32326700 |
| C   | 2.52859800   | -2.46114700 | 0.05084000  |
| C   | -2.48997300  | -1.91202800 | -0.07068500 |
| C   | -3.30854400  | -0.84446600 | -0.48665200 |
| C   | -2.70498400  | 0.32884600  | -0.97520400 |
| C   | -1.32496400  | 0.45262400  | -1.05437100 |
| C   | -0.12656700  | -3.12881600 | 1.74361800  |
| C   | -0.17598400  | -4.09782900 | -0.58056300 |
| C   | 4.96297200   | -2.03369500 | -0.17449900 |
| C   | -4.75984900  | -0.97131500 | -0.40720000 |
| S   | 6.25198200   | -0.88816900 | -0.03299800 |
| C   | 7.45511900   | -2.14694200 | 0.09401400  |
| C   | 6.84498100   | -3.39165100 | 0.02263500  |
| C   | 5.45052600   | -3.32533200 | -0.12862900 |
| C   | -5.51975200  | -2.12572200 | -0.38960700 |
| C   | -6.90077900  | -1.89280800 | -0.30701500 |
| C   | -7.22943900  | -0.54519800 | -0.25743200 |
| S   | -5.78019400  | 0.42511200  | -0.30657100 |
| C   | 8.84046900   | -1.79942000 | 0.23184400  |
| C   | -8.56851500  | -0.04409400 | -0.17453000 |
| N   | -8.93911300  | 1.28714700  | -0.11095100 |
| C   | -10.35341600 | 1.43878100  | -0.03394000 |

|   |              |             |             |
|---|--------------|-------------|-------------|
| C | -10.85101700 | 0.08540500  | -0.06168800 |
| C | -9.74272900  | -0.79369300 | -0.14244000 |
| C | 9.45408900   | -0.56255300 | 0.06828100  |
| C | 10.84729500  | -0.70191200 | 0.28594400  |
| C | 11.11732300  | -2.07577300 | 0.61804500  |
| N | 9.84267000   | -2.70064400 | 0.56498200  |
| C | 9.18675700   | 0.80897700  | -0.28830800 |
| N | 10.47114000  | 1.42495000  | -0.27260400 |
| C | 11.46636500  | 0.52734400  | 0.07004600  |
| C | -12.02592800 | -0.65818800 | -0.07462700 |
| N | -11.65130900 | -1.99308500 | -0.14866600 |
| C | -10.23927400 | -2.14298100 | -0.19178500 |
| O | 12.14199000  | -2.68762200 | 0.91084000  |
| O | 8.16093100   | 1.42434200  | -0.54929100 |
| C | 12.86535800  | 0.81770000  | 0.17597000  |
| C | 13.82990800  | -0.10636700 | 0.55154700  |
| C | 15.12920400  | 0.42471500  | 0.57486900  |
| C | 15.19112400  | 1.75814000  | 0.22137500  |
| S | 13.61211100  | 2.35887900  | -0.15731100 |
| O | -10.89814700 | 2.53233900  | 0.04639900  |
| O | -9.69218400  | -3.24213500 | -0.24691500 |
| C | -8.09282800  | 2.45619800  | -0.09575800 |
| C | -12.48675000 | -3.16885400 | -0.10226000 |
| C | 9.71857100   | -4.09025800 | 0.93395300  |
| C | 10.59228800  | 2.83312900  | -0.56509600 |
| C | -13.38611400 | -0.20201300 | -0.02800900 |
| S | -13.73027600 | 1.47010600  | 0.33986000  |
| C | -15.43624300 | 1.22502200  | 0.19955600  |
| C | -15.71772900 | -0.08753700 | -0.12068700 |
| C | -14.57136000 | -0.88955400 | -0.24821500 |
| C | 16.36818500  | 2.62117100  | 0.144416100 |
| C | -16.37933100 | 2.32323000  | 0.40598600  |
| C | 16.26582600  | 4.01452900  | 0.27442100  |
| C | 17.39663400  | 4.81855600  | 0.20210600  |
| C | 18.65238600  | 4.24826200  | 0.00628400  |
| C | 18.76710400  | 2.86533900  | -0.12295100 |
| C | 17.63819700  | 2.05861400  | -0.06031800 |
| C | -16.00005400 | 3.66020300  | 0.21235400  |
| C | -16.91049800 | 4.69092100  | 0.41116500  |
| C | -18.21803900 | 4.40832800  | 0.79966300  |
| C | -18.60679400 | 3.08417500  | 0.99431500  |
| C | -17.69746200 | 2.05138900  | 0.80522400  |
| H | 1.73693900   | 1.07804400  | -1.38242700 |
| H | 4.06979800   | 0.33470300  | -1.14780800 |
| H | 2.75657500   | -3.43466900 | 0.47654900  |
| H | -2.94299000  | -2.81190600 | 0.33616500  |
| H | -3.33066300  | 1.14831000  | -1.31820700 |
| H | -0.88360300  | 1.36750700  | -1.43883800 |
| H | -1.07690700  | -3.61437900 | 1.98724700  |
| H | 0.68199200   | -3.80944600 | 2.02879300  |
| H | -0.03976800  | -2.21996400 | 2.34542900  |
| H | -1.12570800  | -4.60013700 | -0.37026000 |
| H | -0.12800400  | -3.88702700 | -1.65252200 |
| H | 0.63368700   | -4.79021200 | -0.32865300 |
| H | 7.38336800   | -4.32804100 | 0.04303400  |
| H | 4.82169000   | -4.20132300 | -0.23660600 |
| H | -5.08588300  | -3.11594900 | -0.46493500 |
| H | -7.66372800  | -2.66675500 | -0.29383600 |
| H | 13.57105900  | -1.13142700 | 0.80320200  |
| H | 16.00182000  | -0.14488700 | 0.87249200  |
| H | -8.76347600  | 3.31441300  | -0.02641700 |
| H | -7.42486200  | 2.45859800  | 0.77018100  |
| H | -7.50616800  | 2.53950400  | -1.01493600 |
| H | -13.17700900 | -3.12717600 | 0.74376000  |
| H | -13.04756200 | -3.30626000 | -1.03184600 |
| H | -11.81274200 | -4.01773800 | 0.02142200  |
| H | 10.68470600  | -4.38488600 | 1.34625100  |
| H | 8.94299100   | -4.22702600 | 1.69127200  |
| H | 9.50609100   | -4.72428000 | 0.06756200  |
| H | 11.20210600  | 3.00821500  | -1.45591700 |
| H | 9.57902900   | 3.19072700  | -0.75623900 |
| H | 11.00918200  | 3.38482400  | 0.28212500  |
| H | -16.72326300 | -0.45392500 | -0.29166300 |
| H | -14.62055600 | -1.93227800 | -0.52570900 |
| H | 15.29582300  | 4.47010700  | 0.45525200  |
| H | 17.29689400  | 5.89459900  | 0.30881100  |
| H | 19.53587400  | 4.87716800  | -0.04701200 |
| H | 19.74073400  | 2.41211900  | -0.28420700 |
| H | 17.73597800  | 0.98534000  | -0.19161500 |
| H | -14.99037300 | 3.89297600  | -0.11542500 |
| H | -16.59846600 | 5.71896500  | 0.25313800  |

|   |              |            |            |
|---|--------------|------------|------------|
| H | -18.92914000 | 5.21459800 | 0.95218100 |
| H | -19.62149700 | 2.85443200 | 1.30589400 |
| H | -18.00208500 | 1.02552000 | 0.98885500 |

## ITDI

|   |              |             |             |
|---|--------------|-------------|-------------|
| 0 | 1            |             |             |
| C | 1.06458400   | -2.12073000 | -0.18799300 |
| C | 1.81095000   | -0.96015400 | 0.12297100  |
| C | 3.20104300   | -1.33576400 | 0.04759000  |
| C | 3.33504300   | -2.66796100 | -0.29432700 |
| C | 1.97702100   | -3.30869500 | -0.48375400 |
| C | -0.31393500  | -2.07455100 | -0.20574900 |
| C | -0.97966100  | -0.86935800 | 0.09897100  |
| C | -0.21936100  | 0.27304800  | 0.40742100  |
| C | 1.16786600   | 0.24042900  | 0.41879400  |
| S | 4.71343900   | -0.56299400 | 0.28048200  |
| C | 5.56042900   | -2.05045100 | -0.09631700 |
| C | 4.67332700   | -3.08094400 | -0.37892600 |
| C | 1.78784000   | -3.81525700 | -1.92108200 |
| C | 1.74962600   | -4.44932700 | 0.51925300  |
| C | 6.99368800   | -2.12234300 | -0.09154900 |
| C | 7.77640200   | -3.27303400 | -0.14825400 |
| C | 9.14287300   | -3.00058600 | -0.15142600 |
| C | 9.45397100   | -1.64344300 | -0.06174200 |
| S | 7.98478700   | -0.70490700 | -0.02750600 |
| C | -2.43687700  | -0.82684200 | 0.09614700  |
| S | -3.29768000  | 0.66511700  | -0.11407900 |
| C | -4.84363800  | -0.12281200 | 0.01904400  |
| C | -4.67292800  | -1.48242100 | 0.20397800  |
| C | -3.32389200  | -1.87580300 | 0.24601600  |
| C | -8.45851600  | 1.34481300  | -0.14250300 |
| C | -7.54068800  | 2.39641800  | -0.25311800 |
| C | -6.20841200  | 2.00270200  | -0.21007000 |
| C | -6.06564800  | 0.62507000  | -0.06495800 |
| S | -7.60175400  | -0.17377700 | 0.01434100  |
| C | 10.76907200  | -1.12921000 | -0.15442500 |
| C | -9.84803700  | 1.60632400  | -0.16410900 |
| C | 11.30869700  | 0.12832400  | -0.06534500 |
| C | -10.96931500 | 0.81358200  | -0.07130600 |
| C | 12.61189100  | 0.36638600  | -0.75152400 |
| C | 12.72484600  | 1.83470800  | -0.90209100 |
| C | 11.64024700  | 2.45355400  | -0.25640300 |
| C | 10.83966200  | 1.40983700  | 0.41847900  |
| C | -12.35642400 | 1.26125900  | -0.10451100 |
| C | -13.21184100 | 0.06152700  | 0.04142000  |
| C | -12.38905100 | -1.06904800 | 0.15409500  |
| C | -10.97517800 | -0.65288800 | 0.08777400  |
| C | 9.99871400   | 1.62076200  | 1.49275800  |
| C | -12.83583400 | 2.54923000  | -0.24375300 |
| O | 13.38999600  | -0.47841300 | -1.15602300 |
| O | -10.00683500 | -1.39584700 | 0.15407100  |
| C | 13.69334500  | 2.56119100  | -1.57459000 |
| C | 13.55997800  | 3.94783700  | -1.61666500 |
| C | 12.47664400  | 4.57179500  | -0.99349600 |
| C | 11.51070900  | 3.84033200  | -0.30166900 |
| C | -14.59735000 | -0.10034800 | 0.08284600  |
| C | -15.11203900 | -1.38789700 | 0.23556200  |
| C | -14.27869000 | -2.50314800 | 0.34569000  |
| C | -12.89485000 | -2.34897400 | 0.30503400  |
| C | 9.59447700   | 0.56546400  | 2.35824100  |
| N | 9.29844600   | -0.26612800 | 3.11607800  |
| C | 9.60129600   | 2.91736600  | 1.92603400  |
| N | 9.24584600   | 3.96183600  | 2.29550600  |
| C | -14.22195400 | 2.87609700  | -0.26459400 |
| N | -15.33862700 | 3.20262900  | -0.28878200 |
| C | -12.01420000 | 3.70403100  | -0.38354200 |
| N | -11.38783400 | 4.67821900  | -0.50053200 |
| H | -0.89022500  | -2.95520500 | -0.47467700 |
| H | -0.72616900  | 1.19885200  | 0.66478700  |
| H | 1.73356300   | 1.13374800  | 0.66474000  |
| H | 5.00298900   | -4.07799100 | -0.64774200 |
| H | 0.77843600   | -4.21631300 | -2.05573700 |
| H | 1.93965200   | -3.01099400 | -2.64593000 |
| H | 2.50045500   | -4.61688000 | -2.13905100 |
| H | 2.45802900   | -5.26344800 | 0.33655500  |
| H | 1.87986200   | -4.10209200 | 1.54773900  |
| H | 0.73778900   | -4.85343100 | 0.41619900  |
| H | 7.35639600   | -4.27074000 | -0.17717100 |



|   |              |             |             |
|---|--------------|-------------|-------------|
| H | 9.91428500   | -3.76098300 | -0.20597900 |
| H | -5.50246000  | -2.17135600 | 0.32104200  |
| H | -3.00551100  | -2.89761200 | 0.41498900  |
| H | -7.86689600  | 3.42555700  | -0.35941800 |
| H | -5.37062200  | 2.68736800  | -0.27675900 |
| H | 11.49853600  | -1.87249300 | -0.48250700 |
| H | -10.02618500 | 2.67142400  | -0.27628800 |
| H | 14.52433700  | 2.05177500  | -2.05232600 |
| H | 14.29761600  | 4.54916000  | -2.13881200 |
| H | 12.38117200  | 5.65190800  | -1.04639100 |
| H | 10.68112300  | 4.35384700  | 0.16850400  |
| H | -15.27935800 | 0.73564100  | 0.00141700  |
| H | -16.18885600 | -1.52148400 | 0.26908100  |
| H | -14.71417100 | -3.49050400 | 0.46335300  |
| H | -12.22008500 | -3.19517000 | 0.38832600  |

## CDTBM

|     |              |             |             |
|-----|--------------|-------------|-------------|
| 0 1 |              |             |             |
| C   | -1.16192400  | -1.69108900 | -0.00016100 |
| C   | -0.71262400  | -0.37244600 | 0.00001500  |
| C   | 0.71262700   | -0.37244400 | -0.00000700 |
| C   | 1.16192600   | -1.69108900 | -0.00019500 |
| C   | 0.00000200   | -2.66970400 | -0.00032900 |
| S   | 1.98545500   | 0.77089800  | 0.00004300  |
| C   | 3.17501900   | -0.52542400 | -0.00012500 |
| C   | 2.55331900   | -1.77600300 | -0.00025800 |
| C   | -2.55331800  | -1.77600100 | -0.00015600 |
| C   | -3.17501400  | -0.52542000 | 0.00002200  |
| S   | -1.98545600  | 0.77089600  | 0.00019600  |
| C   | -0.00001300  | -3.54422900 | -1.26258500 |
| C   | 0.00001800   | -3.54465000 | 1.26163400  |
| C   | 4.59308200   | -0.27783500 | -0.00006800 |
| C   | -4.59307800  | -0.27783400 | 0.00003800  |
| C   | 5.52596700   | -1.31631800 | 0.00015700  |
| C   | 6.91152600   | -1.11495500 | 0.00021400  |
| C   | 7.50054700   | 0.14846300  | 0.00006900  |
| C   | 6.58319500   | 1.25303600  | -0.00015400 |
| C   | 5.15776000   | 1.04346400  | -0.00022400 |
| C   | -5.15776000  | 1.04346500  | 0.00015500  |
| C   | -6.58319400  | 1.25303400  | 0.00016500  |
| C   | -7.50054500  | 0.14846000  | 0.00006800  |
| C   | -6.91152100  | -1.11495700 | -0.00005300 |
| C   | -5.52596100  | -1.31631800 | -0.00006500 |
| N   | -4.46229200  | 2.17904200  | 0.00034300  |
| S   | -5.53974500  | 3.39518600  | 0.00009000  |
| N   | -6.92315200  | 2.54068700  | 0.00035400  |
| N   | 6.92315000   | 2.54068900  | -0.00029600 |
| S   | 5.53974000   | 3.39518500  | -0.00056900 |
| N   | 4.46229000   | 2.17903900  | -0.00041200 |
| C   | -8.90039500  | 0.44401800  | 0.00008400  |
| C   | 8.90039600   | 0.44402200  | 0.00015800  |
| C   | -9.99017300  | -0.38673200 | 0.00008200  |
| C   | 9.99017200   | -0.38673100 | 0.00032700  |
| C   | -11.30048100 | 0.17958600  | 0.00008900  |
| N   | -12.36896100 | 0.63784900  | 0.00009600  |
| C   | -9.94048800  | -1.81088400 | 0.00007800  |
| N   | -9.91767200  | -2.97377000 | 0.00006400  |
| C   | 11.30048200  | 0.17958300  | 0.00039000  |
| N   | 12.36896300  | 0.63784500  | 0.00044300  |
| C   | 9.94048300   | -1.81088300 | 0.00044900  |
| N   | 9.91765200   | -2.97376800 | 0.00056000  |
| H   | 3.10535200   | -2.70829000 | -0.00041800 |
| H   | -3.10535300  | -2.70828700 | -0.00029000 |
| H   | -0.88531100  | -4.18717900 | -1.27852200 |
| H   | -0.00002300  | -2.93136600 | -2.16776200 |
| H   | 0.88528300   | -4.18718100 | -1.27854300 |
| H   | 0.88531700   | -4.18760500 | 1.27735600  |
| H   | 0.00002400   | -2.93209000 | 2.16701500  |
| H   | -0.88527600  | -4.18761200 | 1.27737400  |
| H   | 5.17769200   | -2.34238400 | 0.00033400  |
| H   | 7.53840600   | -1.99877700 | 0.00040500  |
| H   | -7.53839900  | -1.99878000 | -0.00012900 |
| H   | -5.17768600  | -2.34238400 | -0.00014200 |
| H   | -9.13214500  | 1.50644700  | 0.00010600  |
| H   | 9.13214700   | 1.50645000  | 0.00007400  |

# IDTBC6

|   |   |              |             |             |
|---|---|--------------|-------------|-------------|
| 0 | 1 |              |             |             |
| C |   | -1.36237100  | -0.21413900 | -0.05001900 |
| C |   | -0.83148300  | 1.09742700  | -0.04890200 |
| C |   | -0.53514600  | -1.34068800 | -0.06172200 |
| C |   | 0.83339100   | -1.13444700 | -0.07801900 |
| C |   | 1.36425600   | 0.17706500  | -0.07703000 |
| C |   | 0.53701000   | 1.30363000  | -0.06774100 |
| C |   | 1.95043300   | -2.18955400 | -0.07367000 |
| C |   | 3.17416900   | -1.28706200 | -0.05699500 |
| C |   | 2.80203900   | 0.03788700  | -0.07811200 |
| C |   | 4.57008800   | -1.47210900 | -0.04247000 |
| C |   | 5.26483000   | -0.27551300 | -0.05348100 |
| S |   | 4.15524200   | 1.08922900  | -0.08358300 |
| C |   | -1.94858000  | 2.15256800  | -0.04575000 |
| C |   | -3.17242800  | 1.24995600  | -0.05162200 |
| C |   | -2.80015200  | -0.07509600 | -0.04643300 |
| C |   | -4.56809200  | 1.43522200  | -0.02139800 |
| C |   | -5.26271100  | 0.23860000  | -0.00803000 |
| S |   | -4.15317800  | -1.12632100 | -0.01227200 |
| C |   | -1.81860900  | 3.00581300  | -1.31237100 |
| C |   | -1.98255300  | 2.99887400  | 1.23272700  |
| C |   | 1.81191500   | -3.03968900 | 1.19451000  |
| C |   | 1.99220900   | -3.03784000 | -1.35035700 |
| C |   | -0.98071600  | 4.12567300  | -1.33316300 |
| C |   | -0.79336400  | 4.85592100  | -2.50133700 |
| C |   | -1.43644500  | 4.50042700  | -3.69054800 |
| C |   | -2.26855400  | 3.37919800  | -3.66609000 |
| C |   | -2.45712600  | 2.64354100  | -2.49989300 |
| C |   | -2.78054600  | 4.14799100  | 1.28173600  |
| C |   | -2.89676800  | 4.88900100  | 2.45113400  |
| C |   | -2.22200800  | 4.51374800  | 3.61741400  |
| C |   | -1.43551500  | 3.36202400  | 3.56689900  |
| C |   | -1.31627500  | 2.61549000  | 2.39717200  |
| C |   | 0.98240400   | -4.16581000 | 1.21027100  |
| C |   | 0.78660300   | -4.89251100 | 2.37933500  |
| C |   | 1.41212300   | -4.52683000 | 3.57475700  |
| C |   | 2.23505400   | -3.39872100 | 3.55563600  |
| C |   | 2.43205500   | -2.66663700 | 2.38860900  |
| C |   | 2.79005600   | -4.18754200 | -1.39319100 |
| C |   | 2.91202600   | -4.93063400 | -2.56038500 |
| C |   | 2.24343700   | -4.55711700 | -3.73102900 |
| C |   | 1.45707400   | -3.40533500 | -3.68661100 |
| C |   | 1.33203500   | -2.65652500 | -2.51870400 |
| C |   | -1.26025600  | 5.31319900  | -4.94206200 |
| C |   | -2.32126100  | 5.33736100  | 4.87028400  |
| C |   | 1.22638000   | -5.33531200 | 4.82763000  |
| C |   | 2.35139700   | -5.38292500 | -4.98174100 |
| C |   | -12.01835900 | -0.34329600 | 0.07599900  |
| C |   | -13.33839500 | -0.98073200 | 0.06351200  |
| C |   | -14.35295800 | 0.07859800  | -0.08436900 |
| C |   | -13.70632000 | 1.32181000  | -0.04149300 |
| C |   | -12.24835600 | 1.13123300  | 0.11053300  |
| C |   | -15.74023500 | 0.03425500  | -0.23733100 |
| C |   | -16.43399400 | 1.23891200  | -0.33893500 |
| C |   | -15.77636900 | 2.47102200  | -0.28486200 |
| C |   | -14.39305100 | 2.52133500  | -0.13476500 |
| O |   | -11.43570400 | 2.03520500  | 0.20126700  |
| C |   | -13.61474600 | -2.31874800 | 0.24775000  |
| C |   | 6.70162200   | -0.02336000 | -0.06516700 |
| C |   | -6.69995300  | -0.01172500 | -0.02299500 |
| C |   | 7.18033000   | 1.11811200  | -0.73675800 |
| C |   | 8.51722600   | 1.47260800  | -0.78243700 |
| C |   | 9.45851700   | 0.62357000  | -0.13378700 |
| C |   | 8.97666100   | -0.51086900 | 0.54607100  |
| C |   | 7.63390300   | -0.85745600 | 0.60105600  |
| C |   | -7.17665000  | -1.16462700 | -0.67633900 |
| C |   | -8.51526500  | -1.51100700 | -0.73365700 |
| C |   | -9.45954400  | -0.63936400 | -0.12147400 |
| C |   | -8.97958300  | 0.50259500  | 0.54654000  |
| C |   | -7.63498900  | 0.83939800  | 0.61714900  |
| C |   | -10.84704400 | -1.02322200 | -0.13877000 |
| C |   | 10.84124100  | 1.02381700  | -0.13122300 |
| C |   | 12.01826200  | 0.37723300  | 0.14871100  |
| C |   | 13.32497500  | 1.04217100  | 0.13956500  |
| C |   | 14.36518100  | -0.00010700 | 0.07067500  |
| C |   | 13.74374800  | -1.25328700 | 0.16341700  |
| C |   | 12.27873300  | -1.08740000 | 0.26953500  |
| C |   | 15.75467800  | 0.06707100  | -0.05009000 |

|   |              |             |             |
|---|--------------|-------------|-------------|
| C | 16.47577000  | -1.12560100 | -0.07056600 |
| C | 15.84285200  | -2.36744400 | 0.03295400  |
| C | 14.45750000  | -2.44054100 | 0.15161000  |
| O | 11.48478800  | -2.00432000 | 0.39293500  |
| C | 13.56914000  | 2.39300100  | 0.26751800  |
| C | -8.91947300  | -2.76538500 | -1.45708900 |
| C | -7.24333900  | 2.06142400  | 1.39872900  |
| C | 8.92182400   | 2.71352800  | -1.52874900 |
| C | 7.24088000   | -2.07073900 | 1.39544600  |
| C | -14.93517100 | -2.85434100 | 0.22710600  |
| N | -15.99217300 | -3.34014700 | 0.21588100  |
| C | -12.63058800 | -3.31338000 | 0.52322400  |
| N | -11.87754900 | -4.16867300 | 0.75923200  |
| C | 14.87840300  | 2.95549700  | 0.25259500  |
| N | 15.92505300  | 3.46326600  | 0.24320400  |
| C | 12.55891000  | 3.37778900  | 0.47549100  |
| N | 11.78392500  | 4.22683900  | 0.65665500  |
| H | -0.95343300  | -2.34302000 | -0.05499700 |
| H | 0.95549900   | 2.30586500  | -0.07457100 |
| H | 5.05879000   | -2.43718700 | -0.06091700 |
| H | -5.05691100  | 2.40006100  | -0.04694600 |
| H | -0.47638800  | 4.43819100  | -0.42308800 |
| H | -0.13527600  | 5.72168500  | -2.48754200 |
| H | -2.78034400  | 3.07359200  | -4.57573200 |
| H | -3.10881700  | 1.77490900  | -2.51713900 |
| H | -3.31088000  | 4.47233900  | 0.39047400  |
| H | -3.52360700  | 5.77777400  | 2.45828100  |
| H | -0.90353700  | 3.03852700  | 4.45851300  |
| H | -0.69829800  | 1.72316000  | 2.39794400  |
| H | 0.49090000   | -4.48576000 | 0.29580700  |
| H | 0.13516600   | -5.76320800 | 2.36141200  |
| H | 2.73203700   | -3.08429100 | 4.47046200  |
| H | 3.07447000   | -1.79115300 | 2.41090800  |
| H | 3.31553400   | -4.51047700 | -0.49856200 |
| H | 3.53877700   | -5.81950400 | -2.56261000 |
| H | 0.92967300   | -3.08346200 | -4.58152100 |
| H | 0.71394200   | -1.76426500 | -2.52398800 |
| H | -0.26164100  | 5.75630400  | -4.99323400 |
| H | -1.41086800  | 4.70440800  | -5.83782100 |
| H | -1.98324400  | 6.13670600  | -4.98192700 |
| H | -3.31517200  | 5.78105500  | 4.97907000  |
| H | -2.11552000  | 4.73653800  | 5.76029600  |
| H | -1.59818900  | 6.16160200  | 4.85769700  |
| H | 0.22701100   | -5.77737100 | 4.87305000  |
| H | 1.94823500   | -6.15940100 | 4.87534900  |
| H | 1.37092700   | -4.72363600 | 5.72238100  |
| H | 3.36404900   | -5.77494300 | -5.11518800 |
| H | 1.67396500   | -6.24430100 | -4.94466400 |
| H | 2.09121300   | -4.79958600 | -5.86897800 |
| H | -16.28505000 | -0.89939800 | -0.28858500 |
| H | -17.51209400 | 1.21525400  | -0.46366500 |
| H | -16.34973800 | 3.38949800  | -0.36225800 |
| H | -13.85332100 | 3.46206500  | -0.09106800 |
| H | 6.46638900   | 1.74428900  | -1.26502900 |
| H | 9.69210800   | -1.13876200 | 1.06091900  |
| H | -6.45977000  | -1.80671500 | -1.18101600 |
| H | -9.69703800  | 1.14418900  | 1.04081700  |
| H | -10.98442000 | -2.06743500 | -0.39912400 |
| H | 10.97093100  | 2.05683400  | -0.43622300 |
| H | 16.28099000  | 1.00862700  | -0.13745400 |
| H | 17.55600900  | -1.08473800 | -0.16990500 |
| H | 16.43713900  | -3.27572000 | 0.01874100  |
| H | 13.93652800  | -3.38936000 | 0.23248600  |
| H | -8.04057200  | -3.27235400 | -1.86053600 |
| H | -9.42892500  | -3.47222200 | -0.79198300 |
| H | -9.59623300  | -2.55614100 | -2.29195500 |
| H | -8.03880800  | 2.33306700  | 2.09637000  |
| H | -6.32190000  | 1.90488600  | 1.96655700  |
| H | -7.08145400  | 2.92631900  | 0.74503100  |
| H | 8.04511200   | 3.20082900  | -1.96018300 |
| H | 9.41219200   | 3.44176900  | -0.87255900 |
| H | 9.61505000   | 2.49089100  | -2.34648600 |
| H | 8.03337300   | -2.33271000 | 2.10007300  |
| H | 6.31640100   | -1.90882700 | 1.95719300  |
| H | 7.08259000   | -2.94345300 | 0.75149400  |

## IDT-2B

|     |             |             |             |
|-----|-------------|-------------|-------------|
| 0 1 |             |             |             |
| C   | -0.76459900 | -1.16698100 | -0.00317300 |

|   |              |             |             |
|---|--------------|-------------|-------------|
| C | -1.36932900  | 0.11489500  | 0.00616300  |
| C | -0.61214500  | 1.29134900  | 0.00489200  |
| C | 0.76461000   | 1.16698300  | 0.00314300  |
| C | 1.36934000   | -0.11489300 | -0.00619000 |
| C | 0.61215600   | -1.29134800 | -0.00492000 |
| C | 1.81488600   | 2.28663100  | -0.01391900 |
| C | 3.08599900   | 1.45442200  | -0.04596500 |
| C | 2.79425800   | 0.09748800  | -0.02510900 |
| C | -1.81487500  | -2.28662900 | 0.01388900  |
| C | -3.08598800  | -1.45442000 | 0.04595300  |
| C | -2.79424600  | -0.09748600 | 0.02509200  |
| C | 1.60763600   | 3.13144800  | -1.27679900 |
| C | 1.82484800   | 3.13518800  | 1.26385900  |
| C | -1.60761300  | -3.13145900 | 1.27675900  |
| C | -1.82485300  | -3.13517600 | -1.26389400 |
| C | 4.45452700   | 1.69577100  | -0.05522600 |
| C | 5.22041200   | 0.51798500  | -0.04922500 |
| S | 4.17913300   | -0.90518000 | -0.02069500 |
| C | -4.45451700  | -1.69576800 | 0.05523000  |
| C | -5.22040100  | -0.51798200 | 0.04923500  |
| S | -4.17912100  | 0.90518300  | 0.02069200  |
| C | 6.63402300   | 0.59374400  | -0.06758200 |
| C | -6.63401200  | -0.59374100 | 0.06760800  |
| C | 7.64215900   | -0.34225500 | -0.06899800 |
| C | -7.64214900  | 0.34225700  | 0.06903200  |
| C | 9.07646600   | -0.07596600 | -0.09299200 |
| C | 9.76950400   | -1.38393500 | -0.07166700 |
| C | 8.80765300   | -2.40467300 | -0.04268600 |
| C | 7.45971800   | -1.80634900 | -0.04145500 |
| C | -9.07645500  | 0.07596700  | 0.09304200  |
| C | -9.76949500  | 1.38393400  | 0.07172700  |
| C | -8.80764600  | 2.40467300  | 0.04273100  |
| C | -7.45971000  | 1.80635100  | 0.04148400  |
| C | 11.12259000  | -1.72618200 | -0.07648400 |
| C | 11.46643800  | -3.07781200 | -0.05269100 |
| C | 10.49580500  | -4.08180800 | -0.02461900 |
| C | 9.14358100   | -3.74763100 | -0.01925100 |
| C | -11.12258100 | 1.72617800  | 0.07656100  |
| C | -11.46643200 | 3.07780800  | 0.05277100  |
| C | -10.49580200 | 4.08180600  | 0.02468500  |
| C | -9.14357600  | 3.74763100  | 0.01929900  |
| O | 6.40369400   | -2.42130400 | -0.02058700 |
| O | -6.40368700  | 2.42130800  | 0.02060100  |
| C | -9.71764900  | -1.14639200 | 0.13385900  |
| C | 9.71766200   | 1.14639100  | -0.13380400 |
| C | 0.70867200   | 4.20270300  | -1.27025600 |
| C | 0.44703300   | 4.92121700  | -2.43132900 |
| C | 1.07455600   | 4.60218500  | -3.63909100 |
| C | 1.96884400   | 3.52952200  | -3.64083600 |
| C | 2.23106500   | 2.80436400  | -2.48230400 |
| C | 2.58142700   | 4.31313500  | 1.29960700  |
| C | 2.67613700   | 5.06560000  | 2.46241900  |
| C | 2.01972700   | 4.67430700  | 3.63502700  |
| C | 1.27418600   | 3.49613900  | 3.59650700  |
| C | 1.17739500   | 2.73591700  | 2.43240700  |
| C | -0.70865700  | -4.20271600 | 1.27019500  |
| C | -0.44700900  | -4.92124500 | 2.43126200  |
| C | -1.07451900  | -4.60222500 | 3.63902900  |
| C | -1.96880400  | -3.52955500 | 3.64079500  |
| C | -2.23103100  | -2.80438400 | 2.48227700  |
| C | -2.58146600  | -4.31310700 | -1.29964500 |
| C | -2.67619800  | -5.06556400 | -2.46245400 |
| C | -2.01978300  | -4.67427900 | -3.63506900 |
| C | -1.27419300  | -3.49614800 | -3.59653900 |
| C | -1.17738000  | -2.73592800 | -2.43243200 |
| C | -0.81621200  | -5.40347400 | 4.88348800  |
| C | -2.10305200  | -5.50913900 | -4.88145400 |
| C | 0.81623200   | 5.40342600  | -4.88355200 |
| C | 2.10284500   | 5.50921500  | 4.88139000  |
| C | 11.13432400  | 1.29257400  | -0.15590900 |
| N | 12.28347400  | 1.47450400  | -0.17576900 |
| C | 9.05312200   | 2.40574400  | -0.16237200 |
| N | 8.56054000   | 3.46008500  | -0.18812700 |
| C | -11.13431000 | -1.29257600 | 0.15598200  |
| N | -12.28346000 | -1.47450600 | 0.17585300  |
| C | -9.05310700  | -2.40574400 | 0.16241300  |
| N | -8.56052300  | -3.46008400 | 0.18815500  |
| H | -1.09170600  | 2.26550100  | 0.00426800  |
| H | 1.09171700   | -2.26550000 | -0.00429300 |
| H | 4.92172300   | 2.67460100  | -0.06611600 |
| H | -4.92171400  | -2.67459800 | 0.06612700  |

|   |              |             |             |
|---|--------------|-------------|-------------|
| H | 6.95025400   | 1.63221300  | -0.08312800 |
| H | -6.95024200  | -1.63221000 | 0.08316100  |
| H | 11.90688600  | -0.98122500 | -0.09736800 |
| H | 12.51687600  | -3.35174500 | -0.05595400 |
| H | 10.80012300  | -5.12361000 | -0.00671000 |
| H | 8.36537600   | -4.50400000 | 0.00271200  |
| H | -11.90687600 | 0.98122100  | 0.09745700  |
| H | -12.51687100 | 3.35174000  | 0.05604800  |
| H | -10.80012100 | 5.12360700  | 0.00677800  |
| H | -8.36537300  | 4.50400100  | -0.00267500 |
| H | 0.21491000   | 4.48667900  | -0.34522500 |
| H | -0.25759200  | 5.74875200  | -2.39700400 |
| H | 2.47081900   | 3.25364800  | -4.56515300 |
| H | 2.92907300   | 1.97333400  | -2.52303400 |
| H | 3.09527000   | 4.65050900  | 0.40350900  |
| H | 3.27089100   | 5.97602400  | 2.46012200  |
| H | 0.75664500   | 3.16141000  | 4.49227300  |
| H | 0.59089100   | 1.82265400  | 2.44457800  |
| H | -0.21490400  | -4.48668500 | 0.34515700  |
| H | 0.25761300   | -5.74878200 | 2.39692100  |
| H | -2.47076800  | -3.25368900 | 4.56512000  |
| H | -2.92903400  | -1.97335000 | 2.52302000  |
| H | -3.09530800  | -4.65047400 | -0.40354400 |
| H | -3.27097100  | -5.97597700 | -2.46015700 |
| H | -0.75662400  | -3.16144400 | -4.49229800 |
| H | -0.59083400  | -1.82269200 | -2.44459700 |
| H | 0.20649900   | -5.79032800 | 4.90374100  |
| H | -0.97406200  | -4.80392600 | 5.78413800  |
| H | -1.49100500  | -6.26570900 | 4.94285100  |
| H | -3.12536600  | -5.85563400 | -5.06120900 |
| H | -1.77296100  | -4.94903600 | -5.76005500 |
| H | -1.47066500  | -6.40091700 | -4.80055900 |
| H | 1.49043300   | 6.26615200  | -4.94249400 |
| H | 0.97488900   | 4.80411500  | -5.78421500 |
| H | -0.20674500  | 5.78956500  | -4.90419300 |
| H | 3.12477400   | 5.85728300  | 5.06025000  |
| H | 1.46898300   | 6.40000700  | 4.80112000  |
| H | 1.77438100   | 4.94855800  | 5.76025000  |

## SiIDT-IC

|     |             |             |             |
|-----|-------------|-------------|-------------|
| 0 1 |             |             |             |
| C   | -0.47726400 | 1.33102100  | -0.00018700 |
| C   | -1.36881400 | 0.22524300  | -0.00012100 |
| C   | -0.89006900 | -1.09257200 | -0.00002600 |
| C   | 0.47705900  | -1.33076000 | 0.00000800  |
| C   | 1.36861100  | -0.22498200 | -0.00005400 |
| C   | 0.88986600  | 1.09283200  | -0.00015400 |
| Si  | 1.46006600  | -2.95395300 | 0.00014600  |
| C   | 3.07409700  | -1.98785600 | 0.00010000  |
| C   | 2.76845500  | -0.62311300 | -0.00000100 |
| Si  | -1.46027200 | 2.95421300  | -0.00030000 |
| C   | -3.07430400 | 1.98811700  | -0.00023100 |
| C   | -2.76865700 | 0.62337400  | -0.00014900 |
| C   | -1.19524900 | 3.97094600  | -1.55374700 |
| C   | 1.19500700  | -3.97067100 | 1.55359700  |
| C   | 1.19507100  | -3.97092600 | -1.55315000 |
| C   | -1.19524100 | 3.97116800  | 1.55300100  |
| C   | 4.45482900  | -2.18386200 | 0.00013500  |
| C   | 5.21362900  | -1.00321100 | 0.00006800  |
| S   | 4.15195300  | 0.39535200  | -0.00004200 |
| C   | -4.45503600 | 2.18412500  | -0.00022700 |
| C   | -5.21382300 | 1.00346500  | -0.00014800 |
| S   | -4.15214900 | -0.39509600 | -0.00008300 |
| C   | 6.62777500  | -1.06784800 | 0.00008100  |
| C   | -6.62796700 | 1.06801400  | -0.00008200 |
| C   | 7.62876500  | -0.12449700 | 0.00003700  |
| C   | -7.62879500 | 0.12450600  | 0.00000100  |
| C   | -9.06497500 | 0.38134100  | 0.00010000  |
| C   | -9.74903400 | -0.93151300 | -0.00003000 |
| C   | -8.78025700 | -1.94599600 | -0.00011700 |
| C   | -7.43562600 | -1.33904800 | -0.00008100 |
| C   | 9.06491200  | -0.38157500 | 0.00005200  |
| C   | 9.74920400  | 0.93114200  | 0.00006800  |
| C   | 8.78062800  | 1.94580600  | 0.00003300  |
| C   | 7.43588500  | 1.33910100  | 0.00000300  |
| C   | 11.10012400 | 1.28192300  | 0.00010700  |
| C   | 11.43524200 | 2.63588500  | 0.00010800  |
| C   | 10.45806400 | 3.63386100  | 0.00006900  |

|   |              |             |             |
|---|--------------|-------------|-------------|
| C | 9.10804100   | 3.29106000  | 0.00003200  |
| C | -11.09988300 | -1.28258500 | -0.00006800 |
| C | -11.43472300 | -2.63661600 | -0.00018400 |
| C | -10.45734600 | -3.63439600 | -0.00025900 |
| C | -9.10739700  | -3.29131700 | -0.00022700 |
| O | -6.37631700  | -1.94811200 | -0.00012800 |
| C | -9.71509000  | 1.59975000  | 0.00033600  |
| O | 6.37670800   | 1.94839100  | -0.00003600 |
| C | 9.71495500   | -1.60002100 | 0.00003300  |
| C | -11.13296300 | 1.73616300  | 0.00042900  |
| N | -12.28356300 | 1.90979800  | 0.00051300  |
| C | -9.05919000  | 2.86401200  | 0.00054800  |
| N | -8.57280200  | 3.92156300  | 0.00072900  |
| C | 11.13283100  | -1.73640000 | 0.00004800  |
| N | 12.28347000  | -1.90977700 | 0.00006600  |
| C | 9.05907700   | -2.86429400 | -0.00001600 |
| N | 8.57288700   | -3.92193600 | -0.00007000 |
| H | -1.59359400  | -1.92272500 | 0.00002400  |
| H | 1.59339000   | 1.92298600  | -0.00020200 |
| H | -1.89043300  | 4.81614700  | -1.58286200 |
| H | -0.17720900  | 4.37268000  | -1.58271500 |
| H | -1.35122500  | 3.36764200  | -2.45236300 |
| H | 1.89017200   | -4.81588700 | 1.58272500  |
| H | 0.17695800   | -4.37238300 | 1.58255600  |
| H | 1.35098600   | -3.36736600 | 2.45221100  |
| H | 1.35104200   | -3.36775700 | -2.45185600 |
| H | 1.89027200   | -4.81611700 | -1.58213000 |
| H | 0.17703900   | -4.37268500 | -1.58206400 |
| H | -0.17719100  | 4.37287900  | 1.58192100  |
| H | -1.89040300  | 4.81639200  | 1.58198400  |
| H | -1.35124300  | 3.36800000  | 2.45170400  |
| H | 4.94197000   | -3.15428300 | 0.00020500  |
| H | -4.94218100  | 3.15454500  | -0.00026700 |
| H | 6.95175600   | -2.10412400 | 0.00014100  |
| H | -6.95208000  | 2.10425500  | -0.00010600 |
| H | 11.88908800  | 0.54156200  | 0.00013800  |
| H | 12.48396500  | 2.91644500  | 0.00013900  |
| H | 10.75560300  | 4.67781300  | 0.00007000  |
| H | 8.32463200   | 4.04238900  | 0.00000200  |
| H | -11.88900700 | -0.54240500 | -0.00001600 |
| H | -12.48338900 | -2.91738900 | -0.00021800 |
| H | -10.75467300 | -4.67840800 | -0.00034600 |
| H | -8.32383500  | -4.04248700 | -0.00028800 |

## IFBR-d

|   |             |             |             |
|---|-------------|-------------|-------------|
| 0 |             |             |             |
| 1 |             |             |             |
| C | 1.39874600  | -0.05815600 | 0.41782000  |
| C | 0.71986500  | 1.18366600  | 0.37436200  |
| C | 0.70862400  | -1.27274600 | 0.47624400  |
| C | -0.67389400 | -1.22661000 | 0.48295100  |
| C | -1.35364900 | 0.01510100  | 0.45347800  |
| C | -0.66255700 | 1.22998800  | 0.40325600  |
| C | -1.65861200 | -2.40339000 | 0.55262700  |
| C | -2.97732400 | -1.64681300 | 0.57411200  |
| C | -2.76427700 | -0.28539300 | 0.50146100  |
| C | -4.33659400 | -1.98356300 | 0.60448000  |
| C | -5.16520200 | -0.86883900 | 0.56295800  |
| S | -4.22324200 | 0.61200800  | 0.46253200  |
| C | 1.70654500  | 2.35983300  | 0.32978000  |
| C | 3.02656600  | 1.60618500  | 0.37393600  |
| C | 2.80842400  | 0.24549300  | 0.40507200  |
| C | 4.38846400  | 1.94935300  | 0.35287200  |
| C | 5.21387000  | 0.83500800  | 0.37285300  |
| S | 4.26933700  | -0.64987600 | 0.40930800  |
| C | 1.47054200  | 3.24855400  | 1.55611600  |
| C | 1.65266800  | 3.15340600  | -0.98218000 |
| C | -1.63496800 | -3.29276300 | -0.69657700 |
| C | -1.38836500 | -3.19138300 | 1.83954500  |
| C | 0.51874900  | 4.27226100  | 1.51605700  |
| C | 0.23811100  | 5.03093200  | 2.64706700  |
| C | 0.89868600  | 4.80069800  | 3.85711700  |
| C | 1.84574100  | 3.77466300  | 3.89310400  |
| C | 2.12753700  | 3.01032800  | 2.76488600  |
| C | 2.35848100  | 4.35838700  | -1.08384900 |
| C | 2.39905500  | 5.06511100  | -2.27847600 |
| C | 1.73559200  | 4.59961700  | -3.41906000 |
| C | 1.03839300  | 3.39578600  | -3.31499800 |
| C | 0.99605600  | 2.68207200  | -2.11886100 |

|   |              |             |             |
|---|--------------|-------------|-------------|
| C | -2.31230000  | -4.51822700 | -0.68448000 |
| C | -2.37938400  | -5.30983200 | -1.82377300 |
| C | -1.77323100  | -4.91163500 | -3.02014500 |
| C | -1.10600200  | -3.68625800 | -3.03004100 |
| C | -1.03687200  | -2.88824200 | -1.89013200 |
| C | -0.44271700  | -4.22150900 | 1.85699500  |
| C | -0.13101300  | -4.88486400 | 3.03872100  |
| C | -0.75201100  | -4.54882100 | 4.24498600  |
| C | -1.69157600  | -3.51552900 | 4.22364400  |
| C | -2.00486000  | -2.84687400 | 3.04411900  |
| C | 0.62000400   | 5.64559500  | 5.06806900  |
| C | 1.75477600   | 5.38444500  | -4.70029900 |
| C | -1.81938200  | -5.78670800 | -4.24073800 |
| C | -0.43964800  | -5.29208500 | 5.51303700  |
| C | -6.61122300  | -0.87776100 | 0.60763400  |
| C | 6.65799600   | 0.77536800  | 0.36320600  |
| C | -7.32298400  | -2.03612900 | 0.87748500  |
| C | -8.72571000  | -2.05949600 | 0.89051800  |
| C | -9.55508100  | -0.98726000 | 0.61404600  |
| C | -8.85910300  | 0.24472800  | 0.40254600  |
| C | -7.41413900  | 0.29605500  | 0.39273500  |
| C | 7.48487300   | 1.95745300  | 0.33791600  |
| C | 8.92559700   | 1.84948000  | 0.32006700  |
| C | 9.60128800   | 0.58671500  | 0.30596000  |
| C | 8.75365900   | -0.50261800 | 0.37408700  |
| C | 7.34913800   | -0.42402400 | 0.39057100  |
| N | -9.42398600  | 1.44091200  | 0.25857700  |
| S | -8.21748100  | 2.51703200  | 0.09084600  |
| N | -6.93559300  | 1.52410500  | 0.21090600  |
| C | -10.99059000 | -1.14378800 | 0.69728700  |
| C | -11.94021700 | -0.54979200 | -0.06133500 |
| S | -13.65889900 | -0.66569100 | 0.29701300  |
| C | -14.09951200 | 0.25925800  | -1.12511700 |
| N | -12.99016400 | 0.58787100  | -1.84107300 |
| C | -11.74856900 | 0.15826400  | -1.34341500 |
| S | -15.66652000 | 0.63502300  | -1.48364000 |
| C | -13.03634000 | 1.34833300  | -3.08753200 |
| C | -12.90627300 | 2.84238100  | -2.84324900 |
| O | -10.71374900 | 0.31467500  | -1.95671700 |
| N | 7.06201900   | 3.21990100  | 0.33814300  |
| S | 8.38187300   | 4.16816000  | 0.32095400  |
| N | 9.54475500   | 3.02822200  | 0.30347500  |
| C | 11.04405000  | 0.55528000  | 0.36934500  |
| C | 11.90206700  | -0.31868100 | -0.20683100 |
| S | 13.63333400  | -0.29694200 | 0.10923500  |
| C | 13.94528800  | -1.55890800 | -1.06539300 |
| N | 12.78777900  | -1.94109900 | -1.67170400 |
| C | 11.60398000  | -1.30450800 | -1.26505300 |
| S | 15.46056400  | -2.14874400 | -1.34853900 |
| C | 12.72901000  | -2.96974100 | -2.70771400 |
| C | 12.52085300  | -4.35659400 | -2.12264200 |
| O | 10.53178000  | -1.53116600 | -1.78667800 |
| F | 9.26163000   | -1.72589500 | 0.49324300  |
| F | -9.29455300  | -3.23754700 | 1.17019000  |
| H | 1.24111000   | -2.21835600 | 0.51876400  |
| H | -1.19478400  | 2.17660200  | 0.39166500  |
| H | -4.71278300  | -2.99890600 | 0.63796600  |
| H | 4.78640200   | 2.95484900  | 0.32478700  |
| H | -0.00267100  | 4.48670100  | 0.58744700  |
| H | -0.50783500  | 5.82001200  | 2.58693700  |
| H | 2.37412100   | 3.56767300  | 4.82078500  |
| H | 2.86735000   | 2.21785600  | 2.82964900  |
| H | 2.87701700   | 4.75217600  | -0.21390700 |
| H | 2.95668400   | 5.99752000  | -2.32717300 |
| H | 0.51575200   | 3.00420600  | -4.18451600 |
| H | 0.44486800   | 1.74786200  | -2.07866700 |
| H | -2.78504300  | -4.86246500 | 0.23150800  |
| H | -2.91243000  | -6.25695500 | -1.78366200 |
| H | -0.62893700  | -3.34500400 | -3.94570700 |
| H | -0.51090000  | -1.93991600 | -1.93829900 |
| H | 0.04905300   | -4.51705800 | 0.93453200  |
| H | 0.60865100   | -5.68195000 | 3.02206200  |
| H | -2.18836400  | -3.22593700 | 5.14668500  |
| H | -2.73639400  | -2.04436400 | 3.06519100  |
| H | -0.40938900  | 6.01470100  | 5.06890100  |
| H | 0.78359200   | 5.08452000  | 5.99236100  |
| H | 1.27956500   | 6.52115000  | 5.09763800  |
| H | 2.72541900   | 5.86292700  | -4.86049500 |
| H | 1.54116600   | 4.74694500  | -5.56237300 |
| H | 1.00050900   | 6.18013900  | -4.68571200 |
| H | -1.04681300  | -6.56355500 | -4.19737100 |

|   |              |             |             |
|---|--------------|-------------|-------------|
| H | -2.78361400  | -6.29550200 | -4.33094000 |
| H | -1.65097000  | -5.20831000 | -5.15300400 |
| H | 0.59540000   | -5.64506300 | 5.52410900  |
| H | -0.59650100  | -4.66296700 | 6.39353000  |
| H | -1.08432300  | -6.17238000 | 5.62211100  |
| H | -6.82058700  | -2.97157400 | 1.09272800  |
| H | 6.82323700   | -1.37185800 | 0.44369100  |
| H | -11.33280700 | -1.82636800 | 1.47338900  |
| H | -12.20965400 | 0.97653100  | -3.69646900 |
| H | -13.98099800 | 1.10418500  | -3.57706300 |
| H | -12.93424800 | 3.37324500  | -3.79875700 |
| H | -13.72728300 | 3.20962300  | -2.22206200 |
| H | -11.95807800 | 3.07357400  | -2.35050700 |
| H | 11.47921900  | 1.36864600  | 0.94858500  |
| H | 11.89941900  | -2.68996500 | -3.36012200 |
| H | 13.66294200  | -2.91118900 | -3.26987600 |
| H | 12.47659100  | -5.09115000 | -2.93139500 |
| H | 13.34503000  | -4.62784100 | -1.45790800 |
| H | 11.58258600  | -4.40655300 | -1.56380200 |

## IDIDT-C8

0 1

|   |              |             |             |
|---|--------------|-------------|-------------|
| C | -4.18491500  | -1.71369200 | -0.02138900 |
| C | -2.83441500  | -1.45841900 | 0.08234400  |
| C | -2.38077300  | -0.19284500 | 0.51190400  |
| C | -3.28832300  | 0.81534600  | 0.83751900  |
| C | -4.64535300  | 0.54887700  | 0.73260300  |
| C | -5.11775200  | -0.70645100 | 0.30599600  |
| C | -1.66816300  | -2.39817600 | -0.21453900 |
| C | -0.48079400  | -1.49101300 | 0.08649000  |
| C | -0.94284000  | -0.25230000 | 0.50653200  |
| C | 0.93697100   | -1.53580800 | 0.07946800  |
| C | 1.48065100   | -0.33181900 | 0.50278000  |
| S | 0.30754700   | 0.86883400  | 0.90480000  |
| C | 2.06162600   | -2.50418300 | -0.26782200 |
| C | 3.28767200   | -1.65719200 | 0.06543100  |
| C | 2.91942900   | -0.36876900 | 0.50900800  |
| C | 4.61790200   | -2.00403000 | -0.03543400 |
| C | 5.61483000   | -1.06789100 | 0.31289700  |
| C | 5.22818100   | 0.21140800  | 0.75281200  |
| C | 3.89211100   | 0.57050800  | 0.85177600  |
| C | -1.72800200  | -3.60996000 | 0.72885200  |
| C | -1.71128200  | -2.86155800 | -1.67726000 |
| C | 2.07389200   | -2.86527600 | -1.76190100 |
| C | 2.04320800   | -3.77784300 | 0.58812900  |
| C | -6.54384400  | -0.97800900 | 0.20187400  |
| C | 7.01852700   | -1.43797900 | 0.21811600  |
| S | -7.69676600  | 0.30608100  | 0.07335800  |
| C | -9.03480400  | -0.81828700 | 0.01663700  |
| C | -8.54952100  | -2.12928300 | 0.08456900  |
| C | -7.16477700  | -2.22259800 | 0.18650700  |
| C | 7.56578300   | -2.71437200 | 0.20641800  |
| C | 8.95720600   | -2.71531200 | 0.08641900  |
| C | 9.51929300   | -1.44161200 | 0.03356500  |
| S | 8.25942600   | -0.23977600 | 0.08663400  |
| C | -10.42559600 | -0.57711900 | -0.08576600 |
| C | 10.89729600  | -1.19967900 | -0.19504300 |
| C | -11.19403300 | 0.56144400  | -0.16062600 |
| C | -12.64799600 | 0.62395500  | -0.25759300 |
| C | -13.02792800 | 2.05449200  | -0.29083200 |
| C | -11.86293400 | 2.83319000  | -0.22746700 |
| C | -10.68581800 | 1.94709600  | -0.14775300 |
| C | 11.67218000  | -0.07124700 | -0.24043700 |
| C | 12.93851000  | -0.13984400 | -1.02789400 |
| C | 13.31762000  | 1.26405400  | -1.30278500 |
| C | 12.42772900  | 2.12563400  | -0.63789100 |
| C | 11.49982500  | 1.30760700  | 0.17112900  |
| O | 13.50538500  | -1.14599200 | -1.41320000 |
| O | -9.52075900  | 2.30998200  | -0.08391500 |
| C | 10.80862600  | 1.74960800  | 1.28024500  |
| C | -13.54660100 | -0.42340000 | -0.31508600 |
| C | -14.26723100 | 2.69161600  | -0.36864500 |
| C | -14.29812200 | 4.08608000  | -0.38100000 |
| C | -13.12840500 | 4.84667600  | -0.31838900 |
| C | -11.88815100 | 4.21742900  | -0.24029800 |
| C | 14.34961400  | 1.73970700  | -2.09472800 |
| C | 14.48161500  | 3.11945700  | -2.23865800 |
| C | 13.59180900  | 3.98441900  | -1.59696200 |



|   |              |             |             |
|---|--------------|-------------|-------------|
| C | 12.56294200  | 3.50484000  | -0.78599100 |
| C | 10.27373800  | 0.85404900  | 2.24891000  |
| N | 9.87884000   | 0.14948400  | 3.08614200  |
| C | 10.71083000  | 3.12418700  | 1.63856800  |
| N | 10.59858200  | 4.23936500  | 1.95060000  |
| C | -14.95687400 | -0.24757400 | -0.41074700 |
| N | -16.11500500 | -0.16580300 | -0.48925200 |
| C | -13.18284100 | -1.80012300 | -0.29016400 |
| N | -12.93928500 | -2.93830200 | -0.27378400 |
| H | -4.53574900  | -2.67847000 | -0.37631500 |
| H | -2.94759000  | 1.78937800  | 1.17499700  |
| H | -5.35644400  | 1.32258800  | 1.00779600  |
| H | 4.90447100   | -2.98589800 | -0.40182100 |
| H | 5.98927300   | 0.92837000  | 1.04767200  |
| H | 3.61761500   | 1.56092200  | 1.20152100  |
| H | -0.89589700  | -4.29215500 | 0.53931900  |
| H | -1.68913900  | -3.29725700 | 1.77573700  |
| H | -2.65720400  | -4.16588700 | 0.56936100  |
| H | -0.89295500  | -3.55474300 | -1.88843600 |
| H | -2.64919800  | -3.38788700 | -1.87995800 |
| H | -1.63653000  | -2.01451600 | -2.36434900 |
| H | 1.19730000   | -3.46162000 | -2.02634700 |
| H | 2.08199300   | -1.96656000 | -2.38445900 |
| H | 2.96356000   | -3.45676700 | -1.99950900 |
| H | 1.17825600   | -4.39925400 | 0.34270300  |
| H | 2.94171100   | -4.37289100 | 0.39757800  |
| H | 2.00867500   | -3.53829400 | 1.65422600  |
| H | -9.21788800  | -2.98395400 | 0.07084000  |
| H | -6.62884300  | -3.15936500 | 0.27907100  |
| H | 6.96901500   | -3.61287500 | 0.30376800  |
| H | 9.56564300   | -3.61248200 | 0.05093700  |
| H | -10.96663300 | -1.51822800 | -0.10464400 |
| H | 11.44163100  | -2.08977200 | -0.51723400 |
| H | -15.19733500 | 2.14113800  | -0.41843300 |
| H | -15.25844200 | 4.58880200  | -0.44093800 |
| H | -13.19024500 | 5.93036900  | -0.33039400 |
| H | -10.96104200 | 4.77974000  | -0.18982300 |
| H | 15.02579200  | 1.04626200  | -2.58481800 |
| H | 15.27609000  | 3.52799200  | -2.85527300 |
| H | 13.70100600  | 5.05627900  | -1.73004700 |
| H | 11.88767300  | 4.20158000  | -0.30481000 |

## IC-IDT-IC

0 1

|   |             |             |             |
|---|-------------|-------------|-------------|
| C | -1.37016900 | 0.10286900  | 0.00430600  |
| C | -0.75424800 | -1.17383900 | -0.00098400 |
| C | -0.62350600 | 1.28615200  | 0.00098100  |
| C | 0.75421000  | 1.17384500  | 0.00130900  |
| C | 1.37012900  | -0.10286300 | -0.00398700 |
| C | 0.62346700  | -1.28614500 | -0.00065600 |
| C | 1.79443400  | 2.30271100  | -0.01741700 |
| C | 3.07288900  | 1.48169600  | -0.04688000 |
| C | 2.79286500  | 0.12182100  | -0.02210400 |
| C | 4.43881400  | 1.73502000  | -0.05681600 |
| C | 5.21503500  | 0.56343600  | -0.04679400 |
| S | 4.18598000  | -0.86880500 | -0.01389600 |
| C | -1.79446900 | -2.30271200 | 0.01766000  |
| C | -3.07292400 | -1.48170200 | 0.04704200  |
| C | -2.79290700 | -0.12182400 | 0.02233500  |
| C | -4.43884500 | -1.73504300 | 0.05684200  |
| C | -5.21507700 | -0.56346700 | 0.04680000  |
| S | -4.18603400 | 0.86878700  | 0.01404300  |
| C | -1.58051000 | -3.14327300 | 1.28232100  |
| C | -1.79585700 | -3.15399600 | -1.25845100 |
| C | 1.58039400  | 3.14326200  | -1.28207300 |
| C | 1.79594200  | 3.15403500  | 1.25866300  |
| C | -0.67310100 | -4.20740200 | 1.27768700  |
| C | -0.40563400 | -4.92162600 | 2.44018700  |
| C | -1.03554100 | -4.60518300 | 3.64746300  |
| C | -1.93818100 | -3.53937800 | 3.64730300  |
| C | -2.20628400 | -2.81854900 | 2.48733500  |
| C | -2.54570100 | -4.33622100 | -1.29359400 |
| C | -2.63190800 | -5.09260200 | -2.45469600 |
| C | -1.97323000 | -4.70109400 | -3.62595800 |
| C | -1.23480400 | -3.51823100 | -3.58823400 |
| C | -1.14657800 | -2.75419400 | -2.42594600 |
| C | 0.67311300  | 4.20751000  | -1.27733300 |
| C | 0.40556600  | 4.92173000  | -2.43980800 |

|   |              |             |             |
|---|--------------|-------------|-------------|
| C | 1.03525500   | 4.60516200  | -3.64717500 |
| C | 1.93776000   | 3.53925500  | -3.64711600 |
| C | 2.20595000   | 2.81842400  | -2.48715900 |
| C | 2.54621700   | 4.33604000  | 1.29377700  |
| C | 2.63255000   | 5.09249400  | 2.45476500  |
| C | 1.97359300   | 4.70131000  | 3.62603600  |
| C | 1.23465600   | 3.51882200  | 3.58830000  |
| C | 1.14631800   | 2.75464500  | 2.42605400  |
| C | -0.77080600  | -5.40193600 | 4.89345900  |
| C | -2.04461700  | -5.54080600 | -4.86981200 |
| C | 0.77037500   | 5.40192400  | -4.89313600 |
| C | 2.04593400   | 5.54092700  | 4.86990100  |
| C | 6.62698900   | 0.64942200  | -0.06540600 |
| C | -6.62703300  | -0.64946600 | 0.06529200  |
| C | 7.64582300   | -0.27641700 | -0.06381300 |
| C | -7.64587500  | 0.27636400  | 0.06365100  |
| C | 9.07340300   | 0.03277600  | -0.09035000 |
| C | 9.78251400   | -1.24796600 | -0.07195600 |
| C | 8.83556000   | -2.31370700 | -0.03792000 |
| C | 7.47680300   | -1.75128600 | -0.03276500 |
| C | -9.07345400  | -0.03284100 | 0.09006200  |
| C | -9.78257400  | 1.24789600  | 0.07162600  |
| C | -8.83562600  | 2.31364500  | 0.03769800  |
| C | -7.47686400  | 1.75123600  | 0.03265600  |
| C | 11.07828200  | -1.69638400 | -0.07907500 |
| S | 11.11358300  | -3.41661200 | -0.04377200 |
| C | 9.39780200   | -3.55379000 | -0.01928000 |
| C | -11.07834700 | 1.69630300  | 0.07863300  |
| S | -11.11365900 | 3.41653200  | 0.04336000  |
| C | -9.39787700  | 3.55372400  | 0.01903200  |
| O | 6.42147500   | -2.36596900 | -0.00787400 |
| O | -6.42153900  | 2.36592900  | 0.00787400  |
| C | -9.71065000  | -1.25831600 | 0.12857700  |
| C | 9.71060600   | 1.25824600  | -0.12893000 |
| C | -9.05487200  | -2.51929400 | 0.15185900  |
| N | -8.55613500  | -3.57107400 | 0.17260400  |
| C | -11.13044900 | -1.34333200 | 0.15067500  |
| N | -12.29136000 | -1.42362900 | 0.16924700  |
| C | 9.05483500   | 2.51923000  | -0.15215700 |
| N | 8.55610400   | 3.57101300  | -0.17285800 |
| C | 11.13040300  | 1.34325000  | -0.15115500 |
| N | 12.29131300  | 1.42353800  | -0.16983000 |
| H | -1.11174800  | 2.25593200  | -0.00234300 |
| H | 1.11171000   | -2.25592400 | 0.00263800  |
| H | 4.89742700   | 2.71780600  | -0.07132600 |
| H | -4.89743900  | -2.71784000 | 0.07126500  |
| H | -0.17682100  | -4.48915100 | 0.35333600  |
| H | 0.30550200   | -5.74361400 | 2.40733800  |
| H | -2.44209100  | -3.26551100 | 4.57115100  |
| H | -2.91076800  | -1.99293400 | 2.52686400  |
| H | -3.06128800  | -4.67404700 | -0.39866700 |
| H | -3.22154900  | -6.00631900 | -2.45198200 |
| H | -0.71604400  | -3.18295900 | -4.48308600 |
| H | -0.56516300  | -1.83769600 | -2.43886200 |
| H | 0.17700100   | 4.48933600  | -0.35291600 |
| H | -0.30546000  | 5.74381000  | -2.40687900 |
| H | 2.44150200   | 3.26530000  | -4.57102800 |
| H | 2.91033000   | 1.99272300  | -2.52676400 |
| H | 3.06195600   | 4.67362200  | 0.39884400  |
| H | 3.22246800   | 6.00603600  | 2.45200200  |
| H | 0.71553000   | 3.18391400  | 4.48307300  |
| H | 0.56447000   | 1.83842500  | 2.43898100  |
| H | 0.25383400   | -5.78363900 | 4.91259000  |
| H | -0.93032400  | -4.80099400 | 5.79287000  |
| H | -1.44111600  | -6.26742500 | 4.95607700  |
| H | -3.05631800  | -5.92345800 | -5.03483200 |
| H | -1.74561600  | -4.97146400 | -5.75363400 |
| H | -1.37990800  | -6.40946000 | -4.79598800 |
| H | -0.25490600  | 5.78187800  | -4.91311600 |
| H | 1.43922800   | 6.26860900  | -4.95475900 |
| H | 0.93178400   | 4.80159300  | -5.79261100 |
| H | 3.06078500   | 5.91232200  | 5.04147400  |
| H | 1.39168400   | 6.41702700  | 4.79114500  |
| H | 1.73487700   | 4.97544800  | 5.75201300  |
| H | 6.93839900   | 1.68998800  | -0.08518300 |
| H | -6.93843600  | -1.69003500 | 0.08500400  |
| H | 12.00693700  | -1.14457400 | -0.10218900 |
| H | 8.92085300   | -4.52404000 | 0.00676400  |
| H | -12.00699900 | 1.14448500  | 0.10165000  |
| H | -8.92093400  | 4.52397900  | -0.00694900 |

# IDT-OB

|   |   |              |             |             |
|---|---|--------------|-------------|-------------|
| 0 | 1 |              |             |             |
| C |   | 0.73220900   | -1.09818400 | 0.44474500  |
| C |   | 1.37284100   | 0.08851800  | 0.00482800  |
| C |   | 0.64626600   | 1.19818700  | -0.44151300 |
| C |   | -0.73219600  | 1.09812100  | -0.44473800 |
| C |   | -1.37282800  | -0.08858200 | -0.00482200 |
| C |   | -0.64625200  | -1.19825000 | 0.44152000  |
| C |   | -1.74581100  | 2.14713800  | -0.90944700 |
| C |   | -3.04039400  | 1.41318200  | -0.62128300 |
| C |   | -2.79111900  | 0.13906700  | -0.12596100 |
| C |   | 1.74582400   | -2.14720000 | 0.90945800  |
| C |   | 3.04040700   | -1.41324500 | 0.62129400  |
| C |   | 2.79113200   | -0.13913000 | 0.12597000  |
| C |   | -1.63021500  | 3.43397100  | -0.09006400 |
| C |   | -1.59797400  | 2.37083300  | -2.42257800 |
| C |   | 1.63022800   | -3.43403700 | 0.09008000  |
| C |   | 1.59798500   | -2.37089000 | 2.42258900  |
| C |   | -4.39917100  | 1.67197700  | -0.74450700 |
| C |   | -5.20343400  | 0.59168100  | -0.34224900 |
| S |   | -4.20863000  | -0.76221100 | 0.19616200  |
| C |   | 4.39918400   | -1.67204000 | 0.74452100  |
| C |   | 5.20344500   | -0.59174400 | 0.34226300  |
| S |   | 4.20864300   | 0.76214900  | -0.19615000 |
| C |   | -6.61299100  | 0.69654900  | -0.40861400 |
| C |   | 6.61300100   | -0.69659500 | 0.40863100  |
| C |   | -7.65281500  | -0.14942600 | -0.09744800 |
| C |   | 7.65279600   | 0.14941100  | 0.09745900  |
| C |   | -9.07647600  | 0.13721500  | -0.23401400 |
| C |   | -9.81527800  | -1.05160400 | 0.24823300  |
| C |   | -8.88974300  | -2.02626100 | 0.65000400  |
| C |   | -7.52141700  | -1.51238400 | 0.45170500  |
| C |   | 9.07647600   | -0.13715700 | 0.23401200  |
| C |   | 9.81520800   | 1.05168900  | -0.24826700 |
| C |   | 8.88962100   | 2.02629700  | -0.65003700 |
| C |   | 7.52132300   | 1.51235900  | -0.45170200 |
| C |   | -11.17950600 | -1.32646800 | 0.35388900  |
| C |   | -11.57069300 | -2.56720300 | 0.85738800  |
| C |   | -10.63593200 | -3.52701800 | 1.25181800  |
| C |   | -9.27274500  | -3.25946100 | 1.14936300  |
| C |   | 11.17942200  | 1.32661100  | -0.35395000 |
| C |   | 11.57054400  | 2.56735600  | -0.85747600 |
| C |   | 10.63573200  | 3.52712300  | -1.25190500 |
| C |   | 9.27255800   | 3.25950700  | -1.14942200 |
| O |   | -6.48756600  | -2.11421100 | 0.70268200  |
| O |   | 6.48743700   | 2.11412700  | -0.70267600 |
| C |   | 9.67443500   | -1.28238500 | 0.72234800  |
| C |   | -9.67434000  | 1.28249700  | -0.72233800 |
| C |   | -1.39355800  | 4.67870600  | -0.66859300 |
| C |   | -1.29517000  | 5.82610400  | 0.12026300  |
| C |   | -1.42856500  | 5.76837900  | 1.50569400  |
| C |   | -1.66522500  | 4.51397500  | 2.08399600  |
| C |   | -1.76407400  | 3.37258400  | 1.30373200  |
| C |   | 1.39358600   | -4.67877100 | 0.66861600  |
| C |   | 1.29520600   | -5.82617400 | -0.12023400 |
| C |   | 1.42858800   | -5.76845300 | -1.50566600 |
| C |   | 1.66524400   | -4.51405100 | -2.08397500 |
| C |   | 1.76408400   | -3.37265500 | -1.30371700 |
| C |   | 1.32548100   | -7.00136300 | -2.35811600 |
| C |   | -1.32553600  | 7.00129600  | 2.35814200  |
| C |   | -11.08496700 | 1.45861500  | -0.81056600 |
| N |   | -12.22713300 | 1.65964300  | -0.90625400 |
| C |   | -8.96586400  | 2.42160900  | -1.20079500 |
| N |   | -8.43642500  | 3.37642400  | -1.60458600 |
| C |   | 11.08508100  | -1.45838000 | 0.81053500  |
| N |   | 12.22727400  | -1.65927200 | 0.90618000  |
| C |   | 8.96607500   | -2.42154500 | 1.20086200  |
| N |   | 8.43676900   | -3.37642600 | 1.60467300  |
| H |   | 1.14768200   | 2.10536200  | -0.76675300 |
| H |   | -1.14766900  | -2.10542500 | 0.76676100  |
| H |   | -1.68933300  | 1.41729800  | -2.94845800 |
| H |   | -2.37567300  | 3.04338400  | -2.79525300 |
| H |   | -0.62129700  | 2.80031200  | -2.66264600 |
| H |   | 1.68934000   | -1.41735200 | 2.94846600  |
| H |   | 0.62131000   | -2.80037200 | 2.66265700  |
| H |   | 2.37568700   | -3.04343500 | 2.79526900  |
| H |   | -4.83410500  | 2.59893200  | -1.10343300 |
| H |   | 4.83411900   | -2.59899400 | 1.10344900  |
| H |   | -6.89487500  | 1.67239700  | -0.79188400 |

|   |              |             |             |
|---|--------------|-------------|-------------|
| H | 6.89490300   | -1.67243600 | 0.79190200  |
| H | -11.93731800 | -0.61209400 | 0.06067000  |
| H | -12.63012600 | -2.78792700 | 0.94303800  |
| H | -10.97655300 | -4.48220400 | 1.63901200  |
| H | -8.52173500  | -3.98415100 | 1.44773300  |
| H | 11.93726900  | 0.61227300  | -0.06073300 |
| H | 12.62996500  | 2.78812700  | -0.94314800 |
| H | 10.97630300  | 4.48231800  | -1.63912000 |
| H | 8.52151100   | 3.98415800  | -1.44778900 |
| H | -1.28395900  | 4.77556900  | -1.74365200 |
| H | -1.11120600  | 6.78442700  | -0.35943400 |
| H | -1.77385000  | 4.43428400  | 3.16318300  |
| H | -1.94873700  | 2.41363700  | 1.78225700  |
| H | 1.28400300   | -4.77563200 | 1.74367700  |
| H | 1.11126500   | -6.78449800 | 0.35946900  |
| H | 1.77387900   | -4.43436600 | -3.16316100 |
| H | 1.94875000   | -2.41371100 | -1.78224500 |
| H | 1.13157000   | -7.89004200 | -1.75239700 |
| H | 0.51693100   | -6.91005700 | -3.09144700 |
| H | 2.24980400   | -7.17226000 | -2.92056000 |
| H | -1.13070800  | 7.88984000  | 1.75251800  |
| H | -2.25024300  | 7.17269100  | 2.91981000  |
| H | -0.51764100  | 6.90964300  | 3.09214700  |

## IDT-20

|     |              |             |             |
|-----|--------------|-------------|-------------|
| 0 1 |              |             |             |
| C   | -0.69958400  | 1.20821200  | 0.00042100  |
| C   | -1.37430900  | -0.04042300 | 0.00053300  |
| C   | -0.68210400  | -1.25727100 | 0.00067000  |
| C   | 0.69957400   | -1.20817500 | 0.00067600  |
| C   | 1.37429900   | 0.04046100  | 0.00056400  |
| C   | 0.68209400   | 1.25730800  | 0.00044500  |
| C   | 1.68055200   | -2.37636400 | 0.00075500  |
| C   | 2.99459800   | -1.62930600 | 0.00064000  |
| C   | 2.78449900   | -0.25474500 | 0.00054800  |
| C   | -1.68056200  | 2.37640200  | 0.00024600  |
| C   | -2.99460800  | 1.62934400  | 0.00024700  |
| C   | -2.78450900  | 0.25478300  | 0.00042800  |
| C   | 1.52208200   | -3.23891600 | 1.26170800  |
| C   | 1.52199500   | -3.23915200 | -1.26002600 |
| C   | -1.52197500  | 3.23893900  | -1.26070200 |
| C   | -1.52212200  | 3.23920400  | 1.26103200  |
| C   | 4.34550200   | -1.95074200 | 0.00055700  |
| C   | 5.18289400   | -0.82066400 | 0.00040600  |
| S   | 4.22811000   | 0.66259000  | 0.00040400  |
| C   | -4.34551100  | 1.95078100  | 0.00008700  |
| C   | -5.18290200  | 0.82070300  | 0.00014900  |
| S   | -4.22812000  | -0.66255200 | 0.00043500  |
| C   | 6.58805600   | -0.98000000 | 0.00014000  |
| C   | -6.58806400  | 0.98003100  | -0.00007900 |
| C   | 7.65226700   | -0.10640000 | -0.00006100 |
| C   | -7.65226000  | 0.10641300  | -0.00009700 |
| C   | 9.06679400   | -0.46105000 | -0.00046300 |
| C   | 9.83968500   | 0.80194900  | -0.00011000 |
| C   | 8.94228400   | 1.88006400  | 0.00029700  |
| C   | 7.55981500   | 1.36577800  | 0.00029100  |
| C   | -9.06679700  | 0.46103000  | -0.00043900 |
| C   | -9.83965400  | -0.80199000 | -0.00020600 |
| C   | -8.94222600  | -1.88008300 | 0.00020700  |
| C   | -7.55977100  | -1.36576100 | 0.00027200  |
| C   | 11.21118500  | 1.06082300  | -0.00015400 |
| C   | 11.63715200  | 2.38920500  | 0.00020800  |
| C   | 10.72988700  | 3.45095500  | 0.00059800  |
| C   | 9.35961700   | 3.19998800  | 0.00064500  |
| C   | -11.21114800 | -1.06089700 | -0.00033900 |
| C   | -11.63708200 | -2.38929000 | -0.00005000 |
| C   | -10.72979100 | -3.45101800 | 0.00036000  |
| C   | -9.35952700  | -3.20001600 | 0.00049200  |
| O   | 6.54408100   | 2.04587800  | 0.00057600  |
| O   | -6.54401700  | -2.04583400 | 0.00059200  |
| C   | -9.63217300  | 1.72153000  | -0.00093600 |
| C   | 9.63213000   | -1.72156800 | -0.00119500 |
| C   | 11.03706400  | -1.95543600 | -0.00151000 |
| N   | 12.17294200  | -2.20835300 | -0.00178900 |
| C   | 8.89152800   | -2.93798300 | -0.00181200 |
| N   | 8.33485400   | -3.96036800 | -0.00235700 |
| C   | -11.03711600 | 1.95534700  | -0.00123100 |
| N   | -12.17300500 | 2.20821500  | -0.00148800 |
| C   | -8.89161600  | 2.93797200  | -0.00124700 |

|   |              |             |             |
|---|--------------|-------------|-------------|
| N | -8.33499200  | 3.96038400  | -0.00152300 |
| H | -1.21595600  | -2.20381000 | 0.00074500  |
| H | 1.21594600   | 2.20384700  | 0.00035000  |
| H | 2.27873200   | -4.02928500 | 1.27762300  |
| H | 0.53637900   | -3.71393800 | 1.27797400  |
| H | 1.63098400   | -2.63742600 | 2.16821300  |
| H | 1.63083600   | -2.63783300 | -2.16665200 |
| H | 2.27864200   | -4.02952500 | -1.27584600 |
| H | 0.53629000   | -3.71417500 | -1.27613600 |
| H | -2.27862000  | 4.02931100  | -1.27669500 |
| H | -0.53626800  | 3.71395700  | -1.27688400 |
| H | -1.63079600  | 2.63744000  | -2.16721000 |
| H | -0.53642000  | 3.71423100  | 1.27722500  |
| H | -2.27877300  | 4.02957500  | 1.27677400  |
| H | -1.63104200  | 2.63789500  | 2.16765500  |
| H | 4.75523000   | -2.95558700 | 0.00056500  |
| H | -4.75524000  | 2.95562600  | -0.00009200 |
| H | 6.84317500   | -2.03527300 | 0.00008700  |
| H | -6.84319400  | 2.03530100  | -0.00029100 |
| H | 11.94857100  | 0.26914600  | -0.00044600 |
| H | 12.70244100  | 2.59812500  | 0.00018500  |
| H | 11.09730200  | 4.47236200  | 0.00086600  |
| H | 8.62897200   | 4.00274100  | 0.00094600  |
| H | -11.94855300 | -0.26923900 | -0.00065300 |
| H | -12.70236600 | -2.59823600 | -0.00014800 |
| H | -11.09718000 | -4.47243300 | 0.00057400  |
| H | -8.62886200  | -4.00275200 | 0.00080700  |

## CO5IC

|     |             |             |             |
|-----|-------------|-------------|-------------|
| 0 1 |             |             |             |
| C   | -1.35840000 | 0.32389100  | 0.02094700  |
| C   | 0.95106200  | 1.01834700  | 0.05522700  |
| C   | -0.39136700 | 1.35369500  | 0.08035900  |
| C   | 0.39156000  | -1.35077600 | -0.09164400 |
| C   | 1.35862800  | -0.32096100 | -0.03243900 |
| C   | -0.86461600 | 2.80782700  | 0.06272500  |
| O   | -2.07749600 | 2.92938300  | 0.85733100  |
| C   | -3.03114000 | 2.01776500  | 0.57671000  |
| C   | -2.73099500 | 0.73615300  | 0.13273200  |
| C   | -4.39597300 | 2.22356000  | 0.76974600  |
| C   | -5.16447400 | 1.09786300  | 0.45675200  |
| S   | -4.14475000 | -0.22050900 | -0.08789200 |
| C   | -1.19113600 | 3.27149300  | -1.35864600 |
| C   | 0.13454600  | 3.72547500  | 0.75636300  |
| C   | -1.98169700 | 4.41493200  | -1.52312700 |
| C   | -2.28335200 | 4.89070500  | -2.79059000 |
| C   | -1.80210200 | 4.24919600  | -3.93933700 |
| C   | -1.00759900 | 3.11648200  | -3.76703100 |
| C   | -0.70716500 | 2.62901600  | -2.49557400 |
| C   | 1.03411600  | 4.51048200  | 0.03686900  |
| C   | 1.97243800  | 5.29837800  | 0.70016100  |
| C   | 2.03316400  | 5.33380500  | 2.09378500  |
| C   | 1.12764700  | 4.54013400  | 2.80759500  |
| C   | 0.19748100  | 3.74395900  | 2.15328800  |
| C   | 3.02117000  | 6.21045400  | 2.80943000  |
| C   | -2.14835200 | 4.76270000  | -5.30798000 |
| C   | 0.86409500  | -2.80511100 | -0.07159500 |
| O   | 2.07890500  | -2.92822800 | -0.86291200 |
| C   | 3.03217500  | -2.01654800 | -0.58109900 |
| C   | 2.73134600  | -0.73362400 | -0.14138000 |
| C   | 4.39761900  | -2.22440800 | -0.76712900 |
| C   | 5.16580900  | -1.09824600 | -0.45498700 |
| S   | 4.14492300  | 0.22335300  | 0.07942300  |
| C   | -0.13380200 | -3.72281700 | -0.76700400 |
| C   | 1.18683600  | -3.26756900 | 1.35106400  |
| C   | 1.97661800  | -4.41100600 | 1.51849900  |
| C   | 2.27471400  | -4.88601000 | 2.78719200  |
| C   | 1.79074900  | -4.24350200 | 3.93410100  |
| C   | 0.99672100  | -3.11078100 | 3.75883200  |
| C   | 0.69990900  | -2.62414600 | 2.48631300  |
| C   | -1.03446100 | -4.50815900 | -0.04929400 |
| C   | -1.97126900 | -5.29633000 | -0.71445600 |
| C   | -2.02934300 | -5.33165400 | -2.10816800 |
| C   | -1.12272700 | -4.53760700 | -2.82021500 |
| C   | -0.19409900 | -3.74119700 | -2.16407100 |
| C   | -3.01574300 | -6.20842300 | -2.82587300 |
| C   | 2.13499000  | -4.75416400 | 5.30429600  |
| C   | 6.57828100  | -1.15254000 | -0.57113700 |

|   |              |             |             |
|---|--------------|-------------|-------------|
| C | -6.57588800  | 1.14731900  | 0.58747500  |
| C | 7.58903300   | -0.25211200 | -0.33560500 |
| C | -7.58679000  | 0.24789500  | 0.34858900  |
| C | -9.01640800  | 0.47089000  | 0.54674000  |
| C | -9.71864200  | -0.75962000 | 0.11959200  |
| C | -8.76718000  | -1.70067400 | -0.30199400 |
| C | -7.41703300  | -1.12240100 | -0.17353400 |
| C | -11.07233300 | -1.09727500 | 0.07744400  |
| C | -11.42723700 | -2.36474600 | -0.38397000 |
| C | -10.46688200 | -3.29069400 | -0.79803400 |
| C | -9.11428500  | -2.96070500 | -0.75919000 |
| C | 9.02008600   | -0.48240900 | -0.51408700 |
| C | 9.71770900   | 0.77080200  | -0.15004900 |
| C | 8.76377800   | 1.72405300  | 0.23717100  |
| C | 7.41584700   | 1.13471600  | 0.13958400  |
| C | 11.06948000  | 1.11816900  | -0.13455000 |
| C | 11.42022200  | 2.40680900  | 0.26758300  |
| C | 10.45758800  | 3.34388900  | 0.65014500  |
| C | 9.10680600   | 3.00454000  | 0.63703200  |
| O | 6.36496500   | 1.70030200  | 0.40213500  |
| C | 9.65200600   | -1.63460300 | -0.93632000 |
| O | -6.36731100  | -1.68284200 | -0.45124300 |
| C | -9.64259500  | 1.59498500  | 1.04607500  |
| C | -0.95086000  | -1.01537500 | -0.06706500 |
| C | 11.06478400  | -1.75184400 | -1.07702100 |
| N | 12.21014400  | -1.90682600 | -1.21097300 |
| C | 8.98153000   | -2.84326800 | -1.28065100 |
| N | 8.48422000   | -3.85419600 | -1.57292700 |
| C | -11.05433600 | 1.70696400  | 1.20060900  |
| N | -12.19865500 | 1.85625600  | 1.34912100  |
| C | -8.96573300  | 2.77312700  | 1.47355900  |
| N | -8.46285200  | 3.75789900  | 1.83693300  |
| H | 1.69887300   | 1.80568900  | 0.07950300  |
| H | -4.82900400  | 3.15106600  | 1.12605000  |
| H | -2.36330100  | 4.92838100  | -0.64573100 |
| H | -2.90242300  | 5.77873400  | -2.89424600 |
| H | -0.61797300  | 2.59861800  | -4.63988900 |
| H | -0.08987100  | 1.74116900  | -2.40078500 |
| H | 1.00553600   | 4.51011500  | -1.04835000 |
| H | 2.66692800   | 5.89992500  | 0.11905300  |
| H | 1.15583600   | 4.54368600  | 3.89461100  |
| H | -0.49336000  | 3.13505600  | 2.72757400  |
| H | 3.86030100   | 6.47764100  | 2.16193400  |
| H | 2.54937700   | 7.14342100  | 3.13954400  |
| H | 3.41904100   | 5.71691800  | 3.70091400  |
| H | -1.98434100  | 5.84248300  | -5.38064700 |
| H | -1.55042200  | 4.27416500  | -6.08131900 |
| H | -3.20427800  | 4.58213800  | -5.53938900 |
| H | 4.83144400   | -3.15428300 | -1.11624700 |
| H | 2.36019300   | -4.92541500 | 0.64253000  |
| H | 2.89293900   | -5.77434100 | 2.89314500  |
| H | 0.60446100   | -2.59246300 | 4.63025200  |
| H | 0.08281600   | -1.73640400 | 2.38925000  |
| H | -1.00792200  | -4.50794300 | 1.03597200  |
| H | -2.66663600  | -5.89818900 | -0.13472400 |
| H | -1.14884600  | -4.54109500 | -3.90728600 |
| H | 0.49766400   | -3.13203200 | -2.73697900 |
| H | -3.85376300  | -6.47967900 | -2.17864500 |
| H | -3.41546000  | -5.71297800 | -3.71549100 |
| H | -2.54193100  | -7.13914800 | -3.15938300 |
| H | 2.00995200   | -5.83960200 | 5.36728100  |
| H | 3.17998500   | -4.53613300 | 5.55296500  |
| H | 1.50856000   | -4.29293300 | 6.07188400  |
| H | 6.88580100   | -2.13017900 | -0.92888000 |
| H | -6.88225200  | 2.11992500  | 0.95972000  |
| H | -11.84904200 | -0.41103500 | 0.38784600  |
| H | -12.47819300 | -2.63415700 | -0.42047800 |
| H | -10.77960700 | -4.26839700 | -1.15096300 |
| H | -8.34421200  | -3.65764200 | -1.07452000 |
| H | 11.84776000  | 0.42424600  | -0.42307600 |
| H | 12.46964300  | 2.68418600  | 0.28197900  |
| H | 10.76706500  | 4.33785200  | 0.95758500  |
| H | 8.33493400   | 3.71000500  | 0.92805300  |
| H | -1.69868700  | -1.80271000 | -0.09109600 |

## IDT-BOC6

|     |            |            |             |
|-----|------------|------------|-------------|
| 0 1 |            |            |             |
| C   | 1.31905400 | 0.40432100 | -0.01575300 |

|   |              |             |             |
|---|--------------|-------------|-------------|
| C | 0.99366000   | -0.97305400 | -0.00191800 |
| C | -0.32739900  | -1.38512800 | -0.00803700 |
| C | -1.31851200  | -0.39878600 | -0.02117500 |
| C | -0.99291500  | 0.97842400  | -0.03583900 |
| C | 0.32802300   | 1.39070000  | -0.02826400 |
| C | -2.76023100  | -0.48373800 | -0.00810300 |
| C | -3.32835000  | 0.77192500  | 0.00080800  |
| C | -2.25752700  | 1.85113100  | -0.03456100 |
| C | 2.76077000   | 0.48956700  | -0.01580100 |
| C | 3.32919800   | -0.76580000 | -0.02068000 |
| C | 2.25884500   | -1.84543500 | -0.00514200 |
| S | -3.93107900  | -1.73326700 | -0.04745800 |
| C | -5.23806400  | -0.55555100 | -0.01485100 |
| C | -4.73059000  | 0.73721200  | -0.00683000 |
| S | 3.93140400   | 1.73957100  | -0.04479400 |
| C | 5.23853800   | 0.56192900  | -0.02832300 |
| C | 4.73143500   | -0.73095400 | -0.02313800 |
| C | -1.50639700  | 4.74295200  | 2.36194300  |
| C | -1.59670800  | 3.97364000  | 1.20763300  |
| C | -2.24158400  | 2.73219700  | 1.21924500  |
| C | -2.78642600  | 2.28919500  | 2.42577600  |
| C | -2.69529800  | 3.06392000  | 3.57875300  |
| C | -2.05742700  | 4.30597800  | 3.57024700  |
| C | -1.97585000  | 3.08816500  | -3.66388700 |
| C | -1.72655200  | 2.38392800  | -2.48782900 |
| C | -2.43763600  | 2.66575300  | -1.32142500 |
| C | -3.41200500  | 3.66993300  | -1.37376100 |
| C | -3.65813400  | 4.36805100  | -2.54881800 |
| C | -2.94139800  | 4.09363400  | -3.71865300 |
| C | 2.82883400   | -2.26457900 | -2.46137900 |
| C | 2.74626500   | -3.02596600 | -3.62399400 |
| C | 2.08530200   | -4.25557800 | -3.64135100 |
| C | 1.50226600   | -4.69479000 | -2.44884800 |
| C | 1.58417300   | -3.93936200 | -1.28503000 |
| C | 2.25169300   | -2.70976100 | -1.27093600 |
| C | 3.39109900   | -3.69696500 | 1.30863100  |
| C | 3.62997000   | -4.41237900 | 2.47517700  |
| C | 2.92030900   | -4.14153900 | 3.64996100  |
| C | 1.96996200   | -3.12060200 | 3.60996600  |
| C | 1.72786700   | -2.39955800 | 2.44283300  |
| C | 2.43119600   | -2.67862300 | 1.27076100  |
| C | 2.02592900   | -5.09241300 | -4.88806000 |
| C | 3.15799600   | -4.94067200 | 4.90016200  |
| C | -1.98822500  | 5.15706200  | 4.80680900  |
| C | -3.19113500  | 4.87197000  | -4.97948500 |
| C | 6.64582400   | 0.92503400  | 0.01955700  |
| C | -6.64487500  | -0.91869000 | 0.04293400  |
| C | 7.12104000   | 2.22780100  | -0.28906200 |
| C | 8.47386300   | 2.49932100  | -0.25000200 |
| C | 9.43467200   | 1.50932700  | 0.05132200  |
| C | 8.95644400   | 0.22287500  | 0.40822800  |
| C | 7.59237700   | -0.04090300 | 0.38994200  |
| C | -7.12162000  | -2.22284200 | -0.25742000 |
| C | -8.47344500  | -2.49660600 | -0.20208500 |
| C | -9.43271700  | -1.50748900 | 0.10705700  |
| C | -8.95283200  | -0.21834500 | 0.45182100  |
| C | -7.58947600  | 0.04740100  | 0.41823900  |
| O | 6.17671500   | 3.14284900  | -0.60425800 |
| O | 9.87905300   | -0.66696000 | 0.81052300  |
| O | -9.87246800  | 0.67201000  | 0.86002700  |
| O | -6.17930000  | -3.13730300 | -0.57958200 |
| C | 6.58411800   | 4.46288700  | -0.90902700 |
| C | 9.45629500   | -1.96087200 | 1.20666000  |
| C | -6.58815500  | -4.45690800 | -0.88432500 |
| C | -9.44835800  | 1.97026500  | 1.23966600  |
| C | 10.80425800  | 1.92796600  | 0.09076200  |
| C | -10.80051600 | -1.92944800 | 0.16821500  |
| C | 12.03059200  | 1.31884800  | 0.08053200  |
| C | -12.02861100 | -1.32379800 | 0.17623500  |
| C | 13.18435600  | 2.15315500  | 0.54760500  |
| C | 14.31094200  | 1.22076300  | 0.75498200  |
| C | 13.92924900  | -0.06353600 | 0.33460200  |
| C | 12.56286300  | 0.00558900  | -0.22966500 |
| C | -13.17175600 | -2.15952200 | 0.66633900  |
| C | -14.29708600 | -1.22938000 | 0.89012700  |
| C | -13.92643600 | 0.05429800  | 0.45815700  |
| C | -12.57013400 | -0.01336100 | -0.13009800 |
| C | 15.56186100  | 1.48482200  | 1.28851500  |
| C | 16.45421600  | 0.42324200  | 1.42031600  |
| C | 16.08069000  | -0.86252000 | 1.02190800  |
| C | 14.82538300  | -1.12291600 | 0.47151000  |

|   |              |             |             |
|---|--------------|-------------|-------------|
| C | -15.53742000 | -1.49454800 | 1.44730600  |
| C | -16.42991800 | -0.43467800 | 1.59147200  |
| C | -16.06695000 | 0.85054900  | 1.18171600  |
| C | -14.82254100 | 1.11198600  | 0.60757300  |
| O | 13.17762000  | 3.35305600  | 0.75507400  |
| C | 12.01444800  | -0.92757900 | -1.08169600 |
| O | -13.15799800 | -3.35857200 | 0.87844700  |
| C | -12.03991600 | 0.91723200  | -0.99624200 |
| C | 10.83687400  | -0.67975400 | -1.84016200 |
| N | 9.90488200   | -0.49473900 | -2.51147000 |
| C | 12.63136800  | -2.17719400 | -1.37431700 |
| N | 13.09533300  | -3.21386800 | -1.62781300 |
| C | -10.87409000 | 0.66945900  | -1.77269100 |
| N | -9.95247100  | 0.48368800  | -2.45793900 |
| C | -12.66674300 | 2.16285900  | -1.28486600 |
| N | -13.13935800 | 3.19625000  | -1.53576800 |
| H | -0.58836500  | -2.43941000 | -0.00446800 |
| H | 0.58856600   | 2.44515300  | -0.03063600 |
| H | -5.36019100  | 1.61840900  | -0.03159000 |
| H | 5.36096300   | -1.61232300 | -0.04363900 |
| H | -0.99881700  | 5.70404600  | 2.32247900  |
| H | -1.16908500  | 4.34916900  | 0.28223500  |
| H | -3.28621700  | 1.32585500  | 2.46850800  |
| H | -3.12986300  | 2.69299000  | 4.50415200  |
| H | -1.40532700  | 2.84623400  | -4.55751500 |
| H | -0.97033500  | 1.60531800  | -2.48587300 |
| H | -3.97937200  | 3.91426600  | -0.47972700 |
| H | -4.42236600  | 5.14184200  | -2.55886800 |
| H | 3.34898900   | -1.31158000 | -2.48491500 |
| H | 3.20747200   | -2.65423100 | -4.53595400 |
| H | 0.97644400   | -5.64665700 | -2.42968300 |
| H | 1.13190400   | -4.31716000 | -0.37224100 |
| H | 3.95165900   | -3.93896000 | 0.40973700  |
| H | 4.38134000   | -5.19883100 | 2.47355900  |
| H | 1.40524500   | -2.88107900 | 4.50798500  |
| H | 0.98312700   | -1.60989600 | 2.45139000  |
| H | 2.14155500   | -4.47951100 | -5.78601700 |
| H | 2.82659200   | -5.84156300 | -4.89791700 |
| H | 1.07733200   | -5.63215000 | -4.96195100 |
| H | 4.21709000   | -5.18670100 | 5.02159700  |
| H | 2.82934700   | -4.39713600 | 5.78997700  |
| H | 2.60751600   | -5.88857900 | 4.87267400  |
| H | -2.08959700  | 4.55377800  | 5.71298000  |
| H | -1.04176000  | 5.70265800  | 4.86339200  |
| H | -2.79229900  | 5.90254100  | 4.81771500  |
| H | -4.25891400  | 5.05924300  | -5.12749900 |
| H | -2.69370500  | 5.84852000  | -4.94545700 |
| H | -2.81307800  | 4.34134100  | -5.85725400 |
| H | 8.83326800   | 3.49436300  | -0.48578300 |
| H | 7.24036500   | -1.01579500 | 0.69813500  |
| H | -8.83353800  | -3.49327700 | -0.42985000 |
| H | -7.23620000  | 1.02455400  | 0.71771100  |
| H | 5.67016200   | 5.01523700  | -1.12592400 |
| H | 7.09756300   | 4.92775400  | -0.05947300 |
| H | 7.23820700   | 4.48218600  | -1.78824100 |
| H | 10.36539700  | -2.50240800 | 1.46682700  |
| H | 8.79827400   | -1.91115700 | 2.08102000  |
| H | 8.94549400   | -2.47919000 | 0.38787000  |
| H | -5.67577100  | -5.00730200 | -1.11243300 |
| H | -7.09228500  | -4.92522600 | -0.03105200 |
| H | -7.25115700  | -4.47391300 | -1.75681000 |
| H | -10.35574500 | 2.51235000  | 1.50464100  |
| H | -8.78107300  | 1.93011300  | 2.10751600  |
| H | -8.94740000  | 2.48201800  | 0.41075900  |
| H | 10.91596800  | 3.00693400  | 0.22321200  |
| H | -10.90725200 | -3.00826700 | 0.30592400  |
| H | 15.82297800  | 2.49363000  | 1.59273700  |
| H | 17.44216600  | 0.59070500  | 1.83775900  |
| H | 16.78225200  | -1.68238400 | 1.14188100  |
| H | 14.56947000  | -2.13300300 | 0.17699500  |
| H | -15.79038900 | -2.50283900 | 1.76001100  |
| H | -17.40968400 | -0.60304600 | 2.02743800  |
| H | -16.76826700 | 1.66912200  | 1.31152600  |
| H | -14.57448200 | 2.12156100  | 0.30469500  |

## ATT-1

|     |            |             |            |
|-----|------------|-------------|------------|
| 0 1 |            |             |            |
| C   | 1.29595600 | -0.46342200 | 0.27274300 |



|   |              |             |             |
|---|--------------|-------------|-------------|
| C | 1.03799300   | 0.92916700  | 0.28216500  |
| C | -0.26075800  | 1.40393500  | 0.26982100  |
| C | -1.29591100  | 0.46343500  | 0.27270000  |
| C | -1.03794900  | -0.92915700 | 0.28177300  |
| C | 0.26080400   | -1.40392200 | 0.26946400  |
| C | -2.72890700  | 0.61337400  | 0.25067100  |
| C | -3.36054200  | -0.61440800 | 0.23090100  |
| C | -2.34102900  | -1.74172400 | 0.27164400  |
| C | 2.72895500   | -0.61335800 | 0.25086400  |
| C | 3.36059300   | 0.61442800  | 0.23151800  |
| C | 2.34108000   | 1.74173500  | 0.27244300  |
| C | -2.35985300  | -2.62405500 | -0.98127300 |
| C | -2.56755700  | -2.54404800 | 1.55982100  |
| C | 2.36008700   | 2.62441400  | -0.98022700 |
| C | 2.56740900   | 2.54370000  | 1.56088100  |
| C | 1.78945800   | 3.90058500  | -0.95665500 |
| C | 1.72552900   | 4.67518500  | -2.10996400 |
| C | 2.23042500   | 4.20821500  | -3.32646600 |
| C | 2.79435900   | 2.93022900  | -3.34591900 |
| C | 2.85817700   | 2.15020600  | -2.19560400 |
| C | 1.83777600   | 2.30808800  | 2.72598000  |
| C | 2.12578100   | 3.00009600  | 3.90067500  |
| C | 3.14930200   | 3.94655800  | 3.95437100  |
| C | 3.88429800   | 4.17381000  | 2.78549400  |
| C | 3.60046700   | 3.48765500  | 1.61204700  |
| C | -1.78926500  | -3.90024200 | -0.95795500 |
| C | -1.72516500  | -4.67452900 | -2.11147200 |
| C | -2.22984100  | -4.20721400 | -3.32792400 |
| C | -2.79373800  | -2.92920000 | -3.34712200 |
| C | -2.85772600  | -2.14949500 | -2.19660900 |
| C | -1.83807800  | -2.30885700 | 2.72507000  |
| C | -2.12633000  | -3.00120200 | 3.89953900  |
| C | -3.14994700  | -3.94754400 | 3.95281700  |
| C | -3.88475800  | -4.17444500 | 2.78372300  |
| C | -3.60069600  | -3.48797800 | 1.61054700  |
| C | -2.19391600  | -5.05995900 | -4.56449300 |
| C | -3.44188200  | -4.71552200 | 5.21073700  |
| C | 3.44059600   | 4.71441800  | 5.21251100  |
| S | 3.83875200   | -1.91906500 | 0.24832100  |
| C | 5.19530800   | -0.80384500 | 0.22995200  |
| C | 4.75822900   | 0.51575900  | 0.22413700  |
| S | -3.83870600  | 1.91907700  | 0.24837300  |
| C | -5.19526200  | 0.80386600  | 0.22953800  |
| C | -4.75817400  | -0.51573700 | 0.22339100  |
| C | 2.19466400   | 5.06134200  | -4.56277600 |
| C | -6.54775400  | 1.27167300  | 0.20023700  |
| C | 6.54780200   | -1.27165100 | 0.20058600  |
| C | -7.06130900  | 2.55188700  | 0.45376700  |
| C | -8.47359500  | 2.58992700  | 0.32463400  |
| C | -9.07864900  | 1.37838600  | -0.01941200 |
| S | -7.82146200  | 0.16881500  | -0.20066900 |
| C | 7.06137500   | -2.55184800 | 0.45414200  |
| C | 8.47365000   | -2.58989400 | 0.32490200  |
| C | 9.07867500   | -1.37837000 | -0.01925300 |
| S | 7.82147000   | -0.16881300 | -0.20048900 |
| C | -6.52218800  | 3.81947200  | 0.83506800  |
| C | -7.49642200  | 4.76076300  | 0.97133900  |
| S | -9.11619400  | 4.16639700  | 0.65387300  |
| C | 6.52227800   | -3.81940800 | 0.83555700  |
| C | 7.49652000   | -4.76069400 | 0.97179900  |
| S | 9.11626900   | -4.16635000 | 0.65417500  |
| C | -10.47689500 | 1.23495700  | -0.18343200 |
| C | 10.47690900  | -1.23495200 | -0.18340000 |
| C | -11.28206400 | 0.17820100  | -0.50407700 |
| C | 11.28205500  | -0.17822200 | -0.50418700 |
| C | -10.89895600 | -1.19211000 | -0.78490200 |
| N | -12.03537000 | -1.97942900 | -1.05557000 |
| C | -13.22332100 | -1.32806200 | -1.03012200 |
| S | -13.02828700 | 0.35822000  | -0.62624800 |
| C | 10.89892800  | 1.19206800  | -0.78508900 |
| N | 12.03531900  | 1.97935700  | -1.05594000 |
| C | 13.22327000  | 1.32798800  | -1.03053700 |
| S | 13.02826700  | -0.35825700 | -0.62649300 |
| O | 9.77229800   | 1.66078300  | -0.79667200 |
| O | -9.77232500  | -1.66082300 | -0.79655200 |
| C | -14.49778600 | -1.82897800 | -1.27269500 |
| C | 14.49771500  | 1.82888400  | -1.27325100 |
| C | -11.83228400 | -3.39489200 | -1.37783000 |
| C | -11.72144000 | -3.63888900 | -2.87340500 |
| C | 11.83221100  | 3.39478500  | -1.37834000 |
| C | 11.72121900  | 3.63861700  | -2.87393200 |

|   |              |             |             |
|---|--------------|-------------|-------------|
| C | -7.36430800  | 6.17474800  | 1.34670100  |
| O | -8.30894900  | 6.93274200  | 1.43994600  |
| O | -6.09335600  | 6.51650600  | 1.56913300  |
| C | -5.88628400  | 7.88244100  | 1.94206100  |
| C | 7.36443300   | -6.17465900 | 1.34724600  |
| O | 8.30907900   | -6.93265200 | 1.44045500  |
| O | 6.09349800   | -6.51640100 | 1.56980200  |
| C | 5.88645300   | -7.88231500 | 1.94282100  |
| C | -14.81685100 | -3.16273100 | -1.62834700 |
| N | -15.13958500 | -4.24122000 | -1.92769300 |
| C | -15.59597200 | -0.93477000 | -1.17059600 |
| N | -16.48772800 | -0.19096100 | -1.08356700 |
| C | 14.81675500  | 3.16261700  | -1.62900200 |
| N | 15.13944700  | 4.24107900  | -1.92849000 |
| C | 15.59590900  | 0.93468400  | -1.17117200 |
| N | 16.48767500  | 0.19088900  | -1.08413000 |
| H | -0.46955000  | 2.46939800  | 0.25269200  |
| H | 0.46959800   | -2.46938000 | 0.25205300  |
| H | 1.40022700   | 4.30022000  | -0.02448100 |
| H | 1.27635900   | 5.66438900  | -2.06193800 |
| H | 3.19185400   | 2.53556400  | -4.27799200 |
| H | 3.29906200   | 1.15901500  | -2.24913600 |
| H | 1.03503400   | 1.57743900  | 2.72500000  |
| H | 1.53901100   | 2.79658400  | 4.79331500  |
| H | 4.69255800   | 4.90129700  | 2.79469800  |
| H | 4.18385200   | 3.69574000  | 0.71919500  |
| H | -1.40020500  | -4.30014400 | -0.02582400 |
| H | -1.27603600  | -5.66376100 | -2.06364600 |
| H | -3.19106200  | -2.53426300 | -4.27915300 |
| H | -3.29857200  | -1.15827600 | -2.24994000 |
| H | -1.03524700  | -1.57830500 | 2.72442900  |
| H | -1.53964600  | -2.79803900 | 4.79231400  |
| H | -4.69303400  | -4.90192100 | 2.79256600  |
| H | -4.18391500  | -3.69578900 | 0.71752300  |
| H | -1.35475300  | -5.76067800 | -4.54228600 |
| H | -3.11129000  | -5.65303200 | -4.65943400 |
| H | -2.10739900  | -4.44972100 | -5.46784000 |
| H | -3.00190100  | -5.71892000 | 5.17025600  |
| H | -3.03170800  | -4.21220800 | 6.09010100  |
| H | -4.51834800  | -4.84199300 | 5.35983600  |
| H | 3.03584800   | 4.20757300  | 6.09237600  |
| H | 4.51672400   | 4.84690300  | 5.35861400  |
| H | 2.99461000   | 5.71528100  | 5.17475600  |
| H | 5.44008800   | 1.35897000  | 0.23361400  |
| H | -5.44002400  | -1.35896000 | 0.23253800  |
| H | 3.11102400   | 5.65622900  | -4.65615000 |
| H | 2.11060100   | 4.45128200  | -5.46646800 |
| H | 1.35413700   | 5.76046500  | -4.54151500 |
| H | -5.47771600  | 4.04174100  | 1.01105900  |
| H | 5.47781800   | -4.04164900 | 1.01165600  |
| H | -11.00371200 | 2.17384200  | -0.01419800 |
| H | 11.00373800  | -2.17382800 | -0.01415100 |
| H | -10.90237300 | -3.66750500 | -0.87545800 |
| H | -12.64062100 | -3.97052300 | -0.92711200 |
| H | -11.54730500 | -4.70330600 | -3.05183500 |
| H | -12.63557800 | -3.35460500 | -3.40016900 |
| H | -10.88211200 | -3.07846300 | -3.29300500 |
| H | 10.90235000  | 3.66745600  | -0.87590900 |
| H | 12.64059400  | 3.97046400  | -0.92776200 |
| H | 11.54708000  | 4.70301700  | -3.05246300 |
| H | 12.63529800  | 3.35426300  | -3.40076000 |
| H | 10.88184000  | 3.07815700  | -3.29338500 |
| H | -4.81216300  | 7.98785300  | 2.08434100  |
| H | -6.23513400  | 8.55101100  | 1.15212600  |
| H | -6.41918800  | 8.11036800  | 2.86767700  |
| H | 4.81235400   | -7.98769200 | 2.08529200  |
| H | 6.23514400   | -8.55092600 | 1.15285000  |
| H | 6.41951300   | -8.11022300 | 2.86835200  |

## DC-IDT2T

|     |             |             |             |
|-----|-------------|-------------|-------------|
| 0 1 |             |             |             |
| C   | 1.28809700  | 0.48474300  | 0.00952000  |
| C   | 1.05284800  | -0.91126900 | 0.04064300  |
| C   | 0.23798700  | 1.40750600  | -0.02671300 |
| C   | -1.05283500 | 0.91128700  | -0.04030600 |
| C   | -1.28808300 | -0.48472500 | -0.00919700 |
| C   | -0.23797200 | -1.40748900 | 0.02703600  |
| C   | -2.36947600 | 1.70177900  | -0.06445200 |

|   |              |             |             |
|---|--------------|-------------|-------------|
| C | -3.37047400  | 0.55830300  | -0.02570100 |
| C | -2.71890200  | -0.65899700 | -0.01294900 |
| C | -4.76754000  | 0.43530100  | -0.03772700 |
| C | -5.17881800  | -0.89006100 | -0.02759400 |
| S | -3.80522400  | -1.98439400 | -0.01250800 |
| C | 2.36948900   | -1.70176000 | 0.06486500  |
| C | 3.37048800   | -0.55828400 | 0.02613400  |
| C | 2.71891700   | 0.65901500  | 0.01331100  |
| C | 4.76755300   | -0.43528600 | 0.03830100  |
| C | 5.17883500   | 0.89007300  | 0.02818800  |
| S | 3.80524300   | 1.98441300  | 0.01292600  |
| C | 2.42253600   | -2.59978700 | -1.17594600 |
| C | 2.58674800   | -2.48414300 | 1.36664200  |
| C | -2.42246200  | 2.59977000  | 1.17638800  |
| C | -2.58680000  | 2.48419900  | -1.36619500 |
| C | 1.85768600   | -3.87862800 | -1.14856900 |
| C | 1.82310100   | -4.66840800 | -2.29247500 |
| C | 2.35325400   | -4.21494400 | -3.50348100 |
| C | 2.91247100   | -2.93522300 | -3.52678300 |
| C | 2.94671500   | -2.13975100 | -2.38559300 |
| C | 3.62413600   | -3.42111100 | 1.44349200  |
| C | 3.89784000   | -4.08849800 | 2.63031800  |
| C | 3.14806000   | -3.84832500 | 3.78679500  |
| C | 2.12096100   | -2.90730800 | 3.70772800  |
| C | 1.84304800   | -2.23427500 | 2.52003800  |
| C | -1.85767100  | 3.87863400  | 1.14900500  |
| C | -1.82302600  | 4.66838000  | 2.29293800  |
| C | -2.35305800  | 4.21485300  | 3.50396900  |
| C | -2.91221800  | 2.93510500  | 3.52727600  |
| C | -2.94652300  | 2.13967000  | 2.38606500  |
| C | -3.62422400  | 3.42114300  | -1.44297100 |
| C | -3.89799000  | 4.08856500  | -2.62975400 |
| C | -3.14824200  | 3.84845700  | -3.78627500 |
| C | -2.12111100  | 2.90748000  | -3.70727900 |
| C | -1.84313200  | 2.23440500  | -2.51962000 |
| C | 2.34834600   | -5.08458900 | -4.72878300 |
| C | 3.42652600   | -4.59726700 | 5.05921000  |
| C | -2.34808600  | 5.08444800  | 4.72930800  |
| C | -3.42683200  | 4.59741900  | -5.05864900 |
| C | 6.51530700   | 1.40788500  | 0.02785600  |
| C | -6.51528700  | -1.40787700 | -0.02712700 |
| S | -7.88252700  | -0.34218900 | 0.01901600  |
| C | -9.00041200  | -1.68971900 | -0.00716300 |
| C | -8.28731600  | -2.89480000 | -0.04855800 |
| C | -6.90657700  | -2.74535000 | -0.05969700 |
| S | 7.88252200   | 0.34221700  | -0.01946400 |
| C | 9.00043200   | 1.68970600  | 0.00770100  |
| C | 8.28736100   | 2.89476300  | 0.05019900  |
| C | 6.90662100   | 2.74532300  | 0.06146400  |
| C | -10.41322600 | -1.69931300 | 0.01255200  |
| C | 10.41324500  | 1.69928800  | -0.01220900 |
| C | -11.37374000 | -0.71322200 | 0.05112200  |
| C | 11.37373300  | 0.71320600  | -0.05161500 |
| C | -12.81773800 | -0.90638800 | 0.06871300  |
| C | -13.44325600 | 0.43568800  | 0.09187000  |
| C | -12.43039300 | 1.40626400  | 0.09645900  |
| C | -11.11469700 | 0.73840800  | 0.07381600  |
| C | 12.81773300  | 0.90635500  | -0.06921500 |
| C | 13.44322200  | -0.43571600 | -0.09337400 |
| C | 12.43033800  | -1.40626800 | -0.09856500 |
| C | 11.11465900  | -0.73840200 | -0.07535300 |
| C | -14.77689500 | 0.84571100  | 0.10876100  |
| C | -15.05187700 | 2.21330100  | 0.12989900  |
| C | -14.03161300 | 3.16677600  | 0.13494900  |
| C | -12.69795000 | 2.76450500  | 0.11805900  |
| C | 14.77685100  | -0.84575700 | -0.11062500 |
| C | 15.05180300  | -2.21333800 | -0.13270400 |
| C | 14.03151800  | -3.16678800 | -0.13834000 |
| C | 12.69786500  | -2.76450000 | -0.12110200 |
| O | -10.02792800 | 1.29818100  | 0.07310400  |
| O | 10.02787900  | -1.29815500 | -0.07498500 |
| C | 13.52172700  | 2.09535000  | -0.06986300 |
| C | -13.52170700 | -2.09539700 | 0.07014400  |
| C | 14.94382800  | 2.16921300  | -0.08869900 |
| N | 16.10104600  | 2.29146100  | -0.10345400 |
| C | 12.92163400  | 3.38670600  | -0.05552300 |
| N | 12.48111600  | 4.46422200  | -0.04499900 |
| C | -14.94380900 | -2.16927800 | 0.08883300  |
| N | -16.10102600 | -2.29154200 | 0.10351800  |
| C | -12.92158400 | -3.38675000 | 0.05681900  |
| N | -12.48103800 | -4.46426300 | 0.04713900  |

|   |              |             |             |
|---|--------------|-------------|-------------|
| H | 0.42989100   | 2.47620800  | -0.04201800 |
| H | -0.42987800  | -2.47619000 | 0.04235800  |
| H | -5.46412000  | 1.26624000  | -0.05784200 |
| H | 5.46412900   | -1.26622500 | 0.05858600  |
| H | 1.44975800   | -4.26778500 | -0.21995800 |
| H | 1.37722200   | -5.65897300 | -2.24160100 |
| H | 3.33021300   | -2.55136500 | -4.45453900 |
| H | 3.38569500   | -1.14786900 | -2.44170200 |
| H | 4.21966900   | -3.63813900 | 0.56084800  |
| H | 4.71016800   | -4.81089800 | 2.65974500  |
| H | 1.52365900   | -2.69279500 | 4.59076300  |
| H | 1.03814100   | -1.50637800 | 2.49931000  |
| H | -1.44983700  | 4.26784000  | 0.22037300  |
| H | -1.37719500  | 5.65896600  | 2.24205700  |
| H | -3.32986800  | 2.55120000  | 4.45505400  |
| H | -3.38545300  | 1.14776700  | 2.44217500  |
| H | -4.21972600  | 3.63812000  | -0.56029300 |
| H | -4.71033800  | 4.81094500  | -2.65912500 |
| H | -1.52382600  | 2.69302700  | -4.59034000 |
| H | -1.03819500  | 1.50653900  | -2.49895000 |
| H | 1.50134000   | -5.77624000 | -4.72415100 |
| H | 2.29732700   | -4.48642600 | -5.64282200 |
| H | 3.26171100   | -5.68865000 | -4.78561100 |
| H | 4.49925400   | -4.75839200 | 5.20063000  |
| H | 3.04353000   | -4.05987700 | 5.93077600  |
| H | 2.95009900   | -5.58473600 | 5.04671500  |
| H | -1.50133500  | 5.77640800  | 4.72444300  |
| H | -3.26165900  | 5.68816500  | 4.78645200  |
| H | -2.29656300  | 4.48626200  | 5.64330500  |
| H | -4.49965600  | 4.75750900  | -5.20054800 |
| H | -2.95141300  | 5.58536700  | -5.04569200 |
| H | -3.04289400  | 4.06060700  | -5.93015400 |
| H | -8.79503100  | -3.85324500 | -0.07065200 |
| H | -6.20746900  | -3.57312300 | -0.09397100 |
| H | 8.79509400   | 3.85318200  | 0.07304000  |
| H | 6.20752800   | 3.57307200  | 0.09664700  |
| H | -10.77996900 | -2.72094900 | -0.00836600 |
| H | 10.78001100  | 2.72090000  | 0.00941700  |
| H | -15.59796000 | 0.14107900  | 0.10530400  |
| H | -16.08711900 | 2.53993400  | 0.14262300  |
| H | -14.28228200 | 4.22283200  | 0.15181300  |
| H | -11.88227100 | 3.48073000  | 0.12116200  |
| H | 15.59793300  | -0.14114500 | -0.10674000 |
| H | 16.08703700  | -2.53998500 | -0.14570600 |
| H | 14.28216300  | -4.22283800 | -0.15592800 |
| H | 11.88217000  | -3.48070400 | -0.12464000 |

## BZIC

|     |             |             |             |
|-----|-------------|-------------|-------------|
| 0 1 |             |             |             |
| C   | 1.22606400  | 1.27659200  | -0.25496400 |
| C   | 0.85743700  | -0.09873200 | -0.20173100 |
| C   | -0.52077100 | -0.46456000 | -0.22948200 |
| C   | -1.52322300 | 0.54130900  | -0.09777700 |
| C   | -1.14032000 | 1.90975200  | -0.07575100 |
| C   | 0.21473200  | 2.27396600  | -0.20502600 |
| N   | -1.13608700 | -1.69835300 | -0.37124500 |
| C   | -2.49357000 | -1.49539100 | -0.28842600 |
| C   | -2.75404900 | -0.13036900 | -0.10806100 |
| C   | 2.62882400  | 1.30493800  | -0.27486200 |
| C   | 3.08213200  | -0.01965000 | -0.18992700 |
| N   | 2.00563400  | -0.87479800 | -0.13712400 |
| N   | -1.87393300 | 3.02714700  | 0.00681800  |
| N   | -0.96437300 | 3.98378000  | -0.06675800 |
| N   | 0.29706400  | 3.61072500  | -0.19892500 |
| C   | -1.34070700 | 5.37966200  | -0.07679200 |
| C   | -0.57884000 | -2.92833400 | -0.90370900 |
| C   | 2.14184800  | -2.22438900 | 0.38575400  |
| C   | -3.64127700 | -2.28294400 | -0.39994100 |
| C   | -4.79861900 | -1.51618100 | -0.25626400 |
| S   | -4.43720200 | 0.19622800  | -0.03282100 |
| S   | 3.93107800  | 2.41529000  | -0.30533200 |
| C   | 5.09801300  | 1.08948300  | -0.17569900 |
| C   | 4.46958600  | -0.15484200 | -0.12906400 |
| C   | -6.10096100 | -2.04893300 | -0.42409300 |
| C   | 6.46743400  | 1.43280000  | -0.25613500 |
| C   | -7.36106400 | -1.53525100 | -0.26456600 |
| C   | 7.63502200  | 0.71982300  | -0.12527700 |
| C   | -8.46530300 | -2.16405600 | -1.04678000 |

|   |              |             |             |
|---|--------------|-------------|-------------|
| C | -9.56621800  | -1.17501800 | -1.05362900 |
| C | -9.21641900  | -0.08226400 | -0.24112600 |
| C | -7.91528200  | -0.37166800 | 0.39797700  |
| C | -10.76754700 | -1.22718300 | -1.74086900 |
| C | -11.63563100 | -0.14331000 | -1.62455800 |
| C | -11.29045800 | 0.95543200  | -0.83385200 |
| C | -10.08759200 | 0.99963500  | -0.12839800 |
| C | 8.85185400   | 1.33042500  | -0.74095400 |
| C | 9.85249900   | 0.24715300  | -0.83161700 |
| C | 9.33583100   | -0.91066200 | -0.22694800 |
| C | 8.01379400   | -0.59027900 | 0.35906600  |
| C | 11.10340600  | 0.27781100  | -1.42451100 |
| C | 11.85438000  | -0.89606000 | -1.42783400 |
| C | 11.34444400  | -2.05910700 | -0.84663300 |
| C | 10.09010600  | -2.08308300 | -0.23567500 |
| C | -7.46024400  | 0.19306100  | 1.57155600  |
| C | 7.39562000   | -1.32807500 | 1.35089900  |
| O | -8.43820400  | -3.24263400 | -1.61143300 |
| O | 8.97034800   | 2.47700200  | -1.13321600 |
| C | -6.42891700  | -0.40401800 | 2.35089300  |
| N | -5.63457700  | -0.90420500 | 3.03791400  |
| C | -8.08409600  | 1.31604900  | 2.18532900  |
| N | -8.56368800  | 2.24072600  | 2.70354300  |
| C | 6.32223300   | -0.82447800 | 2.13411800  |
| N | 5.45921800   | -0.43848700 | 2.81272200  |
| C | 7.85702200   | -2.60670600 | 1.77610300  |
| N | 8.18854400   | -3.66060200 | 2.14126500  |
| H | -2.25024800  | 5.49237800  | 0.51096800  |
| H | -0.52851500  | 5.95632900  | 0.36300300  |
| H | -1.51883900  | 5.71521900  | -1.10159900 |
| H | -0.34461000  | -3.64907700 | -0.11622100 |
| H | -1.30843800  | -3.37563400 | -1.58162500 |
| H | 0.31837400   | -2.70877900 | -1.48147700 |
| H | 2.99677100   | -2.24799500 | 1.06459400  |
| H | 1.25610600   | -2.48781600 | 0.96233200  |
| H | 2.29883400   | -2.95933200 | -0.40755000 |
| H | -3.67355100  | -3.35324100 | -0.56634700 |
| H | 5.00977000   | -1.09194300 | -0.10752500 |
| H | -6.10936800  | -3.03680900 | -0.88896400 |
| H | 6.66565700   | 2.45584600  | -0.58472600 |
| H | -11.01071400 | -2.09187700 | -2.35031600 |
| H | -12.58391100 | -0.14726000 | -2.15282100 |
| H | -11.97258000 | 1.79711000  | -0.76425300 |
| H | -9.84788200  | 1.86770500  | 0.47322900  |
| H | 11.47266200  | 1.19519600  | -1.87201200 |
| H | 12.83775500  | -0.91177000 | -1.88714400 |
| H | 11.93594100  | -2.96918200 | -0.86812800 |
| H | 9.72596400   | -3.00393900 | 0.20215400  |

## ITOIC

|     |             |             |             |
|-----|-------------|-------------|-------------|
| 0 1 |             |             |             |
| C   | -1.01900500 | -0.94599700 | 0.03285000  |
| C   | -1.30505600 | 0.44072100  | 0.05837200  |
| C   | -0.28747400 | 1.39998400  | 0.08705200  |
| C   | 1.02046100  | 0.95046200  | 0.09744100  |
| C   | 1.30645300  | -0.43618300 | 0.06873700  |
| C   | 0.28893200  | -1.39547100 | 0.04182400  |
| C   | -2.30655800 | -1.78315100 | 0.01924900  |
| C   | 2.30815400  | 1.78742500  | 0.11336600  |
| C   | -2.74181300 | 0.56631600  | 0.05863800  |
| C   | -3.34671100 | -0.67513600 | 0.05452400  |
| C   | -4.74550700 | -0.60209400 | 0.04504000  |
| C   | -5.20610500 | 0.70889400  | 0.04900800  |
| S   | -3.87158300 | 1.85601700  | 0.04852500  |
| C   | 2.74311400  | -0.56181000 | 0.06272900  |
| C   | 3.34820700  | 0.67949800  | 0.07013700  |
| C   | 4.74706000  | 0.60615000  | 0.06813300  |
| C   | 5.20725400  | -0.70491200 | 0.05322300  |
| S   | 3.87245200  | -1.85168600 | 0.04689800  |
| C   | -2.32352800 | -2.67361700 | 1.26647900  |
| C   | -2.50147200 | -2.58228700 | -1.27567300 |
| C   | 2.32398100  | 2.68440500  | -1.12922500 |
| C   | -1.71827500 | -3.93398100 | 1.24585000  |
| C   | -1.65509900 | -4.71467200 | 2.39485600  |
| C   | -2.19523900 | -4.27014600 | 3.60470500  |
| C   | -2.79387600 | -3.00823100 | 3.62171700  |
| C   | -2.85729400 | -2.22224100 | 2.47526600  |
| C   | -3.50867100 | -3.55247000 | -1.34260600 |

|   |              |             |             |
|---|--------------|-------------|-------------|
| C | -3.76537600  | -4.23612000 | -2.52390400 |
| C | -3.02749700  | -3.98024200 | -3.68473200 |
| C | -2.03005800  | -3.00719600 | -3.61541400 |
| C | -1.76967000  | -2.31745500 | -2.43324600 |
| C | 1.72418600   | 3.94715500  | -1.10011900 |
| C | 1.65921200   | 4.73332000  | -2.24533000 |
| C | 2.19206900   | 4.29199000  | -3.45952500 |
| C | 2.78528600   | 3.02762700  | -3.48491600 |
| C | 2.85038100   | 2.23612600  | -2.34244100 |
| C | -2.16026800  | -5.13150000 | 4.83541000  |
| C | -3.28746300  | -4.74553500 | -4.95136700 |
| C | 2.15476400   | 5.15879100  | -4.68630800 |
| C | 3.29615400   | 4.72228900  | 5.09911000  |
| C | 3.51539600   | 3.54571100  | 1.48486500  |
| C | 3.77358600   | 4.22286000  | 2.66951700  |
| C | 3.03403400   | 3.96401000  | 3.82869000  |
| C | 2.03324900   | 2.99488300  | 3.75397700  |
| C | 1.77126400   | 2.31171200  | 2.56824800  |
| C | 2.50488000   | 2.57927300  | 1.41248400  |
| C | -9.07447000  | 1.26805100  | 0.05572100  |
| C | -8.44032000  | 2.52585600  | 0.06962700  |
| C | -7.03654400  | 2.45277300  | 0.07909100  |
| C | -6.56906800  | 1.14243400  | 0.04874800  |
| S | -7.87253600  | -0.00630500 | 0.04447300  |
| C | -10.47665900 | 1.19533500  | -0.01271000 |
| C | -11.37140000 | 0.14542100  | -0.03770400 |
| C | -11.02569100 | -1.27804500 | 0.11044100  |
| C | -12.29932300 | -2.02400500 | 0.15018600  |
| C | -13.36705100 | -1.12422100 | 0.01386600  |
| C | -12.81797800 | 0.24323900  | -0.14113700 |
| O | -9.90766800  | -1.76624200 | 0.20140700  |
| C | -13.58126000 | 1.37070800  | -0.38153200 |
| C | -12.48678700 | -3.38674100 | 0.30366200  |
| C | -13.79448500 | -3.86772600 | 0.32621700  |
| C | -14.86830600 | -2.98498200 | 0.19658600  |
| C | -14.67373800 | -1.61212100 | 0.03802500  |
| C | 9.07485800   | -1.26823800 | 0.00518600  |
| C | 8.43963400   | -2.52506200 | 0.04252700  |
| C | 7.03623900   | -2.45000700 | 0.07103300  |
| C | 6.56983600   | -1.13942900 | 0.03593000  |
| S | 7.87427900   | 0.00753400  | -0.00108200 |
| O | 6.19894400   | -3.51873600 | 0.10923800  |
| C | 10.47559700  | -1.19808900 | -0.08973900 |
| C | 11.37084200  | -0.14969000 | -0.14385300 |
| C | 11.03023700  | 1.27573800  | -0.00270300 |
| C | 12.30575000  | 2.01962400  | 0.00668200  |
| C | 13.36914500  | 1.11663200  | -0.14191600 |
| C | 12.81479500  | -0.25087500 | -0.27566200 |
| O | 9.91488600   | 1.76684800  | 0.10389600  |
| C | 13.57082500  | -1.38122400 | -0.52528500 |
| C | 12.49861300  | 3.38331300  | 0.14434700  |
| C | 13.80738800  | 3.86186600  | 0.13784000  |
| C | 14.87698900  | 2.97587400  | -0.00394900 |
| C | 14.67694000  | 1.60204600  | -0.14655800 |
| O | -9.15632400  | 3.66348600  | 0.11423700  |
| O | -6.19976100  | 3.52239900  | 0.09531400  |
| O | 9.15522500   | -3.66266300 | 0.09043500  |
| C | -8.92280600  | 4.59447900  | -0.95274800 |
| C | -6.24418200  | 4.28564400  | 1.30788500  |
| C | 6.25074500   | -4.26213800 | 1.33404700  |
| C | 8.90299200   | -4.60911200 | -0.95839800 |
| C | -13.04567400 | 2.67129500  | -0.60444100 |
| N | -12.66496700 | 3.75349600  | -0.80277300 |
| C | -15.00264500 | 1.35535400  | -0.46198600 |
| N | -16.16334800 | 1.40111400  | -0.53586800 |
| C | 14.99025600  | -1.36915200 | -0.63514000 |
| N | 16.14908300  | -1.41752300 | -0.73293600 |
| C | 13.02803300  | -2.68158400 | -0.73151200 |
| N | 12.64126300  | -3.76374700 | -0.91796600 |
| H | -0.51739500  | 2.46129100  | 0.09852200  |
| H | 0.51900200   | -2.45672300 | 0.02877900  |
| H | -5.41128200  | -1.45821800 | 0.03393500  |
| H | 5.41323600   | 1.46195200  | 0.07941700  |
| H | -1.30134400  | -4.31632000 | 0.31839500  |
| H | -1.17873400  | -5.69122100 | 2.34887000  |
| H | -3.22023700  | -2.63144200 | 4.54848500  |
| H | -3.32754300  | -1.24450300 | 2.52564200  |
| H | -4.09391900  | -3.78215700 | -0.45627300 |
| H | -4.55483300  | -4.98375800 | -2.54558200 |
| H | -1.44270000  | -2.77999900 | -4.50196000 |
| H | -0.98816500  | -1.56432200 | -2.42015700 |

|   |              |             |             |
|---|--------------|-------------|-------------|
| H | 1.31262700   | 4.32688700  | -0.16920800 |
| H | 1.18677800   | 5.71145000  | -2.19295300 |
| H | 3.20556900   | 2.65301900  | -4.41531900 |
| H | 3.31563100   | 1.25637700  | -2.39972200 |
| H | -3.05604100  | -5.76057800 | 4.90036700  |
| H | -1.29422500  | -5.79920600 | 4.83125300  |
| H | -2.12202400  | -4.52638500 | 5.74551100  |
| H | -4.35627600  | -4.93086100 | -5.09315600 |
| H | -2.91479900  | -4.20706000 | -5.82671900 |
| H | -2.79006900  | -5.72246700 | -4.93019000 |
| H | 3.05158200   | 5.78636700  | -4.75154400 |
| H | 2.11220000   | 4.55765600  | -5.59883200 |
| H | 1.29001100   | 5.82810100  | -4.67635100 |
| H | 4.36619600   | 4.89612700  | 5.24626600  |
| H | 2.80913500   | 5.70444500  | 5.07906200  |
| H | 2.91416600   | 4.18469800  | 5.97097600  |
| H | 4.10199700   | 3.77776200  | 0.60004500  |
| H | 4.56557000   | 4.96768700  | 2.69521400  |
| H | 1.44441300   | 2.76560200  | 4.63904100  |
| H | 0.98691100   | 1.56161800  | 2.55079900  |
| H | -10.89591900 | 2.19769500  | -0.03977000 |
| H | -11.63076300 | -4.04679100 | 0.40343500  |
| H | -15.53408400 | -0.96275700 | -0.05742700 |
| H | 10.89330200  | -2.20122200 | -0.11311000 |
| H | 11.64584300  | 4.04594300  | 0.25438700  |
| H | 15.53415600  | 0.95009800  | -0.25214700 |
| H | -9.56492600  | 5.44921300  | -0.74458200 |
| H | -7.87555500  | 4.90400800  | -0.98518600 |
| H | -9.20778900  | 4.14485100  | -1.90825300 |
| H | -7.24607600  | 4.69030800  | 1.47800300  |
| H | -5.94672100  | 3.66736300  | 2.16058500  |
| H | -5.53283900  | 5.10133700  | 1.17848700  |
| H | 7.25347900   | -4.66520500 | 1.50327700  |
| H | 5.96002300   | -3.62945900 | 2.17835100  |
| H | 5.53757600   | -5.07893600 | 1.22298600  |
| H | 9.54716600   | -5.46169100 | -0.74786200 |
| H | 7.85498000   | -4.91732700 | -0.96922700 |
| H | 9.17328100   | -4.17453600 | -1.92509300 |
| H | 13.99966900  | 4.92490800  | 0.24448300  |
| H | 15.89208000  | 3.36078900  | -0.00374700 |
| H | -15.88244700 | -3.37174300 | 0.21915800  |
| H | -13.98263300 | -4.93010600 | 0.44601200  |

## IDTOT2F

|     |             |             |             |
|-----|-------------|-------------|-------------|
| 0 1 |             |             |             |
| C   | 0.34590700  | -1.34791500 | -0.20664600 |
| C   | 1.33369100  | -0.33509300 | -0.20143700 |
| C   | 0.99818300  | 1.02219400  | -0.19412400 |
| C   | -0.34594200 | 1.34800800  | -0.20669500 |
| C   | -1.33372400 | 0.33518500  | -0.20138900 |
| C   | -0.99821700 | -1.02210100 | -0.19402700 |
| C   | -0.97437600 | 2.74981800  | -0.19768100 |
| C   | -2.45066700 | 2.37854800  | -0.16259600 |
| C   | -2.60777200 | 1.00966600  | -0.19100300 |
| C   | 0.97433900  | -2.74972700 | -0.19761200 |
| C   | 2.45062700  | -2.37845500 | -0.16266700 |
| C   | 2.60774100  | -1.00957600 | -0.19112200 |
| C   | 0.69608800  | -3.53384900 | -1.48844400 |
| C   | 0.49255400  | -3.47149800 | 1.06634500  |
| C   | -0.49248600 | 3.47166400  | 1.06619700  |
| C   | -0.69623000 | 3.53388200  | -1.48856700 |
| C   | 1.00795300  | -4.89735200 | -1.55788600 |
| C   | 0.82310300  | -5.61311100 | -2.73301600 |
| C   | 0.32435800  | -4.99963100 | -3.88753600 |
| C   | 0.02640200  | -3.63905700 | -3.81779700 |
| C   | 0.20762500  | -2.91657100 | -2.64024600 |
| C   | 1.10673800  | -3.23666800 | 2.29958900  |
| C   | 0.61586100  | -3.81585200 | 3.46513300  |
| C   | -0.50998900 | -4.64358700 | 3.44514500  |
| C   | -1.13183900 | -4.86014400 | 2.21323800  |
| C   | -0.64222300 | -4.28633400 | 1.04382500  |
| C   | 0.64223600  | 4.28659800  | 1.04350100  |
| C   | 1.13196400  | 4.86046800  | 2.21281900  |
| C   | 0.51028600  | 4.64389000  | 3.44483000  |
| C   | -0.61549000 | 3.81609000  | 3.46498800  |
| C   | -1.10648700 | 3.23682900  | 2.29951200  |
| C   | -1.00829200 | 4.89735900  | -1.55805800 |
| C   | -0.82352000 | 5.61310600  | -2.73318300 |

|   |              |             |             |
|---|--------------|-------------|-------------|
| C | -0.32467200  | 4.99964800  | -3.88769600 |
| C | -0.02644100  | 3.63916000  | -3.81788200 |
| C | -0.20759900  | 2.91666200  | -2.64030300 |
| C | 0.10219400   | -5.78755600 | -5.14739900 |
| C | -1.02021400  | -5.29406500 | 4.69961100  |
| C | 1.02071700   | 5.29446300  | 4.69916300  |
| C | -0.10309000  | 5.78754700  | -5.14768000 |
| C | -3.68571900  | 3.06155500  | -0.16536000 |
| C | -4.77787300  | 2.18849400  | -0.20654100 |
| S | -4.25020600  | 0.51988300  | -0.22840600 |
| C | 3.68566600   | -3.06148200 | -0.16546900 |
| C | 4.77782800   | -2.18843800 | -0.20671300 |
| S | 4.25017900   | -0.51981400 | -0.22859600 |
| C | -6.16595600  | 2.53449700  | -0.27089300 |
| S | -7.40663100  | 1.36648600  | 0.04435900  |
| C | -8.67376800  | 2.52013600  | -0.28324000 |
| C | -8.11109000  | 3.75284600  | -0.62149700 |
| C | -6.71958100  | 3.77305700  | -0.59920500 |
| C | 6.16590500   | -2.53446300 | -0.27112500 |
| S | 7.40661400   | -1.36650100 | 0.04416900  |
| C | 8.67371500   | -2.52016400 | -0.28353800 |
| C | 8.11099800   | -3.75283600 | -0.62186100 |
| C | 6.71948800   | -3.77301500 | -0.59953000 |
| C | -10.05639100 | 2.24457900  | -0.36459800 |
| C | -10.82904600 | 1.14322600  | -0.08671600 |
| C | 10.05634300  | -2.24463100 | -0.36490900 |
| C | 10.82903200  | -1.14332700 | -0.08693600 |
| C | -12.12419400 | 1.01582500  | -0.81029600 |
| C | -12.51374300 | -0.40765400 | -0.68719500 |
| C | -11.59519100 | -1.07171300 | 0.14077400  |
| C | -10.62974300 | -0.07952400 | 0.65918300  |
| C | 12.12416900  | -1.01588900 | -0.81053200 |
| C | 12.51377600  | 0.40755800  | -0.68727300 |
| C | 11.59526900  | 1.07155500  | 0.14079500  |
| C | 10.62979500  | 0.07934300  | 0.65911400  |
| C | -13.58557800 | -1.05418000 | -1.28170900 |
| C | -13.71628400 | -2.41050100 | -1.04095100 |
| C | -12.79962000 | -3.08638600 | -0.22768700 |
| C | -11.73754000 | -2.43750400 | 0.38156800  |
| C | 13.58562000  | 1.05411100  | -1.28174100 |
| C | 13.71638500  | 2.41039900  | -1.04083000 |
| C | 12.79976700  | 3.08622500  | -0.22746600 |
| C | 11.73767600  | 2.43731400  | 0.38174200  |
| O | 3.81458100   | -4.41157400 | -0.15690100 |
| O | -3.81467600  | 4.41164400  | -0.15679200 |
| C | -4.08724900  | 4.98099700  | 1.12934200  |
| C | 4.08737500   | -4.98092900 | 1.12918400  |
| O | -12.71369000 | 1.88517700  | -1.42550900 |
| C | -9.87768200  | -0.22989000 | 1.80764900  |
| O | 12.71361000  | -1.88519000 | -1.42586900 |
| C | 9.87776600   | 0.22959900  | 1.80761500  |
| F | 14.71191400  | 3.10841000  | -1.57923500 |
| F | 12.97241400  | 4.39260600  | -0.04704400 |
| F | -14.71180000 | -3.10848800 | -1.57941200 |
| F | -12.97221400 | -4.39279400 | -0.04741100 |
| C | -9.31064200  | 0.88110800  | 2.49271500  |
| N | -8.88906700  | 1.77606300  | 3.10492300  |
| C | -9.74602500  | -1.47191700 | 2.48987400  |
| N | -9.61023400  | -2.47943000 | 3.05594500  |
| C | 9.31069700   | -0.88145600 | 2.49256200  |
| N | 8.88910400   | -1.77648400 | 3.10465100  |
| C | 9.74616800   | 1.47154700  | 2.48999600  |
| N | 9.61040800   | 2.47899000  | 3.05619800  |
| H | 1.76306700   | 1.79313200  | -0.17602100 |
| H | -1.76309800  | -1.79304000 | -0.17584900 |
| H | 1.40551900   | -5.40118600 | -0.68335600 |
| H | 1.07369200   | -6.67119200 | -2.75549900 |
| H | -0.35716000  | -3.12943000 | -4.69845700 |
| H | -0.03650500  | -1.85922500 | -2.62835000 |
| H | 1.97447500   | -2.58457000 | 2.35448300  |
| H | 1.11598100   | -3.61556900 | 4.40970400  |
| H | -2.01662300  | -5.49052700 | 2.16462800  |
| H | -1.14749200  | -4.48228100 | 0.10284000  |
| H | 1.14735600   | 4.48255700  | 0.10243800  |
| H | 2.01669700   | 5.49091500  | 2.16407300  |
| H | -1.11547600  | 3.61581300  | 4.40963000  |
| H | -1.97417000  | 2.58467100  | 2.35454600  |
| H | -1.40591800  | 5.40116100  | -0.68353800 |
| H | -1.07422800  | 6.67116000  | -2.75568100 |
| H | 0.35731900   | 3.12959700  | -4.69849000 |
| H | 0.03675400   | 1.85936900  | -2.62836400 |



|   |              |             |             |
|---|--------------|-------------|-------------|
| H | 0.94249600   | -6.45828100 | -5.35153600 |
| H | -0.79570000  | -6.41161800 | -5.06870300 |
| H | -0.02758400  | -5.13078300 | -6.01143800 |
| H | -0.56792000  | -6.28280200 | 4.84181500  |
| H | -0.78169100  | -4.69698000 | 5.58404200  |
| H | -2.10402700  | -5.43528900 | 4.66363900  |
| H | 0.57149900   | 6.28490300  | 4.83924000  |
| H | 0.77890700   | 4.69940900  | 5.58405800  |
| H | 2.10504900   | 5.43211000  | 4.66463800  |
| H | -0.94652300  | 6.45340200  | -5.35495100 |
| H | 0.79103700   | 6.41671200  | -5.06697700 |
| H | 0.03275300   | 5.13064300  | -6.01067800 |
| H | -8.72646000  | 4.60535000  | -0.88811400 |
| H | -6.10829900  | 4.62907900  | -0.85114300 |
| H | 8.72633800   | -4.60533700 | -0.88855500 |
| H | 6.10817600   | -4.62900800 | -0.85149400 |
| H | -10.62106600 | 3.03287700  | -0.86642700 |
| H | 10.62098500  | -3.03289200 | -0.86683200 |
| H | -14.29509300 | -0.52757000 | -1.91077200 |
| H | -11.06154800 | -3.01368400 | 1.00090600  |
| H | 14.29510000  | 0.52754700  | -1.91088200 |
| H | 11.06172200  | 3.01345000  | 1.00115900  |
| H | -3.25755200  | 4.79340800  | 1.81708400  |
| H | -4.19475400  | 6.05402000  | 0.96741600  |
| H | -5.01550800  | 4.57932600  | 1.54841600  |
| H | 3.25774700   | -4.79343300 | 1.81703600  |
| H | 4.19496000   | -6.05393800 | 0.96722000  |
| H | 5.01564900   | -4.57918300 | 1.54815100  |

## ITOC-F

|   |             |             |             |
|---|-------------|-------------|-------------|
| 0 |             |             |             |
| 1 |             |             |             |
| C | -1.04164900 | -0.92187300 | -0.01396600 |
| C | -1.29433000 | 0.47108700  | 0.02222100  |
| C | -0.25424900 | 1.40560300  | 0.05751600  |
| C | 1.04242900  | 0.92467800  | 0.06497000  |
| C | 1.29508900  | -0.46823900 | 0.02762600  |
| C | 0.25503700  | -1.40276400 | -0.00751900 |
| C | -2.34894200 | -1.72785500 | -0.03456400 |
| C | 2.34975800  | 1.73053200  | 0.08861500  |
| C | -2.72743900 | 0.63099600  | 0.02555800  |
| C | -3.36224700 | -0.59559600 | 0.01217800  |
| C | -4.75868000 | -0.48827800 | 0.00811300  |
| C | -5.18697000 | 0.83370800  | 0.02639400  |
| S | -3.82479100 | 1.94795300  | 0.03138100  |
| C | 2.72817100  | -0.62821100 | 0.02543600  |
| C | 3.36308600  | 0.59827700  | 0.04178500  |
| C | 4.75952700  | 0.49080700  | 0.04743300  |
| C | 5.18759600  | -0.83125500 | 0.03027400  |
| S | 3.82533600  | -1.94521200 | 0.01188800  |
| C | -2.38631100 | -2.63014100 | 1.20365400  |
| C | -2.56310400 | -2.50914900 | -1.33741600 |
| C | 2.38930800  | 2.63444900  | -1.14834800 |
| C | -1.81042000 | -3.90390500 | 1.16991500  |
| C | -1.76379200 | -4.69693600 | 2.31122700  |
| C | -2.29217300 | -4.25189400 | 3.52608200  |
| C | -2.86188800 | -2.97691500 | 3.55604400  |
| C | -2.90839100 | -2.17847600 | 2.41741400  |
| C | -3.59226900 | -3.45530600 | -1.41338700 |
| C | -3.86419100 | -4.12192900 | -2.60102800 |
| C | -3.12054800 | -3.87203600 | -3.75945400 |
| C | -2.10145200 | -2.92236000 | -3.68120700 |
| C | -1.82549900 | -2.24997200 | -2.49262700 |
| C | 1.81355600  | 3.90825100  | -1.11382300 |
| C | 1.76815600  | 4.70246000  | -2.25433600 |
| C | 2.29775200  | 4.25856200  | -3.46908000 |
| C | 2.86749100  | 2.98362300  | -3.49973400 |
| C | 2.91270800  | 2.18391000  | -2.36195300 |
| C | -2.27510600 | -5.12553800 | 4.74846000  |
| C | -3.39714000 | -4.61971500 | -5.03305900 |
| C | 2.28140200  | 5.13327300  | -4.69068800 |
| C | 3.39191600  | 4.61368100  | 5.09355600  |
| C | 3.59130000  | 3.45555200  | 1.47214500  |
| C | 3.86174200  | 4.12006100  | 2.66127400  |
| C | 3.11643200  | 3.86840200  | 3.81829300  |
| C | 2.09712700  | 2.91925300  | 3.73692900  |
| C | 1.82263300  | 2.24899400  | 2.54673400  |
| C | 2.56196400  | 2.50978300  | 1.39299700  |
| C | -9.03924300 | 1.49191200  | 0.06927600  |

|   |              |             |             |
|---|--------------|-------------|-------------|
| C | -8.37218200  | 2.73300400  | 0.09402600  |
| C | -6.97123500  | 2.62333300  | 0.09000800  |
| C | -6.53829200  | 1.30128800  | 0.03947800  |
| S | -7.87101300  | 0.18690800  | 0.02912600  |
| C | -10.44269600 | 1.45818600  | 0.01869400  |
| C | -11.36761200 | 0.43420700  | -0.01443900 |
| C | -11.05918100 | -0.99921500 | 0.08742000  |
| C | -12.35558500 | -1.71180300 | 0.11106100  |
| C | -13.39791500 | -0.77838500 | 0.01362600  |
| C | -12.81303300 | 0.57585900  | -0.09402300 |
| O | -9.95770100  | -1.52577800 | 0.15502300  |
| C | -13.54769800 | 1.73384200  | -0.27181500 |
| C | -12.56697000 | -3.07367500 | 0.21662100  |
| C | -13.89056200 | -3.49288000 | 0.22574300  |
| C | -14.95606400 | -2.60170300 | 0.13495600  |
| C | -14.71833200 | -1.23432700 | 0.02652000  |
| C | 9.03969000   | -1.49207400 | 0.01543600  |
| C | 8.37213200   | -2.73261800 | 0.05538100  |
| C | 6.97135200   | -2.62174400 | 0.06947200  |
| C | 6.53878700   | -1.29948800 | 0.02285600  |
| S | 7.87190100   | -0.18626100 | -0.01360900 |
| O | 6.10675200   | -3.66833100 | 0.10772500  |
| C | 10.44216000  | -1.45986200 | -0.05718100 |
| C | 11.36730100  | -0.43705700 | -0.11370000 |
| C | 11.06126600  | 0.99762600  | -0.02315200 |
| C | 12.35809800  | 1.70980400  | -0.03154800 |
| C | 13.39815500  | 0.77467300  | -0.13642400 |
| C | 12.81110100  | -0.58057900 | -0.21595400 |
| O | 9.96130000   | 1.52554200  | 0.05736300  |
| C | 13.54272700  | -1.74112400 | -0.38976400 |
| C | 12.57184800  | 3.07282100  | 0.05250100  |
| C | 13.89548500  | 3.49141700  | 0.03122100  |
| C | 14.95883000  | 2.59860700  | -0.06827700 |
| O | 14.71869000  | 1.23006400  | -0.15443800 |
| C | -9.05869500  | 3.88714400  | 0.16064900  |
| O | -6.10652100  | 3.67014900  | 0.11347500  |
| O | 9.05903700   | -3.88641400 | 0.11985500  |
| C | -8.80997100  | 4.82896100  | -0.89339500 |
| C | -6.12140700  | 4.41854700  | 1.33618300  |
| C | 6.12670300   | -4.40210100 | 1.33948400  |
| C | 8.79292600   | -4.83828500 | -0.92058700 |
| C | -12.98125000 | 3.02960400  | -0.43827500 |
| N | -12.57545300 | 4.11059300  | -0.58740300 |
| C | -14.96979600 | 1.75758300  | -0.33207200 |
| N | -16.13019400 | 1.83101700  | -0.38632200 |
| C | 14.96359800  | -1.76598900 | -0.47365900 |
| N | 16.12289500  | -1.84049800 | -0.54677200 |
| C | 12.97403500  | -3.03922000 | -0.52776100 |
| N | 12.56655300  | -4.12245000 | -0.65435200 |
| H | -0.45854600  | 2.47197100  | 0.07695200  |
| H | 0.45937800   | -2.46911300 | -0.02775200 |
| H | -5.44539200  | -1.32762400 | -0.00785600 |
| H | 5.44642900   | 1.32991200  | 0.06766400  |
| H | -1.40360800  | -4.28673300 | 0.23819100  |
| H | -1.31005600  | -5.68367300 | 2.25508600  |
| H | -3.27860100  | -2.59956000 | 4.48695900  |
| H | -3.35586300  | -1.19067400 | 2.47804400  |
| H | -4.18288800  | -3.67999700 | -0.52933000 |
| H | -4.67029500  | -4.85133100 | -2.62962300 |
| H | -1.50901500  | -2.70020200 | -4.56564400 |
| H | -1.02699000  | -1.51505300 | -2.47258100 |
| H | 1.40549300   | 4.29006700  | -0.18222300 |
| H | 1.31401100   | 5.68897700  | -2.19781700 |
| H | 3.28486600   | 2.60701600  | -4.43063600 |
| H | 3.35976100   | 1.19597600  | -2.42343600 |
| H | -3.18425800  | -5.73564600 | 4.80818500  |
| H | -1.42377100  | -5.81180500 | 4.73712500  |
| H | -2.22310400  | -4.53011400 | 5.66425900  |
| H | -4.46931300  | -4.78549200 | -5.17350200 |
| H | -3.01780900  | -4.07871100 | -5.90399500 |
| H | -2.91623900  | -5.60504700 | -5.02330300 |
| H | 3.18880000   | 5.74629800  | -4.74734000 |
| H | 2.23371000   | 4.53847100  | -5.60709800 |
| H | 1.42782500   | 5.81677600  | -4.68107200 |
| H | 4.46457300   | 4.77148200  | 5.23956200  |
| H | 2.91859800   | 5.60264300  | 5.08160900  |
| H | 3.00421400   | 4.07524900  | 5.96239100  |
| H | 4.18316700   | 3.68158500  | 0.58928100  |
| H | 4.66801100   | 4.84918100  | 2.69218900  |
| H | 1.50337200   | 2.69582600  | 4.62019700  |
| H | 1.02380800   | 1.51446600  | 2.52410900  |

|   |              |             |             |
|---|--------------|-------------|-------------|
| H | -10.83420900 | 2.47195000  | 0.01490600  |
| H | -11.74516700 | -3.77767200 | 0.28908300  |
| H | -15.56311200 | -0.56164000 | -0.04160800 |
| H | 10.83270600  | -2.47399800 | -0.05998100 |
| H | 11.75175600  | 3.77813100  | 0.13133400  |
| H | 15.56190100  | 0.55619900  | -0.22991300 |
| H | -9.43299200  | 5.69367700  | -0.66927000 |
| H | -7.75653900  | 5.11656600  | -0.92621200 |
| H | -9.10836300  | 4.39978200  | -1.85420300 |
| H | -7.11030900  | 4.84904300  | 1.51846400  |
| H | -5.83601300  | 3.78096400  | 2.17867700  |
| H | -5.38804600  | 5.21532400  | 1.21221400  |
| H | 7.11669300   | -4.82997400 | 1.52235900  |
| H | 5.84453200   | -3.75445000 | 2.17524800  |
| H | 5.39319400   | -5.20060100 | 1.22809400  |
| H | 9.41928200   | -5.70099000 | -0.69805500 |
| H | 7.73910100   | -5.12571500 | -0.93363600 |
| H | 9.07602500   | -4.41882400 | -1.89031800 |
| H | 15.97144500  | 2.98685400  | -0.07736800 |
| H | -15.96846200 | -2.99033200 | 0.15010500  |
| F | 14.16354200  | 4.79675800  | 0.10998400  |
| F | -14.15644200 | -4.79715600 | 0.32637300  |

## ITOIC-2F

0 1

|   |              |             |             |
|---|--------------|-------------|-------------|
| C | -1.05640300  | 0.90470200  | 0.01085000  |
| C | -1.28671600  | -0.49210200 | -0.02777000 |
| C | -0.23188200  | -1.40995400 | -0.06198900 |
| C | 1.05692000   | -0.90837700 | -0.06606100 |
| C | 1.28719300   | 0.48839600  | -0.02684900 |
| C | 0.23239300   | 1.40625200  | 0.00745600  |
| C | -2.37641000  | 1.68974500  | 0.03074400  |
| C | 2.37699300   | -1.69328500 | -0.08793700 |
| C | -2.71691100  | -0.67486400 | -0.03346700 |
| C | -3.37141200  | 0.54153700  | -0.01850400 |
| C | -4.76571100  | 0.41155600  | -0.01479800 |
| C | -5.17246300  | -0.91736200 | -0.03539500 |
| S | -3.79242500  | -2.00945800 | -0.04233700 |
| C | 2.71735100   | 0.67124800  | -0.02259000 |
| C | 3.37200300   | -0.54503200 | -0.03910500 |
| C | 4.76631800   | -0.41483400 | -0.04443400 |
| C | 5.17277400   | 0.91421000  | -0.02696300 |
| S | 3.79261400   | 2.00594600  | -0.00852000 |
| C | -2.42627900  | 2.59293900  | -1.20639000 |
| C | -2.60436000  | 2.46610200  | 1.33422800  |
| C | 2.42849600   | -2.59718300 | 1.14860900  |
| C | -1.86565000  | 3.87350100  | -1.17119400 |
| C | -1.82915800  | 4.66862800  | -2.31134600 |
| C | -2.35306600  | 4.21905000  | -3.52652400 |
| C | -2.90778500  | 2.93756200  | -3.55785200 |
| C | -2.94395900  | 2.13690100  | -2.42033800 |
| C | -3.64556900  | 3.39906000  | 1.40883800  |
| C | -3.92887600  | 4.06050200  | 2.59674900  |
| C | -3.18521700  | 3.81820400  | 3.75674100  |
| C | -2.15427100  | 2.88123600  | 3.67990300  |
| C | -1.86676500  | 2.21419300  | 2.49109200  |
| C | 1.86780200   | -3.87770800 | 1.11335300  |
| C | 1.83206000   | -4.67318900 | 2.25324900  |
| C | 2.35688700   | -4.22396700 | 3.46816300  |
| C | 2.91184100   | -2.94259100 | 3.49945200  |
| C | 2.94721200   | -2.14148200 | 2.36223400  |
| C | -2.34683300  | 5.09449700  | -4.74770900 |
| C | -3.47418300  | 4.56069700  | 5.03062100  |
| C | 2.35085400   | -5.09960700 | 4.68919400  |
| C | 3.47103800   | -4.55928700 | -5.09162100 |
| C | 3.64475400   | -3.40147400 | -1.46877600 |
| C | 3.92712800   | -4.06170300 | -2.65754700 |
| C | 3.18255100   | -3.81826900 | -3.81676300 |
| C | 2.15156400   | -2.88154200 | -3.73808400 |
| C | 1.86497300   | -2.21571900 | -2.54829000 |
| C | 2.60355900   | -2.46859200 | -1.39227600 |
| C | -9.01311700  | -1.63761000 | -0.07496000 |
| C | -8.32590000  | -2.86810200 | -0.10557000 |
| C | -6.92713400  | -2.73570400 | -0.10322500 |
| C | -6.51577200  | -1.40666900 | -0.04848300 |
| S | -7.86627500  | -0.31392800 | -0.03157300 |
| C | -10.41621100 | -1.62726100 | -0.02227800 |
| C | -11.35819800 | -0.61861600 | 0.01815700  |

|   |              |             |              |
|---|--------------|-------------|--------------|
| C | -11.07409200 | 0.82148500  | -0.07244700  |
| C | -12.38028200 | 1.51127400  | -0.08241400  |
| C | -13.40603900 | 0.56151000  | 0.01057600   |
| C | -12.79880200 | -0.78621300 | 0.09992300   |
| O | -9.98177200  | 1.36651000  | -0.14092200  |
| C | -13.51828000 | -1.95526700 | 0.26292600   |
| C | -12.61783200 | 2.87285000  | -0.17249800  |
| C | -13.93927400 | 3.28250400  | -0.17027900  |
| C | -14.97583100 | 2.34791700  | -0.08035800  |
| C | -14.73535200 | 0.98636100  | 0.01223800   |
| C | 9.01308500   | 1.63761100  | -0.01529100  |
| C | 8.32519500   | 2.86748900  | -0.05745600  |
| C | 6.92662500   | 2.73370800  | -0.07008900  |
| C | 6.51589700   | 1.40433900  | -0.02037500  |
| S | 7.86691000   | 0.31292700  | 0.01797200   |
| O | 6.04484300   | 3.76572800  | -0.111105000 |
| C | 10.41540800  | 1.62892000  | 0.05428700   |
| C | 11.35804100  | 0.62167600  | 0.11161400   |
| C | 11.07638400  | -0.81941700 | 0.02993200   |
| C | 12.38324200  | -1.50794600 | 0.04137100   |
| C | 13.40690300  | -0.55632500 | 0.13832500   |
| C | 12.79741700  | 0.79152200  | 0.20861600   |
| O | 9.98538500   | -1.36614100 | -0.04565500  |
| C | 13.51407100  | 1.96268600  | 0.36902800   |
| C | 12.62317400  | -2.87001600 | -0.03380700  |
| C | 13.94488100  | -3.27824100 | -0.01209700  |
| C | 14.97939200  | -2.34180600 | 0.08200700   |
| C | 14.73649400  | -0.97974500 | 0.15974100   |
| F | -14.25744900 | 4.57096300  | -0.25471900  |
| F | -16.22679300 | 2.80187100  | -0.08582500  |
| F | 14.26524600  | -4.56707500 | -0.08129400  |
| F | 16.23077000  | -2.79443500 | 0.09560500   |
| O | -8.99457900  | -4.03203800 | -0.17590100  |
| O | -6.04531600  | -3.76794900 | -0.13235200  |
| O | 8.99409000   | 4.03117000  | -0.12585700  |
| C | -8.72619500  | -4.97777100 | 0.86994700   |
| C | -6.04811500  | -4.51000800 | -1.35911300  |
| C | 6.04957700   | 4.49347500  | -1.34665100  |
| C | 8.71006900   | 4.98584500  | 0.90741200   |
| C | -12.93415600 | -3.24563600 | 0.40913300   |
| N | -12.51239200 | -4.32260700 | 0.54109400   |
| C | -14.93989200 | -1.99589600 | 0.32384400   |
| N | -16.09969300 | -2.07789100 | 0.37714900   |
| C | 14.93483600  | 2.00517000  | 0.44616000   |
| N | 16.09382800  | 2.08899600  | 0.51265000   |
| C | 12.92748400  | 3.25395500  | 0.49613200   |
| N | 12.50359200  | 4.33183700  | 0.61302400   |
| H | -0.41936100  | -2.47938500 | -0.08300200  |
| H | 0.41992200   | 2.47566000  | 0.02935600   |
| H | -5.46599200  | 1.23956800  | 0.00276100   |
| H | 5.46684300   | -1.24256700 | -0.06537400  |
| H | -1.46281600  | 4.25978700  | -0.23916300  |
| H | -1.38708200  | 5.66057200  | -2.25410000  |
| H | -3.32073000  | 2.55665800  | -4.48900000  |
| H | -3.37971300  | 1.14395800  | -2.48220900  |
| H | -4.23668700  | 3.61758900  | 0.52358200   |
| H | -4.74399500  | 4.77985100  | 2.62428200   |
| H | -1.56151900  | 2.66513400  | 4.56562000   |
| H | -1.05916200  | 1.48924000  | 2.47213100   |
| H | 1.46393300   | -4.26358600 | 0.18159000   |
| H | 1.38942100   | -5.66488100 | 2.19618800   |
| H | 3.32522800   | -2.56184400 | 4.43044900   |
| H | 3.38270400   | -1.14844500 | 2.42438300   |
| H | -3.26256800  | 5.69485600  | -4.80557100  |
| H | -1.50294900  | 5.78989600  | -4.73633200  |
| H | -2.28941600  | 4.50093300  | -5.66438800  |
| H | -4.54855400  | 4.71450000  | 5.16780500   |
| H | -3.09175800  | 4.02250100  | 5.90194300   |
| H | -3.00407500  | 5.55124800  | 5.02397500   |
| H | 3.26490100   | -5.70275900 | 4.74487400   |
| H | 2.29723500   | -4.50597100 | 5.60603100   |
| H | 1.50477500   | -5.79235800 | 4.67960900   |
| H | 4.54591500   | -4.70494200 | -5.23383700  |
| H | 3.00880200   | -5.55350200 | -5.08217200  |
| H | 3.08046500   | -4.02452100 | -5.96143100  |
| H | 4.23653700   | -3.62085600 | -0.58419200  |
| H | 4.74225100   | -4.78099000 | -2.68640900  |
| H | 1.55807000   | -2.66466300 | -4.62315000  |
| H | 1.05721500   | -1.49095300 | -2.52773900  |
| H | -10.79112100 | -2.64728100 | -0.02283400  |
| H | -11.80848700 | 3.59160000  | -0.24240400  |

|   |              |             |             |
|---|--------------|-------------|-------------|
| H | -15.58517800 | 0.31959400  | 0.07823100  |
| H | 10.78918000  | 2.64935600  | 0.05337900  |
| H | 11.81540900  | -3.59020400 | -0.10712800 |
| H | 15.58484900  | -0.31155300 | 0.23008100  |
| H | -9.33441000  | -5.85150700 | 0.64040400  |
| H | -7.66783800  | -5.24691000 | 0.89782200  |
| H | -9.02941500  | -4.56137900 | 1.83484600  |
| H | -7.02946800  | -4.95681500 | -1.54295700 |
| H | -5.77472500  | -3.86300300 | -2.19835700 |
| H | -5.30076900  | -5.29439500 | -1.23990100 |
| H | 7.03163500   | 4.93749300  | -1.53380900 |
| H | 5.77702600   | 3.83674000  | -2.17847500 |
| H | 5.30254900   | 5.27966800  | -1.23773500 |
| H | 9.32235900   | 5.85720300  | 0.67972000  |
| H | 7.65166000   | 5.25572500  | 0.91672600  |
| H | 8.99825900   | 4.57779000  | 1.88048300  |

## IEICO

0 1

|   |             |             |             |
|---|-------------|-------------|-------------|
| C | 1.12281500  | 0.82504000  | -0.01410400 |
| C | 1.24604300  | -0.58443800 | 0.05565600  |
| C | 0.12416100  | -1.42033700 | 0.06661800  |
| C | -1.12278400 | -0.82499800 | 0.01454600  |
| C | -1.24601600 | 0.58448100  | -0.05519400 |
| C | -0.12413300 | 1.42038000  | -0.06616600 |
| C | 2.49855800  | 1.50841100  | 0.00598600  |
| C | -2.49852100 | -1.50837700 | -0.00560400 |
| C | 2.65629600  | -0.87355500 | 0.11048400  |
| C | 3.40229900  | 0.28943400  | 0.09818000  |
| C | 4.78126500  | 0.05518200  | 0.14345100  |
| C | 5.08663800  | -1.30158800 | 0.19578100  |
| S | 3.62651500  | -2.28441200 | 0.18319200  |
| C | -2.65627200 | 0.87359200  | -0.11001900 |
| C | -3.40226600 | -0.28939900 | -0.09775000 |
| C | -4.78123900 | -0.05515900 | -0.14302000 |
| C | -5.08662100 | 1.30160500  | -0.19531700 |
| S | -3.62651100 | 2.28444600  | -0.18266600 |
| C | 2.57415800  | 2.41511900  | 1.23979200  |
| C | 2.83006400  | 2.25744300  | -1.29051800 |
| C | -2.57408700 | -2.41501300 | -1.23945800 |
| C | 2.08611000  | 3.72475200  | 1.18459200  |
| C | 2.07190300  | 4.52983600  | 2.31780700  |
| C | 2.54776200  | 4.06201300  | 3.54614400  |
| C | 3.03072600  | 2.75281300  | 3.59708200  |
| C | 3.04345900  | 1.94149700  | 2.46625300  |
| C | 3.93417800  | 3.11778900  | -1.32641000 |
| C | 4.30942600  | 3.75065900  | -2.50417500 |
| C | 3.59838700  | 3.55126800  | -3.69256300 |
| C | 2.50452000  | 2.68612500  | -3.65415000 |
| C | 2.12480100  | 2.04757800  | -2.47537800 |
| C | -2.08608600 | -3.72463900 | -1.18433800 |
| C | -2.07184600 | -4.52964600 | -2.31764000 |
| C | -2.54763000 | -4.06172800 | -3.54593900 |
| C | -3.03057100 | -2.75248600 | -3.59679800 |
| C | -3.04332900 | -1.94127600 | -2.46592700 |
| C | 2.56665100  | 4.94706400  | 4.76029200  |
| C | 3.98866300  | 4.26428700  | -4.95634500 |
| C | -2.56656400 | -4.94655700 | -4.76024700 |
| C | -3.98911400 | -4.26437200 | 4.95652100  |
| C | -3.93421900 | -3.11780700 | 1.32666700  |
| C | -4.30949400 | -3.75076100 | 2.50434600  |
| C | -3.59846400 | -3.55146700 | 3.69278700  |
| C | -2.50456200 | -2.68640900 | 3.65444600  |
| C | -2.12479700 | -2.04775700 | 2.47571300  |
| C | -2.83005700 | -2.25747600 | 1.29085700  |
| C | 8.85938700  | -2.30609300 | 0.27817100  |
| C | 8.10241500  | -3.47651900 | 0.34373600  |
| C | 6.72416400  | -3.24558200 | 0.34337600  |
| C | 6.38754300  | -1.88632900 | 0.24483100  |
| S | 7.81671400  | -0.91492400 | 0.17378800  |
| C | 10.26527800 | -2.29134700 | 0.14548500  |
| C | 11.20776300 | -1.29252500 | 0.09036400  |
| C | 12.48910400 | -1.59973500 | -0.60660600 |
| C | 13.10747200 | -0.28944300 | -0.91116400 |
| C | 12.32763400 | 0.73418600  | -0.34578000 |
| C | 11.22924300 | 0.11326500  | 0.42656500  |
| O | 12.90995900 | -2.70153300 | -0.91179100 |
| C | 10.54169800 | 0.72169700  | 1.45976300  |

|   |              |             |             |
|---|--------------|-------------|-------------|
| C | 14.25054800  | -0.02427900 | -1.64623800 |
| C | 14.61204500  | 1.30846600  | -1.83689200 |
| C | 13.83471700  | 2.33415000  | -1.29479700 |
| C | 12.69265300  | 2.06484300  | -0.53902300 |
| C | -8.85937500  | 2.30605300  | -0.27809600 |
| C | -8.10242800  | 3.47650700  | -0.34334500 |
| C | -6.72416300  | 3.24559800  | -0.34279300 |
| C | -6.38753100  | 1.88633900  | -0.24445000 |
| S | -7.81669900  | 0.91489400  | -0.17382200 |
| C | -10.26529300 | 2.29126500  | -0.14561800 |
| C | -11.20778400 | 1.29243300  | -0.09079000 |
| C | -12.48924300 | 1.59953600  | 0.60602100  |
| C | -13.10761900 | 0.28919400  | 0.91034600  |
| C | -12.32767200 | -0.73435000 | 0.34496100  |
| C | -11.22919200 | -0.11332500 | -0.42716100 |
| O | -12.91019000 | 2.70129200  | 0.91123100  |
| C | -10.54149600 | -0.72160600 | -1.46034300 |
| C | -14.25079800 | 0.02391700  | 1.64522000  |
| C | -14.61229200 | -1.30885600 | 1.83566200  |
| C | -13.83486600 | -2.33446100 | 1.29355300  |
| C | -12.69269700 | -2.06504000 | 0.53798300  |
| C | 9.81842900   | -0.02387900 | 2.43204300  |
| N | 9.27017000   | -0.61078500 | 3.27399400  |
| C | 10.63098800  | 2.11405300  | 1.74020000  |
| N | 10.66924300  | 3.25080000  | 1.98656200  |
| C | -10.63070900 | -2.11393100 | -1.74095400 |
| N | -10.66892100 | -3.25064800 | -1.98746000 |
| C | -9.81814100  | 0.02413000  | -2.43243800 |
| N | -9.26980900  | 0.61117800  | -3.27424200 |
| H | 0.23213100   | -2.49995900 | 0.11265000  |
| H | -0.23210400  | 2.50000100  | -0.11220400 |
| H | 5.54252100   | 0.82765400  | 0.14182200  |
| H | -5.54248200  | -0.82764300 | -0.14140100 |
| H | 1.72304100   | 4.12535600  | 0.24222000  |
| H | 1.68612800   | 5.54403700  | 2.24510300  |
| H | 3.40590200   | 2.35753500  | 4.53811600  |
| H | 3.42360400   | 0.92718300  | 2.54390300  |
| H | 4.50172000   | 3.30171000  | -0.41817700 |
| H | 5.17118000   | 4.41411200  | -2.50090900 |
| H | 1.93454000   | 2.50482100  | -4.56231200 |
| H | 1.27024800   | 1.37830600  | -2.48621600 |
| H | -1.72306200  | -4.12533300 | -0.24198700 |
| H | -1.68610200  | -5.54386100 | -2.24500300 |
| H | -3.40568400  | -2.35711700 | -4.53782300 |
| H | -3.42343500  | -0.92694300 | -2.54350600 |
| H | 3.50182800   | 5.51679200  | 4.81683700  |
| H | 1.74663100   | 5.67040100  | 4.74001100  |
| H | 2.48584700   | 4.36314700  | 5.68131000  |
| H | 5.07597400   | 4.30830500  | -5.07017000 |
| H | 3.57262800   | 3.77032200  | -5.83834300 |
| H | 3.62259500   | 5.29779400  | -4.95440700 |
| H | -3.50437800  | -5.51157700 | -4.82024800 |
| H | -2.47964900  | -4.36292200 | -5.68090800 |
| H | -1.75019200  | -5.67389900 | -4.73717300 |
| H | -5.07632900  | -4.30143200 | 5.07395000  |
| H | -3.62999400  | -5.30028900 | 4.95133500  |
| H | -3.56693000  | -3.77480900 | 5.83803400  |
| H | -4.50172400  | -3.30166300 | 0.41839700  |
| H | -5.17124100  | -4.41422700 | 2.50098800  |
| H | -1.93455500  | -2.50525600 | 4.56261800  |
| H | -1.27018200  | -1.37856500 | 2.48661700  |
| H | 8.56467500   | -4.45477400 | 0.39231200  |
| H | 10.68743700  | -3.27261000 | -0.08019700 |
| H | 14.83627200  | -0.84003500 | -2.05828800 |
| H | 12.11043900  | 2.88334700  | -0.13401600 |
| H | -8.56469300  | 4.45476300  | -0.39182300 |
| H | -10.68750200 | 3.27249500  | 0.08011900  |
| H | -14.83659800 | 0.83961500  | 2.05727800  |
| H | -12.11041500 | -2.88348100 | 0.13294700  |
| O | 5.73921900   | -4.15623500 | 0.41264900  |
| O | -5.73923400  | 4.15630200  | -0.41170500 |
| C | 6.12352200   | -5.52061800 | 0.49817300  |
| C | -6.12359400  | 5.52065100  | -0.49748600 |
| H | 5.19761900   | -6.09185100 | 0.55012900  |
| H | 6.69161100   | -5.82374500 | -0.38802500 |
| H | 6.71790600   | -5.70336300 | 1.39988800  |
| H | -6.69201900  | 5.82382300  | 0.38848200  |
| H | -5.19770900  | 6.09194200  | -0.54914700 |
| H | -6.71767300  | 5.70327500  | -1.39942700 |
| H | 14.12301500  | 3.36726600  | -1.46268700 |
| H | 15.49904700  | 1.55409000  | -2.41249100 |

|   |              |             |            |
|---|--------------|-------------|------------|
| H | -14.12317300 | -3.36760300 | 1.46127100 |
| H | -15.49937200 | -1.55457000 | 2.41110300 |

## ATT-2

|     |              |             |             |
|-----|--------------|-------------|-------------|
| 0 1 |              |             |             |
| C   | 1.41940100   | -0.31831100 | -0.11217900 |
| C   | 0.61461900   | 0.82423800  | -0.16332200 |
| C   | -0.75625200  | 0.64455900  | -0.14023700 |
| C   | -1.30891400  | -0.65697400 | -0.05986600 |
| C   | -0.50415900  | -1.79971200 | -0.01214400 |
| C   | 0.86677700   | -1.62001600 | -0.03430100 |
| C   | -1.85258600  | 1.72012200  | -0.16544000 |
| C   | -3.09089000  | 0.84322500  | -0.07211600 |
| C   | -2.73989600  | -0.49154100 | -0.03245100 |
| C   | 1.96338600   | -2.69559800 | -0.00595700 |
| C   | 3.20269200   | -1.81789700 | -0.07796100 |
| C   | 2.85043000   | -0.48269500 | -0.12603500 |
| C   | -4.47817300  | 1.05029800  | -0.05832500 |
| C   | -5.18331300  | -0.14476400 | 0.00559800  |
| S   | -4.10340600  | -1.52721700 | 0.03960000  |
| C   | 4.58833800   | -2.02200500 | -0.07910600 |
| C   | 5.29499200   | -0.82629500 | -0.13341100 |
| S   | 4.21243300   | 0.55434200  | -0.16560400 |
| C   | 1.78860400   | -3.59998200 | -1.23155600 |
| C   | 2.01020800   | -3.48652300 | 1.30725400  |
| C   | -1.66486000  | 2.63787000  | 1.04788700  |
| C   | -1.91371300  | 2.49848200  | -1.48586500 |
| C   | 0.92155400   | -4.69634600 | -1.18268800 |
| C   | 0.68793200   | -5.47241200 | -2.31208100 |
| C   | 1.31266600   | -5.18797600 | -3.52992700 |
| C   | 2.17496000   | -4.09054900 | -3.57433000 |
| C   | 2.40941000   | -3.30820800 | -2.44738600 |
| C   | 2.78458700   | -4.64992500 | 1.38520400  |
| C   | 2.91456200   | -5.34251600 | 2.58217600  |
| C   | 2.27741600   | -4.90268300 | 3.74720600  |
| C   | 1.51373900   | -3.73758100 | 3.66638000  |
| C   | 1.38114200   | -3.03850900 | 2.46898000  |
| C   | -0.79388600  | 3.73003500  | 0.97779500  |
| C   | -0.54855300  | 4.51997300  | 2.09484300  |
| C   | -1.16579400  | 4.25453800  | 3.32083700  |
| C   | -2.03246400  | 3.16176500  | 3.38625500  |
| C   | -2.27819400  | 2.36503400  | 2.27173300  |
| C   | -2.69465700  | 3.65741000  | -1.56713100 |
| C   | -2.83771200  | 4.33909600  | -2.76867000 |
| C   | -2.20690100  | 3.89302400  | -3.93491300 |
| C   | -1.43576000  | 2.73327700  | -3.85028100 |
| C   | -1.29049500  | 2.04449800  | -2.64823700 |
| C   | 1.08513100   | -6.04986500 | -4.73943000 |
| C   | 2.39352100   | -5.67327700 | 5.03175400  |
| C   | -2.33841000  | 4.65224000  | -5.22471600 |
| C   | -0.92613800  | 5.13222200  | 4.51654000  |
| C   | -6.60269100  | -0.31581300 | 0.05550700  |
| C   | 6.71322300   | -0.64785700 | -0.15346700 |
| S   | -7.37271600  | -1.80841900 | -0.35637100 |
| C   | -8.98661200  | -1.20990100 | -0.06375100 |
| C   | -8.91070300  | 0.13138600  | 0.35691900  |
| C   | -7.57703100  | 0.61351700  | 0.41269900  |
| S   | 7.78040900   | -1.96225800 | 0.20825700  |
| C   | 9.23105000   | -1.01022900 | 0.01614400  |
| C   | 8.87665600   | 0.30385800  | -0.33992900 |
| C   | 7.47175100   | 0.48958500  | -0.42525600 |
| C   | 9.59148200   | 1.47103300  | -0.73494100 |
| C   | 8.74630300   | 2.49113400  | -1.06309800 |
| S   | 7.05267500   | 2.09648800  | -0.93413700 |
| C   | -9.83974900  | 1.09030100  | 0.85477300  |
| C   | -9.21755300  | 2.24497000  | 1.23285400  |
| S   | -7.48582500  | 2.23272700  | 1.02763200  |
| C   | 10.47391100  | -1.66366500 | 0.13252000  |
| C   | -10.05560900 | -2.12077700 | -0.17587900 |
| C   | 11.75550200  | -1.19365100 | 0.31296300  |
| C   | -11.41869800 | -1.95274300 | -0.27214500 |
| C   | 12.87274500  | -2.09444900 | -0.09405900 |
| C   | 14.09345900  | -1.25994400 | -0.08811800 |
| C   | 13.77345600  | 0.02163600  | 0.39046700  |
| C   | 12.34584900  | 0.03671800  | 0.78607100  |
| C   | -12.27174400 | -3.11394600 | 0.11507600  |
| C   | -13.65055600 | -2.59083800 | 0.22144800  |
| C   | -13.66425800 | -1.24304400 | -0.17509800 |

|   |              |             |             |
|---|--------------|-------------|-------------|
| C | -12.30428500 | -0.86905100 | -0.62845000 |
| C | 15.37362600  | -1.60084600 | -0.49045800 |
| C | 16.36223700  | -0.62014600 | -0.42792500 |
| C | 16.05290300  | 0.66219700  | 0.02984400  |
| C | 14.76497600  | 0.99902500  | 0.44971900  |
| C | -14.79170700 | -3.24710200 | 0.65052000  |
| C | -15.98237500 | -2.52422500 | 0.70093700  |
| C | -16.00552100 | -1.17954300 | 0.32525800  |
| C | -14.85696300 | -0.52447600 | -0.12226200 |
| O | 12.78295600  | -3.26816200 | -0.40761700 |
| C | 11.77033200  | 0.95872600  | 1.64144700  |
| C | -12.00742800 | 0.21283100  | -1.43736800 |
| O | -11.89464000 | -4.25058900 | 0.33819000  |
| C | 9.08484200   | 3.85567800  | -1.50543800 |
| O | 8.24978300   | 4.69292600  | -1.77814700 |
| O | 10.40233600  | 4.04551400  | -1.56613100 |
| C | 10.81123300  | 5.35271600  | -1.98337300 |
| C | -9.82082400  | 3.47173800  | 1.78327800  |
| O | -9.17391800  | 4.45194600  | 2.08888800  |
| O | -11.14384500 | 3.36496200  | 1.90060000  |
| C | -11.80513800 | 4.52204300  | 2.42384400  |
| C | 10.51148300  | 0.74286100  | 2.26672800  |
| N | 9.50698900   | 0.57355600  | 2.82907800  |
| C | 12.43759000  | 2.13651900  | 2.08157300  |
| N | 12.94596100  | 3.11628300  | 2.45029700  |
| C | -10.77210100 | 0.33235500  | -2.13155500 |
| N | -9.79046300  | 0.43259900  | -2.74817000 |
| C | -12.95132000 | 1.22847700  | -1.75921100 |
| N | -13.69148500 | 2.08440800  | -2.03098300 |
| H | 1.05300500   | 1.81634300  | -0.21543000 |
| H | -0.94239400  | -2.79193200 | 0.04058000  |
| H | -4.95943800  | 2.01865100  | -0.13154100 |
| H | 5.07359300   | -2.99154700 | -0.05376400 |
| H | 0.43101600   | -4.95425000 | -0.24831200 |
| H | 0.00772200   | -6.31820700 | -2.24482300 |
| H | 2.67354500   | -3.84022300 | -4.50775100 |
| H | 3.08272700   | -2.45922400 | -2.52070300 |
| H | 3.28530400   | -5.02355500 | 0.49612200  |
| H | 3.52291600   | -6.24342700 | 2.61267300  |
| H | 1.01170700   | -3.36479700 | 4.55596300  |
| H | 0.78283200   | -2.13307700 | 2.44751600  |
| H | -0.30979300  | 3.97380300  | 0.03625000  |
| H | 0.13449200   | 5.36198000  | 2.01123800  |
| H | -2.52626000  | 2.92701500  | 4.32621900  |
| H | -2.95524300  | 1.52057200  | 2.36125700  |
| H | -3.19008500  | 4.03621000  | -0.67726100 |
| H | -3.45158700  | 5.23609800  | -2.80178700 |
| H | -0.93751400  | 2.35664200  | -4.74038800 |
| H | -0.68619000  | 1.14311800  | -2.62377500 |
| H | 0.07539500   | -6.46985900 | -4.74595800 |
| H | 1.22698700   | -5.48471100 | -5.66467400 |
| H | 1.78733900   | -6.89180400 | -4.76029200 |
| H | 3.39046100   | -6.10838800 | 5.14728300  |
| H | 2.19561600   | -5.03681500 | 5.89829100  |
| H | 1.67403400   | -6.50018800 | 5.06078200  |
| H | -3.34686300  | 5.05804200  | -5.34740400 |
| H | -1.64296300  | 5.49938300  | -5.25527100 |
| H | -2.11854500  | 4.01644500  | -6.08639700 |
| H | 0.08875800   | 5.53972100  | 4.51537500  |
| H | -1.61786000  | 5.98298900  | 4.52462000  |
| H | -1.07387500  | 4.58344900  | 5.45066700  |
| H | 10.66660800  | 1.56694400  | -0.78838800 |
| H | -10.90724400 | 0.94939000  | 0.94719300  |
| H | 10.45244500  | -2.74429900 | -0.02603300 |
| H | -9.78114700  | -3.17481100 | -0.09152200 |
| H | 15.58524800  | -2.60506600 | -0.84417200 |
| H | 17.37659300  | -0.84932800 | -0.73917500 |
| H | 16.83084200  | 1.41879500  | 0.06204500  |
| H | 14.56089500  | 2.00395100  | 0.79757600  |
| H | -14.74469900 | -4.29280100 | 0.93804400  |
| H | -16.89638300 | -3.00410600 | 1.03653800  |
| H | -16.93819100 | -0.62663000 | 0.38028500  |
| H | -14.91104400 | 0.51949200  | -0.40460800 |
| H | 11.89950000  | 5.33598700  | -1.97355100 |
| H | 10.43894400  | 5.56511800  | -2.98776500 |
| H | 10.43310200  | 6.10766400  | -1.29105200 |
| H | -12.86245800 | 4.26550600  | 2.45545800  |
| H | -11.43494100 | 4.75168700  | 3.42522300  |
| H | -11.63898600 | 5.38191400  | 1.77162400  |



# IEICO4F

|   |   |              |             |             |
|---|---|--------------|-------------|-------------|
| 0 | 1 |              |             |             |
| C |   | 1.14813200   | 0.78878200  | 0.03514800  |
| C |   | 1.22623900   | -0.62576000 | 0.04596300  |
| C |   | 0.07870800   | -1.42535900 | 0.00672100  |
| C |   | -1.14799000  | -0.78892300 | -0.03517900 |
| C |   | -1.22609800  | 0.62562000  | -0.04598500 |
| C |   | -0.07856600  | 1.42521700  | -0.00675600 |
| C |   | 2.54364300   | 1.42697900  | 0.10146500  |
| C |   | -2.54350300  | -1.42712100 | -0.10147900 |
| C |   | 2.62557700   | -0.96162300 | 0.10916500  |
| C |   | 3.40728700   | 0.17731000  | 0.15961700  |
| C |   | 4.77681400   | -0.10179100 | 0.21573700  |
| C |   | 5.03966200   | -1.46890200 | 0.21138500  |
| S |   | 3.55044300   | -2.40405400 | 0.13238400  |
| C |   | -2.62543500  | 0.96148100  | -0.10916500 |
| C |   | -3.40714900  | -0.17745300 | -0.15959800 |
| C |   | -4.77668100  | 0.10164900  | -0.21553500 |
| C |   | -5.03953500  | 1.46876200  | -0.21107000 |
| S |   | -3.55030300  | 2.40391100  | -0.13215800 |
| C |   | 2.62863800   | 2.28485800  | 1.36900900  |
| C |   | 2.91966800   | 2.21129000  | -1.16175800 |
| C |   | -2.62851000  | -2.28498900 | -1.36902800 |
| C |   | 2.19609500   | 3.61478600  | 1.35308500  |
| C |   | 2.19070000   | 4.37771000  | 2.51525000  |
| C |   | 2.62013600   | 3.84550700  | 3.73441900  |
| C |   | 3.04670000   | 2.51584800  | 3.74603800  |
| C |   | 3.05046600   | 1.74674500  | 2.58612400  |
| C |   | 4.05833900   | 3.02576700  | -1.15288200 |
| C |   | 4.47348200   | 3.68697900  | -2.30148200 |
| C |   | 3.76931700   | 3.56294300  | -3.50396600 |
| C |   | 2.63989600   | 2.74372500  | -3.51009100 |
| C |   | 2.22021300   | 2.07697400  | -2.36100700 |
| C |   | -2.19591600  | -3.61491000 | -1.35312600 |
| C |   | -2.19053300  | -4.37782400 | -2.51528600 |
| C |   | -2.62002300  | -3.84562100 | -3.73444900 |
| C |   | -3.04663200  | -2.51598700 | -3.74604500 |
| C |   | -3.05039500  | -1.74688700 | -2.58611800 |
| C |   | 2.64902700   | 4.68402300  | 4.98097500  |
| C |   | 4.20240200   | 4.30701600  | -4.73545300 |
| C |   | -2.64888400  | -4.68416700 | -4.98098500 |
| C |   | -4.20226200  | -4.30721000 | 4.73541200  |
| C |   | -4.05813900  | -3.02599200 | 1.15286500  |
| C |   | -4.47323700  | -3.68723700 | 2.30144600  |
| C |   | -3.76908000  | -3.56315300 | 3.50394800  |
| C |   | -2.63972400  | -2.74387300 | 3.51007900  |
| C |   | -2.22007000  | -2.07708400 | 2.36098800  |
| C |   | -2.91950200  | -2.21144100 | 1.16174700  |
| C |   | 8.77716900   | -2.59458700 | 0.30049000  |
| C |   | 7.98284900   | -3.74268400 | 0.28515900  |
| C |   | 6.61353500   | -3.46850900 | 0.27784100  |
| C |   | 6.32060200   | -2.09480300 | 0.25254600  |
| S |   | 7.77986600   | -1.16664100 | 0.26228000  |
| C |   | 10.18338000  | -2.61517500 | 0.19161800  |
| C |   | 11.15490100  | -1.64117900 | 0.22192500  |
| C |   | 12.43482400  | -1.93059900 | -0.48015800 |
| C |   | 13.09878500  | -0.61957700 | -0.66272200 |
| C |   | 12.34358200  | 0.37622900  | -0.02410900 |
| C |   | 11.20958600  | -0.26960200 | 0.67193700  |
| O |   | 12.83170300  | -3.01245600 | -0.87378300 |
| C |   | 10.51620600  | 0.27995300  | 1.73389300  |
| C |   | 14.26570300  | -0.34206100 | -1.35618600 |
| C |   | 14.66485100  | 0.98177800  | -1.41500900 |
| C |   | 13.91403200  | 1.98527700  | -0.79327100 |
| C |   | 12.75589900  | 1.70638000  | -0.08455200 |
| C |   | -8.77703200  | 2.59451900  | -0.29988200 |
| C |   | -7.98268200  | 3.74259600  | -0.28382900 |
| C |   | -6.61338200  | 3.46840200  | -0.27661600 |
| C |   | -6.32046800  | 2.09467200  | -0.25210100 |
| S |   | -7.77973800  | 1.16653300  | -0.26255400 |
| C |   | -10.18323200 | 2.61514100  | -0.19102900 |
| C |   | -11.15487600 | 1.64126700  | -0.22171600 |
| C |   | -12.43474300 | 1.93060900  | 0.48049200  |
| C |   | -13.09892500 | 0.61962100  | 0.66251600  |
| C |   | -12.34388400 | -0.37605000 | 0.02351000  |
| O |   | -11.20975600 | 0.26987800  | -0.67223900 |
| C |   | -12.83145000 | 3.01236300  | 0.87457700  |
| C |   | -10.51638100 | -0.27940000 | -1.73434500 |
| C |   | -14.26594900 | 0.34205500  | 1.35578500  |

|   |              |             |             |
|---|--------------|-------------|-------------|
| C | -14.66537800 | -0.98172400 | 1.41399800  |
| C | -13.91472900 | -1.98510200 | 0.79185000  |
| C | -12.75649300 | -1.70614300 | 0.08333200  |
| C | 9.74713700   | -0.51424500 | 2.62915800  |
| N | 9.16062000   | -1.14766800 | 3.40926100  |
| C | 10.64043900  | 1.64444100  | 2.11716700  |
| N | 10.71234600  | 2.76019200  | 2.44017600  |
| C | -10.64066300 | -1.64377400 | -2.11802200 |
| N | -10.71256400 | -2.75943600 | -2.44134100 |
| C | -9.74725900  | 0.51501400  | -2.62936600 |
| N | -9.16068300  | 1.14860800  | -3.40928500 |
| H | 0.15152900   | -2.50886800 | 0.00727100  |
| H | -0.15138200  | 2.50872700  | -0.00730300 |
| H | 5.56109000   | 0.64599200  | 0.25929700  |
| H | -5.56095700  | -0.64614000 | -0.25900300 |
| H | 1.86997000   | 4.06416300  | 0.41924000  |
| H | 1.84902200   | 5.40929200  | 2.47286200  |
| H | 3.38417600   | 2.07090400  | 4.67911800  |
| H | 3.38567100   | 0.71479000  | 2.63330500  |
| H | 4.62224700   | 3.15132900  | -0.23246000 |
| H | 5.36202200   | 4.31296800  | -2.26357500 |
| H | 2.07358700   | 2.62086200  | -4.43028500 |
| H | 1.33883700   | 1.44502600  | -2.40720200 |
| H | -1.86974600  | -4.06427700 | -0.41929300 |
| H | -1.84881900  | -5.40939500 | -2.47291700 |
| H | -3.38415200  | -2.07105000 | -4.67911200 |
| H | -3.38564000  | -0.71494400 | -2.63328500 |
| H | 3.60231200   | 5.21787400  | 5.07358300  |
| H | 1.85512900   | 5.43618800  | 4.97459500  |
| H | 2.53202500   | 4.06994100  | 5.87815400  |
| H | 5.29275200   | 4.35336600  | -4.81110400 |
| H | 3.81637600   | 3.83570900  | -5.64321100 |
| H | 3.83537800   | 5.34014200  | -4.72046500 |
| H | -3.60141300  | -5.21953300 | -5.07260700 |
| H | -2.53374600  | -4.06990300 | -5.87827500 |
| H | -1.85380500  | -5.43509900 | -4.97541600 |
| H | -5.29262700  | -4.35009000 | 4.81305000  |
| H | -3.83869900  | -5.34152500 | 4.71855000  |
| H | -3.81304100  | -3.83817200 | 5.64297100  |
| H | -4.62202400  | -3.15159100 | 0.23243500  |
| H | -5.36172600  | -4.31329900 | 2.26352500  |
| H | -2.07341800  | -2.62098700 | 4.43027100  |
| H | -1.33872200  | -1.44509800 | 2.40719200  |
| H | 8.41325800   | -4.73644000 | 0.28392400  |
| H | 10.58108900  | -3.59097000 | -0.09384200 |
| H | 14.84650300  | -1.12240900 | -1.83600900 |
| H | 12.21808500  | 2.52541600  | 0.37634100  |
| H | -8.41307700  | 4.73635700  | -0.28199900 |
| H | -10.58085500 | 3.59084700  | 0.09485100  |
| H | -14.84659900 | 1.12233100  | 1.83590500  |
| H | -12.21883000 | -2.52509100 | -0.37789400 |
| O | 5.59988400   | -4.34896900 | 0.27929000  |
| O | -5.59971700  | 4.34884700  | -0.27752300 |
| C | 5.93946000   | -5.72814400 | 0.28824700  |
| C | -5.93928100  | 5.72803300  | -0.28529200 |
| H | 4.99513600   | -6.27076800 | 0.29350600  |
| H | 6.51115700   | -5.99622600 | -0.60686800 |
| H | 6.51373200   | -5.98300900 | 1.18547200  |
| H | -6.51085800  | 5.99537200  | 0.61012200  |
| H | -4.99495300  | 6.27065000  | -0.29023400 |
| H | -6.51367300  | 5.98364900  | -1.18222700 |
| F | -15.76890300 | -1.33556600 | 2.06658400  |
| F | -14.34390400 | -3.23988300 | 0.89638900  |
| F | 15.76826100  | 1.33554900  | -2.06783200 |
| F | 14.34292400  | 3.24010200  | -0.89840000 |

## DTCCIC-C17

|     |             |             |             |
|-----|-------------|-------------|-------------|
| 0 1 |             |             |             |
| C   | -2.97911700 | 1.22305300  | -0.06167500 |
| C   | -2.75304500 | -0.18196400 | -0.02218400 |
| C   | -1.46748200 | -0.68176000 | -0.01335000 |
| C   | -0.40370000 | 0.22923300  | -0.06462200 |
| C   | -0.65258300 | 1.63054400  | -0.12014600 |
| C   | -1.94348300 | 2.15181000  | -0.10911600 |
| C   | 1.02204400  | 0.06899900  | -0.07175900 |
| C   | 1.57538400  | 1.37976800  | -0.13096600 |
| N   | 0.55077800  | 2.30062900  | -0.17493800 |
| C   | 1.85735400  | -1.05576200 | -0.03262800 |
| C   | 3.22135100  | -0.85421100 | -0.05675400 |

|   |              |             |             |
|---|--------------|-------------|-------------|
| C | 3.75353000   | 0.46579500  | -0.10032200 |
| C | 2.95013000   | 1.60153800  | -0.13517900 |
| C | 0.71315500   | 3.73399300  | -0.20400800 |
| C | 4.33571200   | -1.91115700 | -0.01409100 |
| C | 5.55966800   | -1.00911400 | -0.01748300 |
| C | 5.18622000   | 0.32531300  | -0.08453200 |
| C | 6.94225000   | -1.17777800 | 0.01619400  |
| C | 7.63779000   | 0.03529900  | -0.04699800 |
| S | 6.52121100   | 1.39016200  | -0.12475000 |
| C | -4.40612900  | 1.40661100  | -0.01951600 |
| C | -5.06760900  | 0.18580500  | 0.05915300  |
| C | -4.07269700  | -0.96480800 | 0.04028700  |
| S | -5.47662900  | 2.72943200  | -0.04151900 |
| C | -6.87106600  | 1.64336700  | 0.05682700  |
| C | -6.45372000  | 0.30760200  | 0.10089600  |
| C | 4.19319100   | -2.73201100 | 1.27275000  |
| C | 4.38975600   | -2.79295600 | -1.26904600 |
| C | -4.09112600  | -1.80581100 | 1.32144100  |
| C | -4.34504000  | -1.80671700 | -1.21390200 |
| C | -5.41944900  | -2.70573600 | -1.21848000 |
| C | -5.74120000  | -3.42918500 | -2.35861400 |
| C | -5.00481300  | -3.28599700 | -3.54040900 |
| C | -3.94008200  | -2.38540500 | -3.53316800 |
| C | -3.61380900  | -1.65548800 | -2.39109100 |
| C | -3.56014600  | -3.09904800 | 1.32699000  |
| C | -3.49005600  | -3.83773900 | 2.50341200  |
| C | -3.95018300  | -3.31676000 | 3.71552400  |
| C | -4.47522600  | -2.02216400 | 3.70601200  |
| C | -4.54415800  | -1.27809600 | 2.53246700  |
| C | 3.36955300   | -3.86204100 | 1.30515000  |
| C | 3.16570600   | -4.56361200 | 2.48815200  |
| C | 3.77792100   | -4.16865400 | 3.68112800  |
| C | 4.59527600   | -3.03684900 | 3.64505700  |
| C | 4.79938100   | -2.32929400 | 2.46422000  |
| C | 5.20509000   | -3.93156300 | -1.28050200 |
| C | 5.33496800   | -4.70617900 | -2.42547200 |
| C | 4.65770300   | -4.37625700 | -3.60497600 |
| C | 3.85368500   | -3.23657300 | -3.59125900 |
| C | 3.72055800   | -2.45568400 | -2.44483600 |
| C | -5.34344000  | -4.09085700 | -4.76326700 |
| C | -3.90870600  | -4.13025800 | 4.97822700  |
| C | 4.78161300   | -5.23377900 | -4.83252900 |
| C | 3.58471700   | -4.95084300 | 4.94939500  |
| C | -8.13609400  | 2.27607000  | 0.08435300  |
| C | 9.04113300   | 0.13335000  | 0.10668900  |
| C | 9.93902600   | 1.17033900  | 0.08302000  |
| C | -9.42865600  | 1.79457300  | 0.11517000  |
| C | -10.62739100 | 2.62871400  | 0.13879800  |
| C | -11.79809100 | 1.73755700  | -0.01406100 |
| C | -11.34721600 | 0.41144900  | -0.05215300 |
| C | -9.87402000  | 0.38178400  | 0.04633400  |
| C | 11.21845100  | 0.98254000  | 0.82719200  |
| C | 11.76312100  | 2.34209400  | 1.04177700  |
| C | 10.94950400  | 3.27847600  | 0.38066900  |
| C | 9.90486700   | 2.54613500  | -0.36631500 |
| C | 12.87119500  | 2.72140200  | 1.78096400  |
| C | 13.16084000  | 4.08147700  | 1.87511100  |
| C | 12.34867800  | 5.02180100  | 1.23675200  |
| C | 11.24251300  | 4.63731900  | 0.47819800  |
| C | -13.16699400 | 1.99355100  | -0.10932300 |
| C | -14.03785300 | 0.91140400  | -0.23604900 |
| C | -13.57243600 | -0.40518100 | -0.26500200 |
| C | -12.20741200 | -0.66675900 | -0.17238100 |
| C | 9.22241100   | 3.03287000  | -1.46322200 |
| C | -10.71300100 | 3.99661300  | 0.31677600  |
| O | -9.19936700  | -0.63697500 | 0.05486200  |
| O | 11.68416900  | -0.06934000 | 1.22695400  |
| C | -11.94353900 | 4.71404500  | 0.31674300  |
| N | -12.91491300 | 5.35489100  | 0.32465500  |
| C | -9.60294500  | 4.85778800  | 0.55123900  |
| N | -8.73640300  | 5.60839800  | 0.75364900  |
| C | 8.55842000   | 2.17597200  | -2.38529700 |
| N | 8.05785100   | 1.49716300  | -3.18666500 |
| C | 9.26027000   | 4.39959200  | -1.85959000 |
| N | 9.25674300   | 5.51163500  | -2.20193900 |
| H | -1.28078700  | -1.75056500 | 0.03817300  |
| H | -2.13925200  | 3.21859000  | -0.12498100 |
| H | 1.43800000   | -2.05626900 | 0.01897800  |
| H | 3.37792400   | 2.59823300  | -0.15704500 |
| H | 1.62147700   | 3.98785500  | -0.75344100 |
| H | -0.12928700  | 4.18675800  | -0.72966300 |

|   |              |             |             |
|---|--------------|-------------|-------------|
| H | 0.77459100   | 4.15707400  | 0.80425900  |
| H | 7.46146400   | -2.12703900 | 0.08935000  |
| H | -7.17429200  | -0.49729700 | 0.15930500  |
| H | -6.00719100  | -2.84672200 | -0.31547000 |
| H | -6.58163300  | -4.11885400 | -2.33176400 |
| H | -3.35070200  | -2.24761400 | -4.43658700 |
| H | -2.77995400  | -0.96158700 | -2.42553200 |
| H | -3.20599300  | -3.53993400 | 0.39952200  |
| H | -3.07181300  | -4.84127100 | 2.47704200  |
| H | -4.83770600  | -1.58571300 | 4.63377100  |
| H | -4.95398600  | -0.27273700 | 2.56462500  |
| H | 2.88906700   | -4.20489300 | 0.39318100  |
| H | 2.51926300   | -5.43816800 | 2.48287900  |
| H | 5.08247900   | -2.70006900 | 4.55710000  |
| H | 5.43761300   | -1.45059200 | 2.47585600  |
| H | 5.73749300   | -4.22109500 | -0.37850000 |
| H | 5.97510600   | -5.58514400 | -2.40379600 |
| H | 3.31934400   | -2.94870900 | -4.49349900 |
| H | 3.08870700   | -1.57374000 | -2.47383000 |
| H | -6.42238400  | -4.10202300 | -4.94628700 |
| H | -4.85088300  | -3.69106400 | -5.65336100 |
| H | -5.02595900  | -5.13394400 | -4.64948900 |
| H | -4.83662500  | -4.69946900 | 5.10996700  |
| H | -3.08548200  | -4.84990700 | 4.96267400  |
| H | -3.79081100  | -3.49368600 | 5.85960500  |
| H | 5.82083100   | -5.52699100 | -5.01033300 |
| H | 4.19991600   | -6.15721300 | -4.72886700 |
| H | 4.41775100   | -4.71250600 | -5.72164500 |
| H | 2.58369500   | -5.38863900 | 4.99979900  |
| H | 4.30348200   | -5.77626800 | 5.01604400  |
| H | 3.72824400   | -4.32174500 | 5.83207100  |
| H | -8.05402000  | 3.35864400  | 0.06233400  |
| H | 9.49994500   | -0.80201200 | 0.43386200  |
| H | 13.48488300  | 1.97106000  | 2.26946400  |
| H | 14.01865600  | 4.41589100  | 2.45009700  |
| H | 12.58105800  | 6.07806100  | 1.33081300  |
| H | 10.63070400  | 5.39142400  | -0.00136300 |
| H | -13.56959000 | 2.99751500  | -0.09333800 |
| H | -15.10369900 | 1.10209000  | -0.31406300 |
| H | -14.27914100 | -1.22342500 | -0.36209300 |
| H | -11.81315000 | -1.67786200 | -0.19417100 |

## m-ITIC

|     |             |             |             |
|-----|-------------|-------------|-------------|
| 0 1 |             |             |             |
| C   | -1.15301600 | 0.88298000  | -0.06132100 |
| C   | -1.36819000 | -0.51610300 | -0.03340900 |
| C   | -0.30748400 | -1.42707000 | -0.01338200 |
| C   | 0.97615700  | -0.91387100 | -0.03054100 |
| C   | 1.19139400  | 0.48531000  | -0.05119800 |
| C   | 0.13066800  | 1.39636600  | -0.06265600 |
| C   | 2.30344200  | -1.68473200 | -0.00302300 |
| C   | 3.28283000  | -0.52551200 | -0.00272500 |
| C   | 2.61898100  | 0.68461500  | -0.04587000 |
| C   | -2.48063600 | 1.65424000  | -0.06055600 |
| C   | -3.45983900 | 0.49540200  | -0.02130600 |
| C   | -2.79573800 | -0.71529800 | -0.02140400 |
| C   | -4.85340200 | 0.30954200  | -0.02129200 |
| C   | -5.22074500 | -1.05234800 | -0.00991300 |
| S   | -3.82682400 | -2.10417800 | -0.01514000 |
| S   | -6.24257900 | 1.31435700  | -0.01762700 |
| C   | -7.31854600 | -0.09318700 | 0.00563100  |
| C   | -6.59407000 | -1.28619800 | 0.00394400  |
| C   | 4.67625500  | -0.34028100 | -0.01461500 |
| C   | 5.04450000  | 1.02077100  | -0.05533100 |
| S   | 3.65076200  | 2.07227800  | -0.09404600 |
| S   | 6.06482600  | -1.34552700 | 0.01717400  |
| C   | 7.14172300  | 0.06082800  | -0.02010400 |
| C   | 6.41814900  | 1.25370100  | -0.05945100 |
| C   | -2.72932600 | 2.44330400  | -1.35496300 |
| C   | -2.53005400 | 2.53439900  | 1.19414200  |
| C   | 2.35044900  | -2.52649500 | 1.27789000  |
| C   | 2.55430500  | -2.51333600 | -1.27203800 |
| C   | -8.70460300 | 0.19983800  | 0.00376000  |
| C   | 8.52730900  | -0.23365300 | -0.02861800 |
| C   | -9.83313100 | -0.58987200 | 0.05287900  |

|   |              |             |             |
|---|--------------|-------------|-------------|
| C | 9.65651400   | 0.55619000  | -0.01407500 |
| C | 11.02870800  | 0.05154700  | -0.03254100 |
| C | 11.93305600  | 1.20313100  | 0.17513900  |
| C | 11.16097000  | 2.37080300  | 0.24129700  |
| C | 9.73053400   | 2.03237400  | 0.10766000  |
| C | -11.20653100 | -0.08749500 | 0.03873300  |
| C | -12.10781700 | -1.23877500 | 0.26229600  |
| C | -11.33292600 | -2.40347100 | 0.34356100  |
| C | -9.90380800  | -2.06378800 | 0.20136600  |
| C | 13.32053800  | 1.29782200  | 0.29645200  |
| C | 13.88670400  | 2.55974300  | 0.47590300  |
| C | 13.10302300  | 3.71471900  | 0.53198100  |
| C | 11.71815400  | 3.62656300  | 0.41390600  |
| C | -13.49494600 | -1.33563600 | 0.38682400  |
| C | -14.05751500 | -2.59637900 | 0.58475500  |
| C | -13.27075300 | -3.74837700 | 0.65660800  |
| C | -11.88634600 | -3.65812600 | 0.53528600  |
| C | -2.05086000  | 2.13759800  | -2.53609200 |
| C | -2.33449900  | 2.79396900  | -3.73700800 |
| C | -3.33316500  | 3.77060300  | -3.74342400 |
| C | -4.02236300  | 4.08177600  | -2.57601900 |
| C | -3.72477300  | 3.42522300  | -1.38625600 |
| C | -3.08207200  | 2.06576400  | 2.38576700  |
| C | -3.04286100  | 2.85684400  | 3.53257300  |
| C | -2.45229600  | 4.11320600  | 3.50222200  |
| C | -1.88960400  | 4.60441900  | 2.31870800  |
| C | -1.93902400  | 3.80315700  | 1.17824600  |
| C | 1.76461500   | -3.79659700 | 1.30122400  |
| C | 1.72935200   | -4.52686900 | 2.48351200  |
| C | 2.27854600   | -4.00474700 | 3.65121400  |
| C | 2.87233300   | -2.74143400 | 3.65137200  |
| C | 2.89412100   | -2.01503600 | 2.45635000  |
| C | 3.55936000   | -3.48458500 | -1.26975700 |
| C | 3.89303700   | -4.20263200 | -2.42116500 |
| C | 3.18657600   | -3.93681200 | -3.59633500 |
| C | 2.18358000   | -2.97292400 | -3.61398800 |
| C | 1.86800000   | -2.25941300 | -2.46177800 |
| C | -1.56126200  | 2.47209200  | -4.98538300 |
| C | -1.25661600  | 5.96737600  | 2.27970000  |
| C | 3.49940500   | -2.17853800 | 4.89614400  |
| C | 4.99952600   | -5.21934600 | -2.38848500 |
| O | 8.82019700   | 2.84758800  | 0.11468300  |
| O | -8.99202500  | -2.87724800 | 0.21978000  |
| C | 11.45810400  | -1.24314200 | -0.24897700 |
| C | -11.64090000 | 1.20513800  | -0.18022300 |
| C | -13.01393900 | 1.58526100  | -0.16822300 |
| N | -14.11663400 | 1.95679300  | -0.16906500 |
| C | -10.79192700 | 2.31241300  | -0.46786100 |
| N | -10.14992700 | 3.25223400  | -0.71185000 |
| C | 12.83002900  | -1.62719300 | -0.24140600 |
| N | 13.93196000  | -2.00094000 | -0.24502400 |
| C | 10.60314000  | -2.34666600 | -0.53358000 |
| N | 9.95471300   | -3.28234500 | -0.77653000 |
| H | -0.48710700  | -2.49733900 | 0.01830100  |
| H | 0.31035100   | 2.46705100  | -0.06860500 |
| H | -7.08852800  | -2.24856100 | 0.01448300  |
| H | 6.91343100   | 2.21531200  | -0.08779800 |
| H | -8.89596000  | 1.26821200  | -0.03325900 |
| H | 8.71786400   | -1.30281500 | -0.03682300 |
| H | 13.96441400  | 0.42911800  | 0.26096900  |
| H | 14.96475300  | 2.64153600  | 0.57410200  |
| H | 13.57829400  | 4.68088600  | 0.66986900  |
| H | 11.08035300  | 4.50392300  | 0.45509000  |
| H | -14.14152000 | -0.46956500 | 0.33938700  |
| H | -15.13526400 | -2.67957000 | 0.68508800  |
| H | -13.74324800 | -4.71371700 | 0.80907700  |
| H | -11.24596900 | -4.53297700 | 0.58820800  |
| H | -1.28032200  | 1.37157600  | -2.52930000 |
| H | -3.57145300  | 4.28902700  | -4.66880100 |
| H | -4.79915100  | 4.84086000  | -2.59009200 |
| H | -4.25769000  | 3.68908300  | -0.47740500 |
| H | -3.54079600  | 1.08247300  | 2.42522400  |
| H | -3.47984800  | 2.48514200  | 4.45500200  |
| H | -2.42893700  | 4.72400500  | 4.40141800  |
| H | -1.52134400  | 4.18549300  | 0.25015800  |
| H | 1.34833400   | -4.21944700 | 0.39178700  |
| H | 1.27095200   | -5.51167300 | 2.49356700  |
| H | 2.24859300   | -4.58372400 | 4.57079100  |
| H | 3.34380200   | -1.02520200 | 2.45328800  |
| H | 4.08629700   | -3.70599000 | -0.34450100 |
| H | 3.42300200   | -4.49101300 | -4.50111800 |

|   |             |             |             |
|---|-------------|-------------|-------------|
| H | 1.63806000  | -2.77642900 | -4.53265100 |
| H | 1.08362200  | -1.51005000 | -2.49040700 |
| H | -1.17095900 | 1.45105000  | -4.96272800 |
| H | -2.18313700 | 2.58145500  | -5.87822800 |
| H | -0.70493400 | 3.14703300  | -5.10113800 |
| H | -1.98951600 | 6.74939400  | 2.50600400  |
| H | -0.45654600 | 6.05320500  | 3.02257700  |
| H | -0.82961100 | 6.18261000  | 1.29710100  |
| H | 3.06188800  | -2.61788300 | 5.79652200  |
| H | 4.57589000  | -2.38509700 | 4.92000400  |
| H | 3.37654600  | -1.09309700 | 4.94990600  |
| H | 5.98044200  | -4.73013700 | -2.40259400 |
| H | 4.95662900  | -5.82764400 | -1.48008000 |
| H | 4.95216700  | -5.88885800 | -3.25111100 |

## IT-DM

|   |              |             |             |
|---|--------------|-------------|-------------|
| 0 | 1            |             |             |
| C | 1.01917300   | 0.95060700  | 0.05453300  |
| C | 1.30308400   | -0.43625700 | 0.05599100  |
| C | 0.28871600   | -1.39876800 | 0.05125000  |
| C | -1.01906900  | -0.95024900 | 0.05702400  |
| C | -1.30299400  | 0.43660700  | 0.05395300  |
| C | -0.28861900  | 1.39909900  | 0.04668700  |
| C | -2.30707400  | -1.78638500 | 0.04337700  |
| C | -3.34232600  | -0.67642700 | 0.03070000  |
| C | -2.73892600  | 0.56507500  | 0.05062000  |
| C | 2.30722100   | 1.78666700  | 0.03883000  |
| C | 3.34245000   | 0.67665200  | 0.03026200  |
| C | 2.73901000   | -0.56476300 | 0.05383900  |
| C | -2.32296300  | -2.64188500 | -1.22801900 |
| C | -2.50492500  | -2.61459500 | 1.32067100  |
| C | -1.66651300  | -3.87727900 | -1.25484600 |
| C | -1.60430200  | -4.62615400 | -2.42348500 |
| C | -2.19744900  | -4.17505200 | -3.60696800 |
| C | -2.84792500  | -2.94057900 | -3.57580900 |
| C | -2.91030200  | -2.18447700 | -2.40829100 |
| C | -3.43948900  | -3.65527500 | 1.34141800  |
| C | -3.69944800  | -4.35859100 | 2.51216500  |
| C | -3.03644100  | -4.05280500 | 3.70387100  |
| C | -2.10945500  | -3.00848100 | 3.67967200  |
| C | -1.84753600  | -2.29924100 | 2.51134000  |
| C | 2.50446200   | 2.61906900  | 1.31348600  |
| C | 2.32375100   | 2.63811400  | -1.23528000 |
| C | 1.84663800   | 2.30752000  | 2.50492900  |
| C | 2.10807500   | 3.02055300  | 3.67104400  |
| C | 3.03500300   | 4.06501200  | 3.69220500  |
| C | 3.69839800   | 4.36700800  | 2.49976300  |
| C | 3.43889500   | 3.65989900  | 1.33118900  |
| C | 2.91248300   | 2.17750500  | -2.41357600 |
| C | 2.85055700   | 2.92997200  | -3.58350800 |
| C | 2.19918200   | 4.16381100  | -3.61908800 |
| C | 1.60472300   | 4.61819800  | -2.43748200 |
| C | 1.66649400   | 3.87301000  | -1.26650600 |
| C | 3.29204700   | 4.85370200  | 4.94482600  |
| C | 2.16068500   | 4.99065700  | -4.87294600 |
| C | -3.29400400  | -4.83750700 | 4.95888800  |
| C | -2.15877400  | -5.00584200 | -4.85820700 |
| C | -4.74371600  | -0.56001900 | 0.03808000  |
| C | -5.17850200  | 0.78112100  | 0.05500200  |
| S | -3.83856200  | 1.90052400  | 0.07530100  |
| C | 4.74383500   | 0.56022400  | 0.03889300  |
| C | 5.17856500   | -0.78086500 | 0.06047100  |
| S | 3.83858500   | -1.90015300 | 0.08359300  |
| S | -6.08221100  | -1.63213100 | 0.01561100  |
| C | -7.22675800  | -0.27946000 | 0.02507100  |
| C | -6.56241200  | 0.94662300  | 0.04903700  |
| S | 6.08238400   | 1.63222000  | 0.01377900  |
| C | 7.22686700   | 0.27955200  | 0.02824500  |
| C | 6.56247800   | -0.94642300 | 0.05591500  |
| C | -8.59812400  | -0.64163300 | 0.01444900  |
| C | 8.59827900   | 0.64155800  | 0.01743600  |
| C | -9.76432800  | 0.09035900  | 0.00144700  |
| C | 9.76434800   | -0.09066600 | 0.00629800  |
| C | -11.11310300 | -0.48024300 | -0.01340900 |
| C | -12.07030000 | 0.64027000  | -0.09671000 |
| C | -11.35623400 | 1.84267500  | -0.10050300 |
| C | -9.91103600  | 1.56799300  | -0.03330000 |

|   |              |             |             |
|---|--------------|-------------|-------------|
| C | 11.11317300  | 0.47975800  | -0.00939000 |
| C | 12.07008600  | -0.64071200 | -0.09612500 |
| C | 11.35593700  | -1.84307700 | -0.09859900 |
| C | 9.91089600   | -1.56833300 | -0.02803900 |
| C | 13.46256100  | -0.68895800 | -0.16699400 |
| C | 14.11593600  | -1.92277200 | -0.23705000 |
| C | 13.37654900  | -3.12999300 | -0.23421900 |
| C | 11.98398100  | -3.07364700 | -0.16388700 |
| C | -13.46296800 | 0.68851500  | -0.16376000 |
| C | -14.11657600 | 1.92233000  | -0.23157700 |
| C | -13.37722700 | 3.12957300  | -0.23047800 |
| C | -11.98448200 | 3.07324400  | -0.16382100 |
| O | -9.03813000  | 2.42397900  | -0.01669900 |
| O | 9.03799800   | -2.42427500 | -0.00918100 |
| C | -11.48001400 | -1.81109600 | 0.05378300  |
| C | 11.48028800  | 1.81036900  | 0.06113200  |
| C | 14.07818200  | -4.45243800 | -0.30690700 |
| C | -14.07909200 | 4.45201100  | -0.30101900 |
| C | 15.61382600  | -1.95957300 | -0.31600100 |
| C | -15.61468900 | 1.95909400  | -0.30622700 |
| C | 12.83418400  | 2.25276500  | 0.03468100  |
| N | 13.91793200  | 2.67640000  | 0.01698700  |
| C | 10.57610600  | 2.90428500  | 0.18090700  |
| N | 9.88879700   | 3.83848000  | 0.28213900  |
| C | -12.83391600 | -2.25355100 | 0.02843700  |
| N | -13.91762200 | -2.67732500 | 0.01145100  |
| C | -10.57562900 | -2.90546400 | 0.16774200  |
| N | -9.88818100  | -3.84008900 | 0.26396800  |
| H | 0.52159900   | -2.45912900 | 0.04085400  |
| H | -0.52152700  | 2.45941200  | 0.03284000  |
| H | -1.20929800  | -4.26569500 | -0.34906900 |
| H | -1.08713200  | -5.58271500 | -2.41533300 |
| H | -3.31673300  | -2.56024600 | -4.48009800 |
| H | -3.41933800  | -1.22517500 | -2.42352200 |
| H | -3.96106600  | -3.93111500 | 0.42915400  |
| H | -4.43244000  | -5.16152500 | 2.49773300  |
| H | -1.58093900  | -2.74196300 | 4.59189200  |
| H | -1.12292000  | -1.49107100 | 2.53296400  |
| H | 1.12207100   | 1.49937200  | 2.52888700  |
| H | 1.57924900   | 2.75696100  | 4.58393300  |
| H | 4.43134200   | 5.16993900  | 2.48301800  |
| H | 3.96073900   | 3.93283800  | 0.41820600  |
| H | 3.42226100   | 1.21855000  | -2.42542000 |
| H | 3.32047500   | 2.54721000  | -4.48619400 |
| H | 1.08688600   | 5.57442300  | -2.43272500 |
| H | 1.20830300   | 4.26392200  | -0.36230000 |
| H | 3.10892400   | 4.25261700  | 5.83967100  |
| H | 4.32225100   | 5.21857100  | 4.98168800  |
| H | 2.63460500   | 5.72956900  | 4.99967900  |
| H | 2.30373100   | 4.37261600  | -5.76326400 |
| H | 1.20880300   | 5.52032000  | -4.97266100 |
| H | 2.95369000   | 5.74776800  | -4.86817300 |
| H | -4.32500500  | -5.19993200 | 4.99777200  |
| H | -2.63853800  | -5.71474500 | 5.01540900  |
| H | -3.10861700  | -4.23443200 | 5.85191700  |
| H | -1.20931200  | -5.54069100 | -4.95299600 |
| H | -2.95574300  | -5.75879100 | -4.85399100 |
| H | -2.29556500  | -4.38975600 | -5.75087200 |
| H | -7.10516700  | 1.88252500  | 0.05973600  |
| H | 7.10519100   | -1.88230800 | 0.06996400  |
| H | -8.73413500  | -1.71887700 | 0.00973900  |
| H | 8.73447700   | 1.71877200  | 0.01011200  |
| H | 14.06487200  | 0.21053800  | -0.17234700 |
| H | 11.38878300  | -3.98262000 | -0.16075800 |
| H | -14.06529300 | -0.21097300 | -0.16760900 |
| H | -11.38929700 | 3.98222900  | -0.16196600 |
| H | 14.68170100  | -4.53337400 | -1.21812000 |
| H | 14.76388300  | -4.58597300 | 0.53756000  |
| H | 13.36427400  | -5.27850100 | -0.29825400 |
| H | -14.68481700 | 4.53319700  | -1.21074500 |
| H | -14.76274900 | 4.58524900  | 0.54514800  |
| H | -13.36520600 | 5.27810900  | -0.29385500 |
| H | 16.03579500  | -0.95273300 | -0.30862700 |
| H | 16.04268800  | -2.51424700 | 0.52629900  |
| H | 15.95127800  | -2.46303600 | -1.22910700 |
| H | -16.03657400 | 0.95222400  | -0.29821600 |
| H | -16.04116400 | 2.51325900  | 0.53762200  |
| H | -15.95478800 | 2.46306100  | -1.21806800 |

# IT-M

|   |              |             |             |
|---|--------------|-------------|-------------|
| 0 | 1            |             |             |
| C | 1.03402400   | 0.93419700  | 0.01519600  |
| C | 1.29600100   | -0.45703500 | 0.01790900  |
| C | 0.26643500   | -1.40322700 | 0.01368100  |
| C | -1.03394400  | -0.93379700 | 0.01884400  |
| C | -1.29593300  | 0.45743100  | 0.01475000  |
| C | -0.26636100  | 1.40359100  | 0.00681500  |
| C | -2.33482600  | -1.74961600 | 0.00570500  |
| C | -3.35236000  | -0.62352600 | -0.00601900 |
| C | -2.72962500  | 0.60859900  | 0.01239400  |
| C | 2.33493700   | 1.74993100  | -0.00086100 |
| C | 3.35246700   | 0.62378800  | -0.00662500 |
| C | 2.72968800   | -0.60822000 | 0.01731500  |
| C | -2.36398000  | -2.60426200 | -1.26611200 |
| C | -2.54522200  | -2.57531100 | 1.28263000  |
| C | -1.72561100  | -3.84908700 | -1.29328700 |
| C | -1.67408100  | -4.59837600 | -2.46212300 |
| C | -2.26050600  | -4.13827900 | -3.64553200 |
| C | -2.89322800  | -2.89465300 | -3.61390600 |
| C | -2.94470500  | -2.13801900 | -2.44614600 |
| C | -3.49463700  | -3.60241100 | 1.30248600  |
| C | -3.76500200  | -4.30254300 | 2.47286100  |
| C | -3.09813900  | -4.00685800 | 3.66489500  |
| C | -2.15642000  | -2.97568300 | 3.64163000  |
| C | -1.88392600  | -2.26977100 | 2.47376800  |
| C | 2.54443800   | 2.58153900  | 1.27238700  |
| C | 2.36500400   | 2.59881800  | -1.27649300 |
| C | 1.88251300   | 2.28139500  | 2.46453800  |
| C | 2.15430700   | 2.99269000  | 3.62930100  |
| C | 3.09590700   | 4.02404800  | 3.64835100  |
| C | 3.76334700   | 4.31438800  | 2.45531500  |
| C | 3.49367100   | 3.60888200  | 1.28802300  |
| C | 2.94758700   | 2.12783800  | -2.45371900 |
| C | 2.89683800   | 2.87923700  | -3.62490400 |
| C | 2.26304000   | 4.12212600  | -3.66285900 |
| C | 1.67485200   | 4.58702300  | -2.48219300 |
| C | 1.72568000   | 3.84300600  | -1.30997900 |
| C | 3.36390800   | 4.81143500  | 4.89948500  |
| C | 2.23638100   | 4.94720800  | -4.91817200 |
| C | -3.36680300  | -4.78853400 | 4.91946600  |
| C | -2.23325500  | -4.96903900 | -4.89707800 |
| C | -4.75144800  | -0.48525400 | 0.00542000  |
| C | -5.16539400  | 0.86280600  | 0.02332000  |
| S | -3.80795800  | 1.96130900  | 0.03933500  |
| C | 4.75154900   | 0.48552600  | 0.00653100  |
| C | 5.16542500   | -0.86244200 | 0.03139200  |
| S | 3.80795000   | -1.96081400 | 0.05180100  |
| S | -6.10573700  | -1.53683000 | -0.01083500 |
| C | -7.22962100  | -0.16688500 | 0.00347700  |
| C | -6.54629000  | 1.04946000  | 0.02302800  |
| S | 6.10590200   | 1.53695700  | -0.01405800 |
| C | 7.22970800   | 0.16704200  | 0.00766300  |
| C | 6.54631100   | -1.04915200 | 0.03293800  |
| C | -8.60529300  | -0.50912900 | 0.00139600  |
| C | 8.60542900   | 0.50908100  | 0.00497900  |
| C | -9.76193200  | 0.23918300  | 0.00258500  |
| C | 9.76188400   | -0.23950600 | 0.00887200  |
| C | -11.11848400 | -0.31205400 | 0.00020700  |
| C | -12.06182600 | 0.82237400  | -0.03916700 |
| C | -11.33169400 | 2.01678900  | -0.04118500 |
| C | -9.88713300  | 1.71736700  | -0.01283900 |
| C | 11.11851500  | 0.31148400  | 0.00504900  |
| C | 12.06156400  | -0.82295900 | -0.03977300 |
| C | 11.33128400  | -2.01729400 | -0.03973700 |
| C | 9.88685500   | -1.71772400 | -0.00607900 |
| C | 13.45653900  | -0.89337300 | -0.07950200 |
| C | 14.05942300  | -2.14689600 | -0.11437400 |
| C | 13.32476200  | -3.34402300 | -0.10835100 |
| C | 11.93016300  | -3.26402800 | -0.07274900 |
| C | -13.45697400 | 0.89269700  | -0.07280000 |
| C | -14.06013200 | 2.14617300  | -0.10413800 |
| C | -13.32556500 | 3.34337400  | -0.10060100 |
| C | -11.93083300 | 3.26348800  | -0.07094800 |
| O | -9.00309900  | 2.56140700  | -0.00734400 |
| O | 9.00276700   | -2.56167500 | 0.00276100  |
| C | -11.50425700 | -1.63860300 | 0.03921000  |
| C | 11.50453900  | 1.63778200  | 0.04918700  |
| C | 14.02968200  | -4.66764100 | -0.12396300 |



|   |              |             |             |
|---|--------------|-------------|-------------|
| C | -14.03071300 | 4.66691100  | -0.11244900 |
| C | 12.86579800  | 2.05766800  | 0.03942700  |
| N | 13.95712900  | 2.46161300  | 0.03348800  |
| C | 10.61527400  | 2.74810100  | 0.11867400  |
| N | 9.94003500   | 3.69459800  | 0.17795100  |
| C | -12.86548700 | -2.05863500 | 0.03167500  |
| N | -13.95674400 | -2.46280500 | 0.02733400  |
| C | -10.61476600 | -2.74929900 | 0.09915800  |
| N | -9.93938800  | -3.69617700 | 0.15026000  |
| H | 0.48203200   | -2.46718100 | 0.00454500  |
| H | -0.48198500  | 2.46747900  | -0.00753500 |
| H | -1.27430000  | -4.24438800 | -0.38754900 |
| H | -1.17078800  | -5.56230600 | -2.45423000 |
| H | -3.35654600  | -2.50735900 | -4.51806500 |
| H | -3.43975900  | -1.17140700 | -2.46125200 |
| H | -4.01974200  | -3.87039600 | 0.38989000  |
| H | -4.50925700  | -5.09502400 | 2.45779300  |
| H | -1.62456300  | -2.71715700 | 4.55420300  |
| H | -1.14782900  | -1.47204400 | 2.49606600  |
| H | 1.14648600   | 1.48370100  | 2.49009500  |
| H | 1.62199200   | 2.73830700  | 4.54276800  |
| H | 4.50751500   | 5.10688300  | 2.43702900  |
| H | 4.01915000   | 3.87278000  | 0.37445700  |
| H | 3.44352500   | 1.16161800  | -2.46392900 |
| H | 3.36160600   | 2.48835500  | -4.52677300 |
| H | 1.17074300   | 5.55055500  | -2.47917400 |
| H | 1.27304700   | 4.24197300  | -0.40651500 |
| H | 3.17982400   | 4.21223200  | 5.79541300  |
| H | 4.39691500   | 5.16863000  | 4.93203600  |
| H | 2.71311000   | 5.69210700  | 4.95647100  |
| H | 2.37107400   | 4.32571600  | -5.80737700 |
| H | 1.29194700   | 5.48981400  | -5.01905800 |
| H | 3.03977100   | 5.69329100  | -4.91443300 |
| H | -4.39937900  | -5.14692400 | 4.95236700  |
| H | -2.71490300  | -5.66804200 | 4.98158000  |
| H | -3.18469700  | -4.18477200 | 5.81273700  |
| H | -1.28970700  | -5.51391500 | -4.99389400 |
| H | -3.03810400  | -5.71353800 | -4.89137900 |
| H | -2.36524100  | -4.35130000 | -5.78930100 |
| H | -7.07391700  | 1.99391100  | 0.03572100  |
| H | 7.07387800   | -1.99355900 | 0.05058400  |
| H | -8.75670000  | -1.58432900 | -0.00528300 |
| H | 8.75709200   | 1.58422100  | -0.00582400 |
| H | 14.08038500  | -0.00946400 | -0.08806400 |
| H | 15.14438300  | -2.20066800 | -0.14893600 |
| H | 11.31356400  | -4.15856500 | -0.07219300 |
| H | -14.08078900 | 0.00875200  | -0.07902300 |
| H | -15.14524200 | 2.19985300  | -0.13379700 |
| H | -11.31433400 | 4.15809100  | -0.07240700 |
| H | 14.48700900  | -4.87257300 | 0.85074200  |
| H | 13.34050200  | -5.48485600 | -0.34769500 |
| H | 14.83370800  | -4.67911900 | -0.86569200 |
| H | -14.83639400 | 4.67948100  | -0.85237100 |
| H | -14.48593600 | 4.87015900  | 0.86359200  |
| H | -13.34217100 | 5.48460100  | -0.33639700 |

## ITCPTC

|     |             |             |             |
|-----|-------------|-------------|-------------|
| 0 1 |             |             |             |
| C   | -1.27988400 | -0.50047900 | 0.06082800  |
| C   | -1.06424400 | 0.89894800  | 0.06401300  |
| C   | -0.21939300 | -1.41201700 | 0.05738300  |
| C   | 1.06425600  | -0.89893000 | 0.06414400  |
| C   | 1.27989600  | 0.50049900  | 0.06073400  |
| C   | 0.21940500  | 1.41203700  | 0.05715200  |
| C   | 2.39103700  | -1.67133700 | 0.04688900  |
| C   | 3.37053600  | -0.51232700 | 0.02368400  |
| C   | 2.70740400  | 0.69904600  | 0.04811700  |
| C   | 4.76359300  | -0.32761100 | 0.01857200  |
| C   | 5.13266400  | 1.03438900  | 0.02981600  |
| S   | 3.73956300  | 2.08718800  | 0.06110400  |
| S   | 6.15080200  | -1.33422000 | -0.01530400 |
| C   | 7.22892600  | 0.07242200  | -0.01817800 |
| C   | 6.50551000  | 1.26672100  | 0.01000800  |
| C   | -2.39102400 | 1.67135300  | 0.04665500  |
| C   | -3.37052500 | 0.51233600  | 0.02361900  |
| C   | -2.70739100 | -0.69903100 | 0.04824100  |

|   |              |             |             |
|---|--------------|-------------|-------------|
| C | -4.76358300  | 0.32761700  | 0.01857500  |
| C | -5.13265000  | -1.03438300 | 0.03006100  |
| S | -3.73954400  | -2.08717500 | 0.06149500  |
| S | -6.15079400  | 1.33421200  | -0.01547700 |
| C | -7.22891600  | -0.07243200 | -0.01810400 |
| C | -6.50549500  | -1.26672100 | 0.01028900  |
| C | -2.63689500  | 2.48134800  | 1.32748100  |
| C | -2.44014700  | 2.53227200  | -1.22017200 |
| C | 2.63690600   | -2.48115300 | 1.32783300  |
| C | 2.44016500   | -2.53245300 | -1.21979800 |
| C | -3.62709600  | 3.46918900  | 1.34965200  |
| C | -3.92692900  | 4.15364700  | 2.52213400  |
| C | -3.25037400  | 3.88063900  | 3.71409000  |
| C | -2.26826800  | 2.88786300  | 3.68866000  |
| C | -1.96576700  | 2.19799900  | 2.51862800  |
| C | -1.85602700  | 3.80326000  | -1.23171000 |
| C | -1.82058600  | 4.56083800  | -2.39613800 |
| C | -2.36972200  | 4.08270200  | -3.58988100 |
| C | -2.94788600  | 2.81212000  | -3.57382000 |
| C | -2.98287400  | 2.04747800  | -2.41104900 |
| C | 3.62705000   | -3.46906300 | 1.35010500  |
| C | 3.92688400   | -4.15336900 | 2.52266400  |
| C | 3.25038800   | -3.88014100 | 3.71461700  |
| C | 2.26835500   | -2.88731200 | 3.68908200  |
| C | 1.96584800   | -2.19759000 | 2.51895500  |
| C | 1.85580000   | -3.80335900 | -1.23118300 |
| C | 1.82034300   | -4.56112300 | -2.39545800 |
| C | 2.36973000   | -4.08329100 | -3.58923800 |
| C | 2.94816900   | -2.81286300 | -3.57332000 |
| C | 2.98314900   | -2.04799400 | -2.41066600 |
| C | -3.55058400  | 4.64687000  | 4.97101500  |
| C | -2.36280800  | 4.92077900  | -4.83677200 |
| C | 3.55064100   | -4.64624700 | 4.97160800  |
| C | 2.36260400   | -4.92165700 | -4.83593400 |
| C | 8.61298700   | -0.22250700 | -0.04668700 |
| C | -8.61297700  | 0.22249000  | -0.04659300 |
| C | 9.74872100   | 0.56053200  | -0.05514900 |
| C | -9.74872400  | -0.56053400 | -0.05497500 |
| C | 11.11077600  | 0.02294800  | -0.08892500 |
| C | 12.02308300  | 1.16721100  | -0.07429800 |
| C | 11.26469800  | 2.37193400  | -0.03762600 |
| C | 9.82899000   | 2.05089700  | -0.02612500 |
| C | -11.11076900 | -0.02291900 | -0.08875500 |
| C | -12.02309900 | -1.16716500 | -0.07433300 |
| C | -11.26474100 | -2.37190500 | -0.03767200 |
| C | -9.82902700  | -2.05089900 | -0.02598900 |
| C | 13.37504500  | 1.39705500  | -0.08685000 |
| S | 13.69148200  | 3.08834600  | -0.05316400 |
| C | 12.02123400  | 3.50401900  | -0.02240700 |
| C | -13.37506400 | -1.39698500 | -0.08705600 |
| S | -13.69153400 | -3.08827400 | -0.05354400 |
| C | -12.02129700 | -3.50397900 | -0.02262600 |
| O | 8.91312200   | 2.85821000  | 0.00204100  |
| O | -8.91318100  | -2.85823100 | 0.00227000  |
| C | -11.54514500 | 1.28858300  | -0.13016600 |
| C | 11.54517400  | -1.28853900 | -0.13055000 |
| C | -10.70652300 | 2.43652000  | -0.15213200 |
| N | -10.05868300 | 3.40369300  | -0.17170900 |
| C | -12.93446900 | 1.59510200  | -0.15701900 |
| N | -14.06838600 | 1.85616600  | -0.17908200 |
| C | 10.70656200  | -2.43647400 | -0.15285900 |
| N | 10.05872100  | -3.40364100 | -0.17273900 |
| C | 12.93450400  | -1.59503400 | -0.15732700 |
| N | 14.06843600  | -1.85603800 | -0.17936200 |
| H | -0.39923200  | -2.48266600 | 0.04444700  |
| H | 0.39923700   | 2.48268600  | 0.04400200  |
| H | 7.00198700   | 2.22810700  | 0.01450100  |
| H | -7.00196100  | -2.22811200 | 0.01493900  |
| H | -4.16151500  | 3.71955300  | 0.43738700  |
| H | -4.70213900  | 4.91587600  | 2.50877500  |
| H | -1.72779700  | 2.64741800  | 4.60110200  |
| H | -1.19798200  | 1.43070400  | 2.53932100  |
| H | -1.43492000  | 4.21203000  | -0.31753200 |
| H | -1.35970900  | 5.54554200  | -2.37610600 |
| H | -3.38055500  | 2.40997900  | -4.48665900 |
| H | -3.43407300  | 1.05980500  | -2.43845500 |
| H | 4.16141600   | -3.71958400 | 0.43785100  |
| H | 4.70204400   | -4.91565200 | 2.50938200  |
| H | 1.72793400   | -2.64670400 | 4.60151000  |
| H | 1.19811200   | -1.43024400 | 2.53957200  |
| H | 1.43452500   | -4.21189100 | -0.31697400 |

|   |              |             |             |
|---|--------------|-------------|-------------|
| H | 1.35926900   | -5.54573500 | -2.37530300 |
| H | 3.38107900   | -2.41100200 | -4.48616400 |
| H | 3.43456100   | -1.06042300 | -2.43819900 |
| H | -2.91832200  | 5.53949900  | 5.04695800  |
| H | -4.59094600  | 4.98256600  | 4.99455700  |
| H | -3.36547500  | 4.04065400  | 5.86206000  |
| H | -1.46855400  | 5.54810400  | -4.89104600 |
| H | -2.40111400  | 4.29970900  | -5.73572700 |
| H | -3.23100200  | 5.58985600  | -4.86411700 |
| H | 2.92011700   | -5.54019800 | 5.04643500  |
| H | 4.59165200   | -4.97986900 | 4.99624900  |
| H | 3.36326900   | -4.04074800 | 5.86266000  |
| H | 1.46461000   | -5.54334400 | -4.89366700 |
| H | 2.40843000   | -4.30111000 | -5.73487700 |
| H | 3.22657300   | -5.59631400 | -4.85952500 |
| H | 8.80264600   | -1.29216400 | -0.06614000 |
| H | -8.80263200  | 1.29214700  | -0.06613900 |
| H | 14.20052000  | 0.70044600  | -0.11285700 |
| H | 11.70687500  | 4.53838900  | 0.00429100  |
| H | -14.20052500 | -0.70036100 | -0.11310400 |
| H | -11.70695900 | -4.53835600 | 0.00402800  |

## C8-ITIC

|     |              |             |             |
|-----|--------------|-------------|-------------|
| 0 1 |              |             |             |
| C   | 1.21429500   | -0.64597900 | 0.02263400  |
| C   | 1.16182100   | 0.77114500  | 0.02265200  |
| C   | -0.05461700  | 1.42901800  | 0.02268200  |
| C   | -1.21429600  | 0.64595900  | 0.02243200  |
| C   | -1.16182200  | -0.77116500 | 0.02274000  |
| C   | 0.05461600   | -1.42903900 | 0.02297500  |
| C   | 2.61116600   | -1.00273500 | 0.02094600  |
| C   | 3.40434100   | 0.12918700  | 0.01997700  |
| C   | 2.55970000   | 1.38078800  | 0.02136100  |
| C   | -2.61116700  | 1.00271500  | 0.02060000  |
| C   | -3.40434200  | -0.12920800 | 0.01981400  |
| C   | -2.55970200  | -1.38080900 | 0.02148600  |
| S   | -3.48938600  | 2.49659900  | 0.01717500  |
| C   | -4.98576700  | 1.59625100  | 0.01404600  |
| C   | -4.76928900  | 0.20434600  | 0.01603200  |
| C   | -6.33071500  | 1.94467300  | 0.00857000  |
| C   | -7.17772200  | 0.82706000  | 0.00667600  |
| S   | -6.25199400  | -0.67803700 | 0.01298800  |
| S   | 3.48938500   | -2.49662000 | 0.01782600  |
| C   | 4.98576600   | -1.59627400 | 0.01456700  |
| C   | 4.76928800   | -0.20436800 | 0.01629400  |
| C   | 6.33071400   | -1.94469700 | 0.00917300  |
| C   | 7.17772100   | -0.82708500 | 0.00708700  |
| S   | 6.25199400   | 0.67801300  | 0.01311400  |
| C   | 2.80157800   | 2.22181400  | -1.24116200 |
| C   | 2.80457000   | 2.22122000  | 1.28369700  |
| C   | -2.80149700  | -2.22207800 | -1.24089200 |
| C   | -2.80465300  | -2.22099800 | 1.28396700  |
| C   | 8.57950600   | -1.01466400 | -0.00386300 |
| C   | -8.57950700  | 1.01464200  | -0.00431400 |
| C   | 9.65913600   | -0.16029700 | -0.00868500 |
| C   | -9.65914600  | 0.16028400  | -0.00900300 |
| C   | 11.06650500  | -0.54077000 | -0.02396700 |
| C   | 11.86256000  | 0.70756200  | -0.00544100 |
| C   | 10.98540800  | 1.80210300  | 0.01327000  |
| C   | 9.59376600   | 1.31350000  | 0.00993200  |
| C   | -11.06650600 | 0.54078200  | -0.02434700 |
| C   | -11.86258700 | -0.70753200 | -0.00568700 |
| C   | -10.98545500 | -1.80208700 | 0.01318800  |
| C   | -9.59380300  | -1.31351100 | 0.00982000  |
| C   | 13.23857200  | 0.94088400  | -0.00520800 |
| C   | 13.68928700  | 2.26096600  | 0.01393600  |
| C   | 12.80206800  | 3.33934200  | 0.03209600  |
| C   | 11.42738100  | 3.11393700  | 0.03183200  |
| C   | -13.23860300 | -0.94083100 | -0.00546200 |
| C   | -13.68934100 | -2.26090300 | 0.01383800  |
| C   | -12.80214200 | -3.33929300 | 0.03216100  |
| C   | -11.42745100 | -3.11391100 | 0.03190600  |
| O   | 8.59099500   | 2.01234300  | 0.02222300  |
| C   | 11.60851400  | -1.81133100 | -0.05551500 |
| O   | -8.59104700  | -2.01237200 | 0.02223000  |
| C   | -11.60847000 | 1.81135800  | -0.05603300 |
| C   | 13.00880300  | -2.07109900 | -0.06586300 |
| N   | 14.13984300  | -2.34479800 | -0.07525200 |

|   |              |             |             |
|---|--------------|-------------|-------------|
| C | 10.84523100  | -3.01321800 | -0.08418100 |
| N | 10.26878400  | -4.02431500 | -0.10920100 |
| C | -13.00874700 | 2.07118700  | -0.06641900 |
| N | -14.13977300 | 2.34494200  | -0.07584500 |
| C | -10.84513100 | 3.01320600  | -0.08480200 |
| N | -10.26861300 | 4.02426100  | -0.10990200 |
| H | -0.11212100  | 2.51427700  | 0.02228800  |
| H | 0.11211900   | -2.51429800 | 0.02280500  |
| H | -6.71734200  | 2.95743500  | 0.00467000  |
| H | 6.71734100   | -2.95746100 | 0.00545700  |
| H | 2.13524200   | 3.08964700  | -1.25445100 |
| H | 3.83252200   | 2.58895200  | -1.26455400 |
| H | 2.62341900   | 1.63450900  | -2.14586200 |
| H | 2.62853300   | 1.63351100  | 2.18855200  |
| H | 3.83561300   | 2.58825500  | 1.30476000  |
| H | 2.13830800   | 3.08907800  | 1.29895700  |
| H | -2.13515200  | -3.08990700 | -1.25397500 |
| H | -3.83243500  | -2.58923100 | -1.26427700 |
| H | -2.62328800  | -1.63494500 | -2.14569300 |
| H | -2.62866500  | -1.63311700 | 2.18872000  |
| H | -3.83570200  | -2.58801700 | 1.30503700  |
| H | -2.13840000  | -3.08885900 | 1.29943300  |
| H | 8.81556700   | -2.07421500 | -0.00922500 |
| H | -8.81556300  | 2.07419400  | -0.00985500 |
| H | 13.96113700  | 0.13575800  | -0.01870800 |
| H | 14.75829100  | 2.44993200  | 0.01464800  |
| H | 13.18838700  | 4.35364200  | 0.04645700  |
| H | 10.71193900  | 3.93014600  | 0.04569000  |
| H | -13.96115500 | -0.13569600 | -0.01908600 |
| H | -14.75834900 | -2.44985000 | 0.01454300  |
| H | -13.18848000 | -4.35358400 | 0.04664000  |
| H | -10.71202300 | -3.93013000 | 0.04588800  |

## CI-TIC

|     |             |             |             |
|-----|-------------|-------------|-------------|
| 0 1 |             |             |             |
| C   | -0.09044500 | -1.42532800 | 0.04642500  |
| C   | 1.14148100  | -0.76424300 | 0.01254700  |
| C   | 1.23357000  | 0.64784000  | -0.03683400 |
| C   | 0.09044900  | 1.42531700  | -0.04676900 |
| C   | -1.14147800 | 0.76423100  | -0.01289700 |
| C   | -1.23356700 | -0.64785200 | 0.03648800  |
| C   | -2.49222200 | 1.26583900  | -0.02546400 |
| C   | -3.40324400 | 0.22762300  | -0.00645800 |
| C   | -2.69592800 | -1.11467900 | 0.05301900  |
| C   | 2.49222500  | -1.26584900 | 0.02512800  |
| C   | 3.40324600  | -0.22763200 | 0.00613400  |
| C   | 2.69592900  | 1.11466900  | -0.05335300 |
| C   | -2.94688900 | -1.98442800 | -1.18384200 |
| C   | -3.09393100 | -1.80945600 | 1.36259800  |
| C   | 2.94688900  | 1.98444300  | 1.18348600  |
| C   | 3.09393100  | 1.80942600  | -1.36295000 |
| C   | -2.66051200 | -3.35333200 | -1.15707600 |
| C   | -2.80859500 | -4.13473500 | -2.29690200 |
| C   | -3.25098300 | -3.58277000 | -3.50292600 |
| C   | -3.53045400 | -2.21506800 | -3.52548000 |
| C   | -3.38060900 | -1.42729500 | -2.38788800 |
| C   | -2.35982900 | -1.64381000 | 2.53829100  |
| C   | -2.79137800 | -2.21166900 | 3.73364800  |
| C   | -3.96863900 | -2.95959900 | 3.80030000  |
| C   | -4.70550400 | -3.11452800 | 2.62263800  |
| C   | -4.27780000 | -2.55256200 | 1.42553400  |
| C   | 2.66052400  | 3.35334300  | 1.15669700  |
| C   | 2.80861300  | 4.13476800  | 2.29651600  |
| C   | 3.25099600  | 3.58282300  | 3.50254400  |
| C   | 3.53044900  | 2.21511200  | 3.52512400  |
| C   | 3.38059800  | 1.42732400  | 2.38755100  |
| C   | 4.27780800  | 2.55249000  | -1.42591500 |
| C   | 4.70549800  | 3.11445600  | -2.62304000 |
| C   | 3.96860200  | 2.95956200  | -3.80066800 |
| C   | 2.79131600  | 2.21164300  | -3.73399100 |
| C   | 2.35979100  | 1.64379400  | -2.53863700 |
| S   | -3.19808200 | 2.84544800  | -0.05481500 |
| C   | -4.78372400 | 2.11544800  | -0.04744100 |
| C   | -4.72526200 | 0.70799000  | -0.01484100 |
| C   | -6.07989900 | 2.61371800  | -0.07174800 |
| C   | -7.04586500 | 1.59722500  | -0.05991700 |
| S   | -6.29637400 | -0.00143400 | -0.01446600 |

|    |              |             |             |
|----|--------------|-------------|-------------|
| S  | 3.19808700   | -2.84545900 | 0.05453900  |
| C  | 4.78372900   | -2.11545300 | 0.04722300  |
| C  | 4.72526500   | -0.70799600 | 0.01457900  |
| C  | 6.07990300   | -2.61372000 | 0.07160200  |
| C  | 7.04587000   | -1.59722700 | 0.05978900  |
| S  | 6.29637800   | 0.00143200  | 0.01424500  |
| C  | -8.41660500  | 1.94382700  | -0.08060500 |
| C  | 8.41660800   | -1.94382800 | 0.08058100  |
| C  | -9.58747300  | 1.21879600  | -0.07494500 |
| C  | 9.58747800   | -1.21880000 | 0.07500100  |
| C  | -10.94198700 | 1.75848000  | -0.09871800 |
| C  | -11.87551100 | 0.61107000  | -0.07338700 |
| C  | -11.13149300 | -0.57565900 | -0.03992900 |
| C  | -9.68950100  | -0.25100800 | -0.04027500 |
| C  | 10.94199100  | -1.75848000 | 0.09895600  |
| C  | 11.87551300  | -0.61106100 | 0.07403400  |
| C  | 11.13149800  | 0.57566600  | 0.04046300  |
| C  | 9.68950800   | 0.25100700  | 0.04041200  |
| C  | -13.26935600 | 0.53242100  | -0.07797000 |
| C  | -13.87255800 | -0.72225200 | -0.04943600 |
| C  | -13.10013800 | -1.88537200 | -0.01700200 |
| C  | -11.70922300 | -1.83114600 | -0.01163500 |
| C  | 13.26935600  | -0.53240300 | 0.07907900  |
| C  | 13.87255900  | 0.72227700  | 0.05085200  |
| C  | 13.10014200  | 1.88539400  | 0.01826500  |
| C  | 11.70922900  | 1.83116000  | 0.01245800  |
| O  | -8.77846200  | -1.06352900 | -0.01637500 |
| O  | 8.77847100   | 1.06352500  | 0.01631500  |
| C  | 11.33642500  | -3.08168400 | 0.13956800  |
| C  | -11.33641000 | 3.08167900  | -0.13959100 |
| C  | -4.41569300  | -3.59789100 | 5.08478300  |
| C  | -3.44677000  | -4.43808900 | -4.72244100 |
| C  | 3.44682400   | 4.43813800  | 4.72205600  |
| C  | 4.41554600   | 3.59788300  | -5.08517500 |
| Cl | -13.89384600 | -3.42637100 | 0.01733200  |
| Cl | 13.89384900  | 3.42640100  | -0.01569000 |
| C  | 12.69930800  | -3.49433800 | 0.15906600  |
| N  | 13.79510200  | -3.88550000 | 0.17641500  |
| C  | 10.44120700  | -4.18876000 | 0.16881500  |
| N  | 9.75129900   | -5.12595000 | 0.19452700  |
| C  | -12.69928900 | 3.49435600  | -0.15888000 |
| N  | -13.79507400 | 3.88555000  | -0.17603800 |
| C  | -10.44117400 | 4.18872600  | -0.16938300 |
| N  | -9.75124300  | 5.12588600  | -0.19555900 |
| H  | -0.14457000  | -2.50931900 | 0.07781100  |
| H  | 0.14457500   | 2.50930800  | -0.07814700 |
| H  | -2.33121800  | -3.81835600 | -0.23213300 |
| H  | -2.57904600  | -5.19646800 | -2.24714500 |
| H  | -3.87341200  | -1.75463000 | -4.44887300 |
| H  | -3.60189400  | -0.36540300 | -2.44408500 |
| H  | -1.44170700  | -1.06449300 | 2.52849600  |
| H  | -2.19817500  | -2.06731800 | 4.63348300  |
| H  | -5.63107600  | -3.68481600 | 2.64033500  |
| H  | -4.86827100  | -2.70610000 | 0.52661900  |
| H  | 2.33123600   | 3.81835700  | 0.23174800  |
| H  | 2.57907400   | 5.19650200  | 2.24674000  |
| H  | 3.87339600   | 1.75468900  | 4.44853000  |
| H  | 3.60186600   | 0.36543100  | 2.44376400  |
| H  | 4.86831200   | 2.70601600  | -0.52701900 |
| H  | 5.63108200   | 3.68472300  | -2.64075300 |
| H  | 2.19809300   | 2.06730100  | -4.63381500 |
| H  | 1.44165500   | 1.06449900  | -2.52881300 |
| H  | -6.35010400  | 3.66332400  | -0.09693600 |
| H  | 6.35010800   | -3.66332500 | 0.09683200  |
| H  | -8.52978400  | 3.02312200  | -0.10646000 |
| H  | 8.52978200   | -3.02312200 | 0.10649000  |
| H  | -13.90015000 | 1.41108700  | -0.10253000 |
| H  | -14.95410200 | -0.80054600 | -0.05233400 |
| H  | -11.09786800 | -2.72657900 | 0.01344400  |
| H  | 13.90014600  | -1.41106800 | 0.10377800  |
| H  | 14.95410100  | 0.80057800  | 0.05411500  |
| H  | 11.09787500  | 2.72659100  | -0.01272900 |
| H  | -4.06436500  | -4.63444200 | 5.15135300  |
| H  | -4.02298400  | -3.06361700 | 5.95406400  |
| H  | -5.50652500  | -3.62047800 | 5.16032900  |
| H  | -2.72672700  | -5.26069600 | -4.75351200 |
| H  | -4.44891200  | -4.88285200 | -4.73259600 |
| H  | -3.34015200  | -3.85436000 | -5.64079700 |
| H  | 2.72750900   | 5.26139800  | 4.75258900  |
| H  | 3.33913900   | 3.85462700  | 5.64042900  |
| H  | 4.44937000   | 4.88197800  | 4.73275700  |

|   |            |            |             |
|---|------------|------------|-------------|
| H | 5.50639000 | 3.62250500 | -5.15981100 |
| H | 4.02459300 | 3.06230900 | -5.95445400 |
| H | 4.06225400 | 4.63370400 | -5.15272600 |

## Br-ITIC

|     |              |             |             |
|-----|--------------|-------------|-------------|
| 0 1 |              |             |             |
| C   | -0.15391100  | -1.41930700 | 0.05902700  |
| C   | 1.10631100   | -0.81437900 | 0.01680100  |
| C   | 1.26123500   | 0.59173900  | -0.04482200 |
| C   | 0.15391900   | 1.41929300  | -0.05961200 |
| C   | -1.10630400  | 0.81436500  | -0.01737700 |
| C   | -1.26122700  | -0.59175300 | 0.04423500  |
| C   | -2.43335200  | 1.37569700  | -0.03132300 |
| C   | -3.38965400  | 0.37936800  | -0.00155700 |
| C   | -2.74289500  | -0.99257300 | 0.06765700  |
| C   | 2.43335900   | -1.37570800 | 0.03079400  |
| C   | 3.38966300   | -0.37938000 | 0.00103100  |
| C   | 2.74290100   | 0.99255800  | -0.06823800 |
| C   | -3.03558600  | -1.86116700 | -1.16069500 |
| C   | -3.16834100  | -1.65741300 | 1.38418900  |
| C   | 3.03558800   | 1.86121000  | 1.16007200  |
| C   | 3.16834800   | 1.65734400  | -1.38479900 |
| C   | -2.80518100  | -3.24039000 | -1.12298100 |
| C   | -2.99118200  | -4.02515000 | -2.25483300 |
| C   | -3.41737400  | -3.46615800 | -3.46353600 |
| C   | -3.64110900  | -2.08850000 | -3.49700700 |
| C   | -3.45310400  | -1.29740000 | -2.36729400 |
| C   | -2.42618400  | -1.51154200 | 2.55744600  |
| C   | -2.87933700  | -2.04933200 | 3.75868700  |
| C   | -4.08656200  | -2.74698400 | 3.83370900  |
| C   | -4.83111800  | -2.88193700 | 2.65840700  |
| C   | -4.38228600  | -2.34949100 | 1.45553700  |
| C   | 2.80523700   | 3.24044800  | 1.12227200  |
| C   | 2.99124100   | 4.02526300  | 2.25407600  |
| C   | 3.41738000   | 3.46631900  | 3.46283100  |
| C   | 3.64105600   | 2.08866300  | 3.49638700  |
| C   | 3.45304900   | 1.29750000  | 2.36670800  |
| C   | 4.38232100   | 2.34936100  | -1.45618700 |
| C   | 4.83114800   | 2.88177400  | -2.65907700 |
| C   | 4.08655200   | 2.74684900  | -3.83435300 |
| C   | 2.87929300   | 2.04925200  | -3.75929100 |
| C   | 2.42614900   | 1.51149600  | -2.55803500 |
| S   | -3.06839600  | 2.98480300  | -0.07333400 |
| C   | -4.68499500  | 2.32630300  | -0.05649200 |
| C   | -4.68902100  | 0.91806700  | -0.01160800 |
| C   | -5.95790700  | 2.88158100  | -0.08289600 |
| C   | -6.96803900  | 1.90902200  | -0.06111100 |
| S   | -6.28978900  | 0.27902400  | -0.00279900 |
| S   | 3.06839800   | -2.98481400 | 0.07289200  |
| C   | 4.68500000   | -2.32631500 | 0.05609600  |
| C   | 4.68902900   | -0.91808100 | 0.01114500  |
| C   | 5.95790800   | -2.88159300 | 0.08264100  |
| C   | 6.96804300   | -1.90903700 | 0.06088900  |
| S   | 6.28979800   | -0.27904100 | 0.00242900  |
| C   | -8.32243300  | 2.31492800  | -0.08296600 |
| C   | 8.32243600   | -2.31494200 | 0.08286300  |
| C   | -9.52346700  | 1.64086000  | -0.07284100 |
| C   | 9.52347000   | -1.64087400 | 0.07283400  |
| C   | -10.85364300 | 2.23782600  | -0.10062900 |
| C   | -11.83533700 | 1.13114500  | -0.08146000 |
| C   | -11.14247300 | -0.08616000 | -0.04294400 |
| C   | -9.68816000  | 0.17672300  | -0.03514400 |
| C   | 10.85364300  | -2.23783800 | 0.10082000  |
| C   | 11.83533400  | -1.13114600 | 0.08219600  |
| C   | 11.14247400  | 0.08615800  | 0.04358900  |
| C   | 9.68816600   | -0.17673300 | 0.03529300  |
| C   | -13.23131100 | 1.11224200  | -0.09512700 |
| C   | -13.88701500 | -0.11613500 | -0.07033400 |
| C   | -13.16551100 | -1.31052300 | -0.03245200 |
| C   | -11.77421600 | -1.31560200 | -0.01790700 |
| C   | 13.23130200  | -1.11223500 | 0.09641500  |
| C   | 13.88700600  | 0.11615000  | 0.07203900  |
| C   | 13.16550700  | 1.31053700  | 0.03402100  |
| C   | 11.77421800  | 1.31560800  | 0.01894500  |
| O   | -8.81264400  | -0.67369500 | -0.00422200 |
| O   | 8.81265500   | 0.67368200  | 0.00416800  |
| C   | 11.19139800  | -3.57677700 | 0.13745800  |
| C   | -11.19139300 | 3.57675600  | -0.13764700 |

|    |              |             |             |
|----|--------------|-------------|-------------|
| C  | -4.55811300  | -3.35394200 | 5.12459500  |
| C  | -3.65471200  | -4.32366600 | -4.67409800 |
| C  | 3.65467700   | 4.32393100  | 4.67332700  |
| C  | 4.55806700   | 3.35378400  | -5.12526300 |
| Br | -14.10021300 | -2.94573000 | -0.00050700 |
| Br | 14.10021200  | 2.94575300  | 0.00264200  |
| C  | 12.53531300  | -4.04725300 | 0.16263700  |
| N  | 13.61322700  | -4.48508100 | 0.18448700  |
| C  | 10.24971400  | -4.64485900 | 0.15471900  |
| N  | 9.52035400   | -5.55191200 | 0.17030700  |
| C  | -12.53530900 | 4.04724200  | -0.16257400 |
| N  | -13.61321400 | 4.48510400  | -0.18423100 |
| C  | -10.24969900 | 4.64481700  | -0.15564300 |
| N  | -9.52034100  | 5.55186100  | -0.17182000 |
| H  | -0.25643400  | -2.49936000 | 0.10029500  |
| H  | 0.25644200   | 2.49934700  | -0.10087100 |
| H  | -2.49009000  | -3.71002500 | -0.19542000 |
| H  | -2.80490600  | -5.09489400 | -2.19669600 |
| H  | -3.97015600  | -1.62259200 | -4.42271500 |
| H  | -3.63148600  | -0.22795200 | -2.43184100 |
| H  | -1.48455900  | -0.97139700 | 2.54131900  |
| H  | -2.27936200  | -1.92108500 | 4.65648400  |
| H  | -5.77976800  | -3.41271700 | 2.68262600  |
| H  | -4.98011800  | -2.48636800 | 0.55876600  |
| H  | 2.49019200   | 3.71004000  | 0.19467300  |
| H  | 2.80501100   | 5.09501300  | 2.19586900  |
| H  | 3.97006400   | 1.62279800  | 4.42212900  |
| H  | 3.63138800   | 0.22804900  | 2.43132400  |
| H  | 4.98018600   | 2.48622200  | -0.55943500 |
| H  | 5.77982400   | 3.41250400  | -2.68332800 |
| H  | 2.27928800   | 1.92102000  | -4.65707000 |
| H  | 1.48450100   | 0.97139100  | -2.54187700 |
| H  | -6.18078100  | 3.94196500  | -0.11661900 |
| H  | 6.18077700   | -3.94197600 | 0.11643500  |
| H  | -8.38902700  | 3.39792200  | -0.11614100 |
| H  | 8.38902600   | -3.39793400 | 0.11609700  |
| H  | -13.82425800 | 2.01676000  | -0.12435600 |
| H  | -14.97074500 | -0.14701800 | -0.08055900 |
| H  | -11.20187200 | -2.23618300 | 0.01152700  |
| H  | 13.82424400  | -2.01675300 | 0.12577400  |
| H  | 14.97073200  | 0.14704100  | 0.08270400  |
| H  | 11.20187900  | 2.23619000  | -0.01058600 |
| H  | -4.25583900  | -4.40539700 | 5.19776800  |
| H  | -4.13729600  | -2.83230700 | 5.98835700  |
| H  | -5.64851700  | -3.32443100 | 5.20414600  |
| H  | -2.96296400  | -5.17021600 | -4.70629900 |
| H  | -4.67114800  | -4.73480800 | -4.67005900 |
| H  | -3.53857600  | -3.75086800 | -5.59812700 |
| H  | 2.96143100   | 5.16922200  | 4.70660800  |
| H  | 3.54071500   | 3.75068800  | 5.59734400  |
| H  | 4.67034300   | 4.73695300  | 4.66811300  |
| H  | 5.64850700   | 3.32492400  | -5.20452700 |
| H  | 4.13779100   | 2.83168200  | -5.98900900 |
| H  | 4.25515200   | 4.40503100  | -5.19877600 |

## NFBDT

|     |             |             |             |
|-----|-------------|-------------|-------------|
| 0 1 |             |             |             |
| C   | 0.98020900  | -0.96876600 | -0.00779400 |
| C   | 1.34193100  | 0.41636000  | 0.00415100  |
| C   | 3.50827200  | 2.51746200  | 1.34186400  |
| C   | 3.69136000  | 2.62593800  | -1.21461300 |
| C   | -3.69369400 | -2.62568700 | 1.21956300  |
| C   | 2.76329900  | 3.69670500  | 1.37381700  |
| C   | 2.50854500  | 4.34716300  | 2.57955900  |
| C   | 2.98524100  | 3.84458500  | 3.79008800  |
| C   | 3.72398600  | 2.65649300  | 3.75318400  |
| C   | 3.97992700  | 2.00424100  | 2.55473700  |
| C   | 2.95605400  | 2.28231300  | -2.34726200 |
| C   | 2.99401000  | 3.07919400  | -3.49101000 |
| C   | 3.76596600  | 4.23854900  | -3.54252000 |
| C   | 4.50720800  | 4.57701000  | -2.40338900 |
| C   | 4.47231700  | 3.78844100  | -1.26261400 |
| C   | -2.96359100 | -2.27866600 | 2.35507100  |
| C   | -3.00401900 | -3.07377600 | 3.49938800  |
| C   | -3.77235200 | -4.23621600 | 3.54878200  |
| C   | -4.50930500 | -4.57691900 | 2.40812900  |
| C   | -4.47221900 | -3.78936100 | 1.26617900  |
| C   | 2.73333300  | 4.55534300  | 5.08946200  |

|   |              |             |             |
|---|--------------|-------------|-------------|
| C | 3.80080200   | 5.10650200  | -4.76833300 |
| C | -3.79693900  | -5.10856600 | 4.77166400  |
| C | -2.72743500  | -4.55922000 | -5.08110900 |
| C | -3.97288800  | -2.00184000 | -2.55036800 |
| C | -3.71278000  | -2.65288700 | -3.74923100 |
| C | -2.97645000  | -3.84178100 | -3.78493100 |
| C | -2.50389300  | -4.34637900 | -2.57289000 |
| C | -2.76217100  | -3.69735600 | -1.36780700 |
| C | -3.50650400  | -2.51701500 | -1.33692900 |
| C | 8.63447400   | 0.27186000  | 0.03669400  |
| C | 9.68573800   | -0.61900100 | 0.01948800  |
| C | 11.10527700  | -0.29113400 | 0.04592700  |
| C | 11.85514400  | -1.56819100 | 0.01016100  |
| C | 10.93782400  | -2.62841800 | -0.03440600 |
| C | 9.56580000   | -2.08701200 | -0.02994000 |
| C | 11.69418600  | 0.95779700  | 0.09726100  |
| O | 8.53664500   | -2.74673700 | -0.06157300 |
| C | 13.22127200  | -1.85305600 | 0.01486300  |
| C | 13.62212900  | -3.18884100 | -0.02526400 |
| C | 12.69528200  | -4.23237500 | -0.06936900 |
| C | 11.32995200  | -3.95529200 | -0.07430400 |
| C | -8.63502200  | -0.27221300 | -0.04122400 |
| C | -9.68644200  | 0.61849900  | -0.02573700 |
| C | -11.10588700 | 0.29043300  | -0.05482500 |
| C | -11.85600200 | 1.56737400  | -0.02022500 |
| C | -10.93892100 | 2.62772400  | 0.02620500  |
| C | -9.56681300  | 2.08651700  | 0.02415500  |
| C | -11.69455800 | -0.95855900 | -0.10739100 |
| O | -8.53782000  | 2.74639600  | 0.05781900  |
| C | -13.22216100 | 1.85203600  | -0.02733000 |
| C | -13.62328700 | 3.18775400  | 0.01235200  |
| C | -12.69667400 | 4.23141500  | 0.05833100  |
| C | -11.33131300 | 3.95453200  | 0.06566300  |
| C | -2.75875400  | -0.56749300 | 0.01704700  |
| C | -3.42171600  | 0.64057100  | 0.02996000  |
| S | -2.38607100  | 2.02625300  | 0.03348800  |
| C | -3.73420200  | -1.74056000 | -0.02946000 |
| C | -5.05290400  | -0.97008500 | -0.03260700 |
| C | -4.83001300  | 0.40662800  | 0.01376300  |
| C | 2.75807900   | 0.56769600  | -0.01043400 |
| C | 3.42097800   | -0.64040600 | -0.02409900 |
| S | 2.38533300   | -2.02606900 | -0.02606400 |
| C | 3.73371900   | 1.74068600  | 0.03422200  |
| C | 5.05239400   | 0.97013100  | 0.03509500  |
| C | 4.82929700   | -0.40657500 | -0.01051400 |
| C | -6.40519400  | -1.27278100 | -0.04943600 |
| C | -7.22974700  | -0.13206300 | -0.02094200 |
| S | -6.25851900  | 1.34158700  | 0.03628500  |
| C | 6.40476800   | 1.27267500  | 0.04911200  |
| C | 7.22914600   | 0.13186800  | 0.01916300  |
| S | 6.25765500   | -1.34168800 | -0.03581700 |
| C | -0.33542900  | -1.39221600 | -0.00631800 |
| C | -1.34261200  | -0.41616300 | 0.00405700  |
| C | -0.98091400  | 0.96895900  | 0.01625500  |
| C | 0.33472300   | 1.39240600  | 0.01489800  |
| C | -13.10343700 | -1.16511700 | -0.13129700 |
| N | -14.24412600 | -1.39457200 | -0.15297200 |
| C | -10.97513700 | -2.18692200 | -0.14516500 |
| N | -10.43429000 | -3.21726600 | -0.17813300 |
| C | 13.10312600  | 1.16423200  | 0.11845600  |
| N | 14.24386300  | 1.39364600  | 0.13791400  |
| C | 10.97494400  | 2.18622500  | 0.13626700  |
| N | 10.43419400  | 3.21658600  | 0.17025400  |
| H | 2.38811900   | 4.12693500  | 0.44999300  |
| H | 1.92845000   | 5.26670800  | 2.57336300  |
| H | 4.10736800   | 2.23581900  | 4.67979200  |
| H | 4.55626100   | 1.08321300  | 2.56298300  |
| H | 2.34703800   | 1.38379800  | -2.34909400 |
| H | 2.40823500   | 2.78745500  | -4.35920700 |
| H | 5.12184000   | 5.47403600  | -2.41144000 |
| H | 5.04967600   | 4.08743500  | -0.39194100 |
| H | -2.35825400  | -1.37765100 | 2.35845000  |
| H | -2.42388900  | -2.77827800 | 4.37016000  |
| H | -5.12334500  | -5.47431200 | 2.41582500  |
| H | -5.04751500  | -4.08968600 | 0.39459600  |
| H | 1.99708900   | 5.35440800  | 4.97181300  |
| H | 2.36721300   | 3.86472200  | 5.85574300  |
| H | 3.65431300   | 5.00591200  | 5.47665500  |
| H | 3.25389000   | 4.64957600  | -5.59674800 |
| H | 3.35249400   | 6.08666900  | -4.57102100 |
| H | 4.82934900   | 5.28540300  | -5.09836300 |



|   |              |             |             |
|---|--------------|-------------|-------------|
| H | -3.17841500  | -6.00237100 | 4.62921700  |
| H | -3.41437400  | -4.57891900 | 5.64781800  |
| H | -4.81150200  | -5.45183900 | 4.99552700  |
| H | -2.54814800  | -3.85489600 | -5.89866500 |
| H | -1.86481300  | -5.22685700 | -5.00905400 |
| H | -3.59294400  | -5.16980900 | -5.36415000 |
| H | -4.54677300  | -1.07928500 | -2.55986000 |
| H | -4.09028200  | -2.22950100 | -4.67694100 |
| H | -1.92385600  | -5.26604600 | -2.56584000 |
| H | -2.38936700  | -4.12808400 | -0.44326300 |
| H | 8.90475900   | 1.32279500  | 0.07147500  |
| H | 13.97323000  | -1.07589300 | 0.04821400  |
| H | 14.68329900  | -3.41790700 | -0.02203100 |
| H | 13.04342400  | -5.26009600 | -0.09978100 |
| H | 10.58406000  | -4.74318500 | -0.10806900 |
| H | -8.90510000  | -1.32317200 | -0.07680300 |
| H | -13.97394100 | 1.07476500  | -0.06218900 |
| H | -14.68448300 | 3.41666400  | 0.00726500  |
| H | -13.04502200 | 5.25907900  | 0.08832900  |
| H | -10.58559700 | 4.74252700  | 0.10092700  |
| H | -6.82695200  | -2.27132800 | -0.08309900 |
| H | 6.82671500   | 2.27117400  | 0.08170200  |
| H | -0.59198600  | -2.44543100 | -0.01776400 |
| H | 0.59128100   | 2.44561700  | 0.02615400  |

## ITIC2

|     |             |             |             |
|-----|-------------|-------------|-------------|
| 0 1 |             |             |             |
| C   | -0.71237300 | -1.11293100 | 0.29763900  |
| C   | -1.43693400 | 0.10297800  | 0.06921700  |
| C   | -0.67933400 | 1.27738700  | -0.14396200 |
| C   | 0.70874900  | 1.14431600  | -0.13904100 |
| C   | 1.43360700  | -0.07245200 | 0.08551300  |
| C   | 0.67582900  | -1.24543600 | 0.30591800  |
| S   | 1.75559500  | 2.51729500  | -0.44650200 |
| C   | 3.12554500  | 1.49779500  | -0.23944200 |
| C   | 2.84892300  | 0.17457300  | 0.04537300  |
| S   | -1.76001700 | -2.48456200 | 0.60883800  |
| C   | -3.12941900 | -1.46717500 | 0.38981700  |
| C   | -2.85196500 | -0.14538700 | 0.10057600  |
| C   | 4.53342700  | 1.71222700  | -0.26580800 |
| C   | 5.17475800  | 0.50693100  | -0.00569400 |
| C   | 4.15547100  | -0.60010600 | 0.28715400  |
| S   | 5.61397000  | 2.99754300  | -0.54989900 |
| C   | 6.98764500  | 1.91287600  | -0.35442100 |
| C   | 6.56118000  | 0.61230000  | -0.06658400 |
| C   | -4.53781200 | -1.67734200 | 0.42910100  |
| C   | -5.17799100 | -0.47906800 | 0.13552600  |
| C   | -4.15752200 | 0.63159600  | -0.13792600 |
| S   | -5.61910700 | -2.95451100 | 0.74482100  |
| C   | -6.99253200 | -1.88689100 | 0.47130300  |
| C   | -6.56508200 | -0.59407000 | 0.15202500  |
| C   | 4.35253500  | -0.96714800 | 1.76627700  |
| C   | 4.35026300  | -1.74464700 | -0.72003700 |
| C   | -4.35365800 | 1.75210400  | 0.89842500  |
| C   | -4.34572500 | 1.03364500  | -1.60787900 |
| C   | 5.51346900  | -1.63692900 | 2.17690100  |
| C   | 5.75620400  | -1.89962200 | 3.51846400  |
| C   | 4.85921500  | -1.49347100 | 4.51225500  |
| C   | 3.71636700  | -0.80625100 | 4.10448500  |
| C   | 3.46675300  | -0.54576300 | 2.75832800  |
| C   | 4.54616100  | -3.07371500 | -0.35808800 |
| C   | 4.78010500  | -4.04801400 | -1.32862400 |
| C   | 4.81012800  | -3.73415500 | -2.68535300 |
| C   | 4.58841300  | -2.39905500 | -3.04565000 |
| C   | 4.36866900  | -1.42479600 | -2.08414800 |
| C   | -4.34547700 | 1.40364300  | 2.25626500  |
| C   | -4.56435800 | 2.35310100  | 3.24235100  |
| C   | -4.81132600 | 3.69269900  | 2.91454500  |
| C   | -4.80786200 | 4.03530500  | 1.56480900  |
| C   | -4.57413500 | 3.08564300  | 0.56949400  |
| C   | -3.45126000 | 0.63818000  | -2.60232500 |
| C   | -3.69035700 | 0.93166600  | -3.94350700 |
| C   | -4.83148500 | 1.62573700  | -4.34365900 |
| C   | -5.73793200 | 2.00513000  | -3.34805800 |
| C   | -5.50558700 | 1.70902100  | -2.01195500 |
| C   | 5.11701500  | -1.79981400 | 5.96008700  |
| C   | 5.07832800  | -4.77983300 | -3.73042100 |
| C   | -5.06543100 | 4.71387900  | 3.98717800  |

|   |              |             |             |
|---|--------------|-------------|-------------|
| C | -5.08202400  | 1.96152900  | -5.78608100 |
| C | 1.22496100   | -2.60300000 | 0.49477700  |
| C | -1.22991500  | 2.63731300  | -0.31179500 |
| C | -1.65196600  | 3.27485200  | -1.44837500 |
| C | -1.95056500  | 4.64948700  | -1.24021900 |
| C | -1.74454800  | 5.06699500  | 0.04744100  |
| S | -1.18099100  | 3.75548700  | 1.02251200  |
| C | 1.64575800   | -3.21831200 | 1.64425400  |
| C | 1.93581400   | -4.59868700 | 1.46520500  |
| C | 1.72495800   | -5.04199000 | 0.18677300  |
| S | 1.16808900   | -3.74834900 | -0.81526500 |
| C | 8.28343500   | 2.47984500  | -0.37653000 |
| C | -8.28707500  | -2.39816200 | 0.72532300  |
| C | 9.54101900   | 1.92765900  | -0.36410700 |
| C | -9.54422800  | -1.88451300 | 0.51983800  |
| C | 10.65522300  | 2.80050600  | 0.10907600  |
| C | 11.78399000  | 1.89326400  | 0.40866800  |
| C | 11.43243300  | 0.58186500  | 0.04693400  |
| C | 10.09384500  | 0.60827400  | -0.58423500 |
| C | -10.64934700 | -2.45084600 | 1.34700400  |
| C | -11.76983300 | -1.49150800 | 1.24034000  |
| C | -11.42329200 | -0.47233800 | 0.33702600  |
| C | -10.09857000 | -0.78626600 | -0.24272400 |
| C | 13.00916800  | 2.19975700  | 0.97671700  |
| C | 13.90342500  | 1.15581900  | 1.20627100  |
| C | 13.55827000  | -0.15447500 | 0.86758000  |
| C | 12.32958000  | -0.45897000 | 0.28040000  |
| C | -12.98479800 | -1.50826000 | 1.90446900  |
| C | -13.87331800 | -0.46073200 | 1.66951500  |
| C | -13.53302000 | 0.56718400  | 0.78710600  |
| C | -12.31486700 | 0.57394200  | 0.10652300  |
| O | 10.61943200  | 4.00802400  | 0.26359500  |
| C | 9.59439400   | -0.37046400 | -1.42132900 |
| O | -10.61248100 | -3.46963200 | 2.01335900  |
| C | -9.61176000  | -0.27782700 | -1.43124200 |
| C | -8.53115200  | -0.88228400 | -2.13016900 |
| N | -7.67777500  | -1.38329000 | -2.74185600 |
| C | -10.22668500 | 0.79792200  | -2.13213700 |
| N | -10.68845700 | 1.68729300  | -2.72370500 |
| C | 8.48833500   | -0.14321000 | -2.28527200 |
| N | 7.61372100   | 0.03064000  | -3.03254800 |
| C | 10.22285000  | -1.63492700 | -1.60480600 |
| N | 10.70004700  | -2.68354100 | -1.76793100 |
| H | 7.25715700   | -0.19404500 | 0.12652400  |
| H | -7.25994800  | 0.22083500  | -0.00598600 |
| H | 6.23983400   | -1.96527200 | 1.43974500  |
| H | 6.66566300   | -2.42510800 | 3.80009200  |
| H | 3.00427100   | -0.46174500 | 4.85053900  |
| H | 2.56787400   | -0.00106200 | 2.48859500  |
| H | 4.50453100   | -3.36965600 | 0.68341800  |
| H | 4.94001900   | -5.07661000 | -1.01391900 |
| H | 4.60153100   | -2.11686300 | -4.09559200 |
| H | 4.21881200   | -0.39456600 | -2.39700500 |
| H | -4.16732300  | 0.37010600  | 2.54364500  |
| H | -4.55135900  | 2.05004300  | 4.28677800  |
| H | -4.98796700  | 5.06784100  | 1.27485400  |
| H | -4.55283600  | 3.40417900  | -0.46579600 |
| H | -2.55403000  | 0.08761500  | -2.33923900 |
| H | -2.97232900  | 0.60553500  | -4.69204400 |
| H | -6.64882100  | 2.53105400  | -3.62421500 |
| H | -6.24162200  | 2.01417600  | -1.27433600 |
| H | 4.90126600   | -2.85098900 | 6.18432700  |
| H | 6.16408100   | -1.62326100 | 6.22456800  |
| H | 4.49161200   | -1.18784700 | 6.61509700  |
| H | 5.10594300   | -5.78205800 | -3.29466000 |
| H | 4.30920700   | -4.76934500 | -4.50965500 |
| H | 6.03967500   | -4.60484600 | -4.22642300 |
| H | -4.22557500  | 4.76984200  | 4.68808700  |
| H | -5.21644300  | 5.70965800  | 3.56240600  |
| H | -5.95523600  | 4.46079400  | 4.57411300  |
| H | -4.91986200  | 3.02880800  | -5.97660400 |
| H | -4.41557000  | 1.40193200  | -6.44726600 |
| H | -6.11407800  | 1.73694600  | -6.07248700 |
| H | -1.73827100  | 2.77346300  | -2.40479800 |
| H | -2.30381700  | 5.31425800  | -2.02141500 |
| H | 1.73572900   | -2.69680100 | 2.58962100  |
| H | 2.28653100   | -5.24916000 | 2.25948100  |
| H | 8.31940500   | 3.56707500  | -0.27921900 |
| H | -8.31943600  | -3.33436100 | 1.28694200  |
| H | 13.25034100  | 3.22660500  | 1.23317700  |
| H | 14.87144100  | 1.35736300  | 1.65422200  |

|   |              |             |             |
|---|--------------|-------------|-------------|
| H | 14.26079700  | -0.95850000 | 1.06399300  |
| H | 12.09338600  | -1.48638600 | 0.03294800  |
| H | -13.22258500 | -2.31845000 | 2.58660100  |
| H | -14.83332800 | -0.43782700 | 2.17565200  |
| H | -14.23124900 | 1.38226600  | 0.62365900  |
| H | -12.08208000 | 1.38779200  | -0.56894100 |
| C | 1.93482300   | -6.41259300 | -0.36602200 |
| H | 1.01384600   | -6.82698600 | -0.78870600 |
| H | 2.69137400   | -6.41527900 | -1.15786000 |
| H | 2.27357700   | -7.08218600 | 0.42837600  |
| C | -1.96360400  | 6.42442100  | 0.62839700  |
| H | -1.04579300  | 6.83602800  | 1.06065500  |
| H | -2.30553100  | 7.10804800  | -0.15254500 |
| H | -2.72130500  | 6.40606700  | 1.41897800  |

## BT-IC

|     |              |             |             |
|-----|--------------|-------------|-------------|
| 0 1 |              |             |             |
| C   | 0.99805100   | 0.92359200  | 0.31390600  |
| C   | 1.34959200   | -0.46249200 | 0.29175800  |
| C   | 3.51025200   | -2.52554200 | -1.24874300 |
| C   | 3.86592100   | -2.65468200 | 1.31964600  |
| C   | -3.63111000  | 2.55357300  | -1.22835700 |
| C   | 2.89339600   | -3.77539800 | -1.29726000 |
| C   | 2.64265000   | -4.40026300 | -2.51640600 |
| C   | 2.98753800   | -3.79949500 | -3.72766200 |
| C   | 3.58933800   | -2.53804200 | -3.67565200 |
| C   | 3.84738800   | -1.91463500 | -2.46169600 |
| C   | 3.37424600   | -2.21812000 | 2.55070500  |
| C   | 3.57078100   | -2.96749300 | 3.70829600  |
| C   | 4.26681100   | -4.17690200 | 3.67981900  |
| C   | 4.77525900   | -4.60169300 | 2.44791500  |
| C   | 4.58538300   | -3.85535900 | 1.29117100  |
| C   | -2.64352300  | 2.28112800  | -2.17308700 |
| C   | -2.59686200  | 2.97335600  | -3.38242600 |
| C   | -3.53069700  | 3.96038600  | -3.69263100 |
| C   | -4.52512500  | 4.22998700  | -2.74508000 |
| C   | -4.57712500  | 3.53989500  | -1.54238900 |
| C   | 2.74375400   | -4.48856900 | -5.04022100 |
| C   | 4.45196500   | -5.00311700 | 4.92074200  |
| C   | -3.47352600  | 4.71830000  | -4.98847700 |
| C   | -3.74025700  | 4.92671900  | 5.03895500  |
| C   | -3.91033500  | 2.01317900  | 2.59596500  |
| C   | -3.90152400  | 2.74560500  | 3.77455900  |
| C   | -3.71717000  | 4.13442000  | 3.76265300  |
| C   | -3.52708500  | 4.74878400  | 2.52609500  |
| C   | -3.52533600  | 4.01487400  | 1.33980200  |
| C   | -3.72552100  | 2.63713900  | 1.35544700  |
| C   | 8.63475500   | -0.22737200 | -0.21057100 |
| C   | 9.67342400   | 0.67856700  | -0.23883800 |
| C   | 11.09368700  | 0.37062400  | -0.33647900 |
| C   | 11.82761900  | 1.65729900  | -0.32834000 |
| C   | 10.89954000  | 2.70468900  | -0.23140800 |
| C   | 9.53659900   | 2.14406900  | -0.17236500 |
| C   | 11.69676500  | -0.87008900 | -0.42264600 |
| O   | 8.50114800   | 2.78937600  | -0.08453300 |
| C   | 13.18797800  | 1.96050700  | -0.39617600 |
| C   | 13.57304900  | 3.30131600  | -0.36456200 |
| C   | 12.63576200  | 4.33186500  | -0.26792600 |
| C   | 11.27580000  | 4.03636700  | -0.19993500 |
| C   | -8.63789100  | 0.21658900  | -0.12146900 |
| C   | -9.67318500  | -0.69135100 | -0.18230000 |
| C   | -11.09623500 | -0.38541100 | -0.23707800 |
| C   | -11.82540700 | -1.67423600 | -0.27196900 |
| C   | -10.89182300 | -2.72098900 | -0.24796500 |
| C   | -9.52974600  | -2.15784200 | -0.19322100 |
| C   | -11.70470600 | 0.85538100  | -0.26000100 |
| O   | -8.49033900  | -2.80185500 | -0.16028900 |
| C   | -13.18606100 | -1.97976400 | -0.32102600 |
| C   | -13.56595700 | -3.32218400 | -0.34464300 |
| C   | -12.62324200 | -4.35208900 | -0.32108600 |
| C   | -11.26298700 | -4.05428400 | -0.27196400 |
| C   | -2.76512700  | 0.60628300  | 0.18125500  |
| C   | -3.42019600  | -0.60616800 | 0.11259900  |
| S   | -2.39814800  | -1.99626500 | 0.16123200  |
| C   | -3.75943400  | 1.76979700  | 0.08572800  |
| C   | -5.07043800  | 0.97699300  | 0.03038200  |
| C   | -4.82684400  | -0.39448200 | 0.02062900  |
| C   | 2.76963600   | -0.61906300 | 0.20632100  |

|   |              |             |             |
|---|--------------|-------------|-------------|
| C | 3.42204100   | 0.59736000  | 0.17294400  |
| S | 2.39261000   | 1.98275100  | 0.23198300  |
| C | 3.76869700   | -1.77500500 | 0.07029500  |
| C | 5.07064200   | -0.97841600 | -0.00629300 |
| C | 4.82947700   | 0.39122700  | 0.06315700  |
| C | -6.42877900  | 1.25435000  | -0.01317500 |
| C | -7.23169900  | 0.09930400  | -0.06751700 |
| S | -6.23494100  | -1.35733900 | -0.05835700 |
| C | 6.42333000   | -1.26186200 | -0.10523000 |
| C | 7.23092800   | -0.10869500 | -0.11637500 |
| S | 6.24182900   | 1.35007700  | 0.00633900  |
| C | -0.30978100  | 1.38794100  | 0.36235100  |
| C | -1.34861000  | 0.43987100  | 0.29812900  |
| C | -0.99875500  | -0.94750400 | 0.29101400  |
| C | 0.31043000   | -1.41289800 | 0.33381300  |
| O | 0.58793000   | -2.74387100 | 0.32680200  |
| O | -0.57375000  | 2.72270100  | 0.40033800  |
| C | 0.29279400   | -3.45050700 | 1.53526700  |
| C | -0.36670300  | 3.32135900  | 1.68604200  |
| C | -13.11543100 | 1.04094400  | -0.31452700 |
| N | -14.25823500 | 1.25671400  | -0.35834300 |
| C | -11.00764100 | 2.09668000  | -0.23578100 |
| N | -10.48920400 | 3.13891300  | -0.21852100 |
| C | 13.10535000  | -1.05743000 | -0.51395500 |
| N | 14.24618000  | -1.27457600 | -0.59051800 |
| C | 10.99595100  | -2.10947200 | -0.43109900 |
| N | 10.47461800  | -3.15035100 | -0.44215100 |
| H | 2.59735000   | -4.26886400 | -0.37950600 |
| H | 2.16281800   | -5.37610700 | -2.52146500 |
| H | 3.86301200   | -2.03593200 | -4.60053800 |
| H | 4.31707500   | -0.93468400 | -2.46050400 |
| H | 2.83713700   | -1.27617900 | 2.61492700  |
| H | 3.17538700   | -2.59933000 | 4.65197900  |
| H | 5.33603500   | -5.53169300 | 2.39271200  |
| H | 5.00354700   | -4.21457300 | 0.35534100  |
| H | -1.89873400  | 1.51702400  | -1.98065000 |
| H | -1.81379100  | 2.73431700  | -4.09774200 |
| H | -5.27464300  | 4.98931400  | -2.95485100 |
| H | -5.36335800  | 3.78310600  | -0.83410800 |
| H | 1.94691000   | -5.23263000 | -4.95890400 |
| H | 2.46735700   | -3.77360400 | -5.82061600 |
| H | 3.64526300   | -5.00969100 | -5.38375600 |
| H | 4.31734900   | -4.40234100 | 5.82396700  |
| H | 3.72492900   | -5.82285000 | 4.95923800  |
| H | 5.44796700   | -5.45440800 | 4.95416900  |
| H | -2.74783100  | 4.27756900  | -5.67654000 |
| H | -4.44929300  | 4.73151400  | -5.48451300 |
| H | -3.18415200  | 5.76217400  | -4.82209700 |
| H | -3.14441400  | 4.44316300  | 5.81932500  |
| H | -3.35117600  | 5.93699000  | 4.88885400  |
| H | -4.76170700  | 5.01883000  | 5.42579900  |
| H | -4.06212100  | 0.93717900  | 2.63873700  |
| H | -4.04488600  | 2.23224500  | 4.72245100  |
| H | -3.36898400  | 5.82375600  | 2.48226600  |
| H | -3.35065600  | 4.52836200  | 0.40111900  |
| H | 8.91719400   | -1.27400500 | -0.26913500 |
| H | 13.94782400  | 1.19408000  | -0.47169100 |
| H | 14.62969200  | 3.54472500  | -0.41657500 |
| H | 12.97135900  | 5.36390600  | -0.24591400 |
| H | 10.52299800  | 4.81468700  | -0.12413800 |
| H | -8.92594500  | 1.26326000  | -0.11051900 |
| H | -13.94996300 | -1.21389400 | -0.34042700 |
| H | -14.62277800 | -3.56745000 | -0.38235800 |
| H | -12.95486200 | -5.38545700 | -0.34105600 |
| H | -10.50608700 | -4.83206200 | -0.25248600 |
| H | -6.87581700  | 2.24187800  | -0.00004800 |
| H | 6.85548500   | -2.25468600 | -0.16850900 |
| H | 0.58755800   | -4.48491100 | 1.35557500  |
| H | 0.87337500   | -3.04746600 | 2.36906400  |
| H | -0.77437600  | -3.41809600 | 1.77510100  |
| H | -0.56535700  | 4.38499400  | 1.56044400  |
| H | -1.06346700  | 2.90606200  | 2.42019400  |
| H | 0.66350200   | 3.18005400  | 2.02830100  |

# ITVFFIC

|   |   |              |             |             |
|---|---|--------------|-------------|-------------|
| 0 | 1 |              |             |             |
| C |   | -1.10190800  | 0.82196700  | -0.01870000 |
| C |   | -1.26465700  | -0.58313800 | 0.04229100  |
| C |   | -0.16265400  | -1.41790900 | 0.05839200  |
| C |   | 1.10194200   | -0.82209100 | 0.01787000  |
| C |   | 1.26469000   | 0.58301300  | -0.04312500 |
| C |   | 0.16268700   | 1.41778500  | -0.05923000 |
| C |   | 2.42598500   | -1.39125700 | 0.03217200  |
| C |   | 3.38756500   | -0.40080300 | 0.00187600  |
| C |   | 2.74925500   | 0.97497100  | -0.06393300 |
| C |   | -2.42594900  | 1.39113900  | -0.03294400 |
| C |   | -3.38753100  | 0.40068800  | -0.00260300 |
| C |   | -2.74922500  | -0.97509100 | 0.06312900  |
| C |   | 3.04668600   | 1.83690400  | 1.16795400  |
| C |   | 3.18148500   | 1.64110800  | -1.37726400 |
| C |   | -3.04668900  | -1.83694800 | -1.16880700 |
| C |   | -3.18141600  | -1.64130900 | 1.37642700  |
| C |   | 2.82230700   | 3.21736800  | 1.13661200  |
| C |   | 3.01320900   | 3.99652900  | 2.27148300  |
| C |   | 3.43855500   | 3.43059000  | 3.47732200  |
| C |   | 3.65631300   | 2.05187400  | 3.50455400  |
| C |   | 3.46339400   | 1.26636500  | 2.37167400  |
| C |   | 4.39665500   | 2.33133900  | -1.44357000 |
| C |   | 4.85154900   | 2.86359500  | -2.64452000 |
| C |   | 4.11183200   | 2.73000600  | -3.82283400 |
| C |   | 2.90309800   | 2.03403200  | -3.75291600 |
| C |   | 2.44406500   | 1.49678300  | -2.55387500 |
| C |   | -2.82226700  | -3.21741600 | -1.13755800 |
| C |   | -3.01320900  | -3.99651300 | -2.27245800 |
| C |   | -3.43863800  | -3.43051200 | -3.47824800 |
| C |   | -3.65643700  | -2.05180800 | -3.50538500 |
| C |   | -3.46347800  | -1.26635500 | -2.37246400 |
| C |   | -2.44399700  | -1.49702400 | 2.55302400  |
| C |   | -2.90300100  | -2.03437600 | 3.75205100  |
| C |   | -4.11168800  | -2.73039600 | 3.82194200  |
| C |   | -4.85142200  | -2.86395000 | 2.64361200  |
| C |   | -4.39657000  | -2.33160500 | 1.44270600  |
| S |   | 3.05780200   | -3.00172100 | 0.07297000  |
| C |   | 4.67711500   | -2.35505600 | 0.05388800  |
| C |   | 4.68218500   | -0.94904200 | 0.00906400  |
| C |   | 5.95215900   | -2.92772800 | 0.07908400  |
| C |   | 6.95364700   | -1.96278100 | 0.05473500  |
| S |   | 6.29295700   | -0.33251800 | -0.00396900 |
| S |   | -3.05776000  | 3.00160300  | -0.07365300 |
| C |   | -4.67707200  | 2.35495000  | -0.05446100 |
| C |   | -4.68214900  | 0.94893500  | -0.00967700 |
| C |   | -5.95211400  | 2.92763300  | -0.07951300 |
| C |   | -6.95360800  | 1.96269500  | -0.05508500 |
| S |   | -6.29293100  | 0.33242400  | 0.00350300  |
| C |   | 8.34612800   | -2.22657200 | 0.07283500  |
| C |   | -8.34608600  | 2.22651400  | -0.07299700 |
| C |   | 9.35870700   | -1.30268800 | 0.04964200  |
| C |   | -9.35869000  | 1.30266100  | -0.04969100 |
| C |   | 10.70404500  | -1.73301400 | 0.07860800  |
| C |   | -10.70401500 | 1.73304400  | -0.07840600 |
| C |   | 11.81763800  | -0.92082400 | 0.06234200  |
| C |   | -11.81764500 | 0.92091000  | -0.06189600 |
| C |   | 13.21549700  | -1.31647000 | 0.09327500  |
| C |   | 14.02830500  | -0.08067800 | 0.05416400  |
| C |   | 13.16855400  | 1.02421900  | 0.00226500  |
| C |   | 11.76469000  | 0.56009100  | 0.00523300  |
| C |   | -13.21549000 | 1.31663300  | -0.09247600 |
| C |   | -14.02835900 | 0.08089900  | -0.05279300 |
| C |   | -13.16865600 | -1.02404200 | -0.00105000 |
| C |   | -11.76476400 | -0.56000100 | -0.00463900 |
| O |   | 10.78115100  | 1.28238400  | -0.03309100 |
| C |   | 13.73786000  | -2.59419700 | 0.14992100  |
| O |   | -10.78125300 | -1.28234800 | 0.03338900  |
| C |   | -13.73779200 | 2.59437500  | -0.14935000 |
| C |   | 15.40923200  | 0.12428300  | 0.06234500  |
| C |   | 15.86557600  | 1.43117700  | 0.01710100  |
| C |   | 14.99270500  | 2.52351400  | -0.03466700 |
| C |   | 13.62289600  | 2.33222700  | -0.04273700 |
| C |   | -15.40930200 | -0.12397700 | -0.06034400 |
| C |   | -15.86571000 | -1.43083300 | -0.01465300 |
| C |   | -14.99288500 | -2.52321600 | 0.03693900  |
| C |   | -13.62306100 | -2.33201400 | 0.04438400  |
| F |   | 15.51555100  | 3.74525200  | -0.07530200 |

|   |              |             |             |
|---|--------------|-------------|-------------|
| F | 17.17290100  | 1.67825700  | 0.02253400  |
| F | -17.17305200 | -1.67783200 | -0.01946600 |
| F | -15.51579000 | -3.74491400 | 0.07802900  |
| C | -4.58864400  | -3.33729100 | 5.11086100  |
| C | -3.68099300  | -4.28177400 | -4.69223300 |
| C | 4.58870500   | 3.33682300  | -5.11182000 |
| C | 3.68090600   | 4.28190800  | 4.69126700  |
| C | 15.13418400  | -2.87058000 | 0.17244600  |
| N | 16.26537900  | -3.14341300 | 0.19241000  |
| C | 12.94800200  | -3.77773600 | 0.19232500  |
| N | 12.34501300  | -4.77257900 | 0.22908800  |
| C | -15.13410600 | 2.87083900  | -0.17148300 |
| N | -16.26528700 | 3.14375300  | -0.19112300 |
| C | -12.94787300 | 3.77784900  | -0.19244200 |
| N | -12.34484400 | 4.77264700  | -0.22974100 |
| H | -0.27249700  | -2.49729600 | 0.09934000  |
| H | 0.27253200   | 2.49717300  | -0.10015600 |
| H | 2.50778500   | 3.69228200  | 0.21154500  |
| H | 2.83139700   | 5.06730500  | 2.21815300  |
| H | 3.98427300   | 1.58054400  | 4.42791500  |
| H | 3.63685400   | 0.19582600  | 2.43142000  |
| H | 4.98990300   | 2.46840300  | -0.54368800 |
| H | 5.80068100   | 3.39375900  | -2.66468700 |
| H | 2.30675500   | 1.90691400  | -4.65331300 |
| H | 1.50152000   | 0.95812800  | -2.54118500 |
| H | -2.50768200  | -3.69236900 | -0.21253200 |
| H | -2.83136800  | -5.06728800 | -2.21920500 |
| H | -3.98446500  | -1.58042700 | -4.42869500 |
| H | -3.63698900  | -0.19582100 | -2.43214300 |
| H | -1.50147000  | -0.95834000 | 2.54036100  |
| H | -2.30665100  | -1.90728800 | 4.65244600  |
| H | -5.80052400  | -3.39417200 | 2.66376000  |
| H | -4.98981100  | -2.46864400 | 0.54281500  |
| H | 6.16472100   | -3.98990800 | 0.11342800  |
| H | -6.16467000  | 3.98981600  | -0.11379600 |
| H | 8.61149400   | -3.28307700 | 0.11100400  |
| H | -8.61143000  | 3.28302700  | -0.11109300 |
| H | 9.15225900   | -0.23755700 | 0.01064400  |
| H | -9.15227400  | 0.23752000  | -0.01076600 |
| H | 10.84921500  | -2.80895700 | 0.11827900  |
| H | -10.84914400 | 2.80899400  | -0.11803300 |
| H | 16.14039000  | -0.67255000 | 0.10144900  |
| H | 12.93904800  | 3.17325000  | -0.08235300 |
| H | -16.14042800 | 0.67289500  | -0.09927500 |
| H | -12.93924800 | -3.17307100 | 0.08386400  |
| H | -4.26612500  | -4.38180300 | 5.19618000  |
| H | -4.18983200  | -2.80116300 | 5.97624300  |
| H | -5.68030600  | -3.32901000 | 5.17574300  |
| H | -2.98983700  | -5.12853900 | -4.73128000 |
| H | -4.69758800  | -4.69250900 | -4.68661600 |
| H | -3.56786000  | -3.70438800 | -5.61376400 |
| H | 5.68046500   | 3.33195600  | -5.17514000 |
| H | 4.19282000   | 2.79836200  | -5.97710800 |
| H | 4.26290400   | 4.38017100  | -5.19893200 |
| H | 4.69746300   | 4.69274000  | 4.68556900  |
| H | 2.98967400   | 5.12860900  | 4.73033800  |
| H | 3.56789500   | 3.70454100  | 5.61282500  |

## INIC

|     |             |             |             |
|-----|-------------|-------------|-------------|
| 0 1 |             |             |             |
| C   | -0.83039800 | -1.11756000 | 0.01092400  |
| C   | -1.36152200 | 0.19424400  | 0.01205300  |
| C   | -0.53702800 | 1.32326200  | 0.00388700  |
| C   | 0.83040200  | 1.11756200  | -0.01093100 |
| C   | 1.36152700  | -0.19424300 | -0.01206000 |
| C   | 0.53703200  | -1.32326000 | -0.00389500 |
| C   | -1.94533100 | -2.17433500 | 0.00887400  |
| C   | 1.94533600  | 2.17433700  | -0.00887500 |
| C   | -2.79737600 | 0.05781700  | 0.01577100  |
| C   | -3.16652600 | -1.27160700 | -0.00011700 |
| C   | 2.79738000  | -0.05781600 | -0.01578000 |
| C   | 3.16653100  | 1.27160800  | 0.00010900  |
| C   | -1.97922100 | -3.01612500 | 1.29172400  |
| C   | -1.81386600 | -3.02182300 | -1.26138400 |
| C   | 1.97922300  | 3.01614100  | -1.29171500 |
| C   | -1.39481100 | -2.56807600 | 2.47776200  |
| C   | -1.51320100 | -3.30368400 | 3.65331000  |
| C   | -2.21839800 | -4.50832300 | 3.68926500  |

|   |              |             |             |
|---|--------------|-------------|-------------|
| C | -2.81080700  | -4.94813100 | 2.50207300  |
| C | -2.69463100  | -4.21813700 | 1.32475400  |
| C | -2.46918000  | -2.66764000 | -2.44189500 |
| C | -2.27781300  | -3.39756800 | -3.61143300 |
| C | -1.42582900  | -4.50308900 | -3.64561000 |
| C | -0.76554200  | -4.84964900 | -2.46285100 |
| C | -0.95570700  | -4.12621200 | -1.29142600 |
| C | 2.69461900   | 4.21816100  | -1.32472700 |
| C | 2.81079000   | 4.94817100  | -2.50203800 |
| C | 2.21839100   | 4.50837000  | -3.68923600 |
| C | 1.51320800   | 3.30372100  | -3.65329900 |
| C | 1.39482400   | 2.56809800  | -2.47776100 |
| C | -2.31668000  | -5.31780200 | 4.95114800  |
| C | -1.24540700  | -5.30977600 | -4.90014500 |
| C | 2.31665600   | 5.31786700  | -4.95111000 |
| C | 1.24536000   | 5.30972200  | 4.90017200  |
| C | 0.95570900   | 4.12620100  | 1.29144400  |
| C | 0.76553800   | 4.84962300  | 2.46287200  |
| C | 1.42582300   | 4.50304800  | 3.64563500  |
| C | 2.27781000   | 3.39753500  | 3.61144700  |
| C | 2.46918400   | 2.66761900  | 2.44189800  |
| C | 1.81387200   | 3.02181100  | 1.26139300  |
| C | -10.50735800 | -0.62817900 | -0.03583600 |
| C | -11.46730600 | 0.35830600  | -0.03636900 |
| C | -11.20930400 | 1.81013900  | -0.01021600 |
| C | -12.52472100 | 2.47775000  | -0.01784800 |
| C | -13.53728500 | 1.50713900  | -0.04754000 |
| C | -12.91189100 | 0.16514300  | -0.06118100 |
| O | -10.12246100 | 2.36913300  | 0.01400000  |
| C | -13.61516200 | -1.02348000 | -0.09415500 |
| C | -12.79260600 | 3.83606600  | 0.00013700  |
| C | -14.12626500 | 4.23821200  | -0.01202300 |
| C | -15.14622900 | 3.28473900  | -0.04144400 |
| C | -14.87100000 | 1.91723200  | -0.05954100 |
| C | 10.50736300  | 0.62817700  | 0.03582700  |
| C | 11.46730900  | -0.35830900 | 0.03636500  |
| C | 11.20930600  | -1.81014200 | 0.01020200  |
| C | 12.52472300  | -2.47775400 | 0.01781800  |
| C | 13.53728800  | -1.50714400 | 0.04751200  |
| O | 12.91189400  | -0.16514800 | 0.06117600  |
| C | 10.12246200  | -2.36913400 | -0.01401000 |
| C | 13.61516700  | 1.02347400  | 0.09417700  |
| C | 12.79260600  | -3.83607000 | -0.00018300 |
| C | 14.12626500  | -4.23821700 | 0.01196000  |
| C | 15.14623000  | -3.28474500 | 0.04138000  |
| C | 14.87100300  | -1.91723800 | 0.05949400  |
| C | 4.56616800   | 1.41419500  | -0.00855500 |
| C | 5.23177900   | 0.17793000  | -0.02189300 |
| S | 4.12652200   | -1.16449600 | -0.03841100 |
| S | 5.65977200   | 2.76968800  | 0.01551400  |
| C | 7.01867200   | 1.67055300  | 0.01354900  |
| C | 6.63083600   | 0.31979400  | -0.00965100 |
| C | -4.56616300  | -1.41419400 | 0.00854800  |
| C | -5.23177500  | -0.17792900 | 0.02188600  |
| S | -4.12651800  | 1.16449700  | 0.03840100  |
| S | -5.65976700  | -2.76968800 | -0.01552600 |
| C | -7.01866800  | -1.67055300 | -0.01356000 |
| C | -6.63083200  | -0.31979400 | 0.00964200  |
| C | 8.39812800   | 1.83968500  | 0.02743100  |
| C | 9.09342000   | 0.62281500  | 0.01763600  |
| S | 7.98130300   | -0.75009800 | -0.01324600 |
| C | -8.39812300  | -1.83968500 | -0.02744300 |
| C | -9.09341600  | -0.62281600 | -0.01764600 |
| S | -7.98129900  | 0.75009700  | 0.01324000  |
| C | -13.01405000 | -2.31438500 | -0.11147900 |
| N | -12.57139100 | -3.39093200 | -0.12712900 |
| C | -15.03729000 | -1.09749100 | -0.11619700 |
| N | -16.19439400 | -1.21967000 | -0.13525600 |
| C | 13.01405500  | 2.31437900  | 0.11153800  |
| N | 12.57139800  | 3.39092600  | 0.12721900  |
| C | 15.03729400  | 1.09748300  | 0.11621400  |
| N | 16.19439900  | 1.21966200  | 0.13527000  |
| H | -0.95685200  | 2.32459600  | 0.01074300  |
| H | 0.95685600   | -2.32459500 | -0.01075200 |
| H | -0.84141400  | -1.63415300 | 2.48978900  |
| H | -1.04602700  | -2.93066600 | 4.56156900  |
| H | -3.37284500  | -5.87899500 | 2.49679500  |
| H | -3.15437400  | -4.59838500 | 0.41671200  |
| H | -3.13373300  | -1.80859700 | -2.45502600 |
| H | -2.80323400  | -3.09902700 | -4.51541100 |
| H | -0.09167100  | -5.70311200 | -2.45695700 |

|   |              |             |             |
|---|--------------|-------------|-------------|
| H | -0.43890300  | -4.43307200 | -0.38654800 |
| H | 3.15435400   | 4.59840200  | -0.41667900 |
| H | 3.37281800   | 5.87904100  | -2.49674700 |
| H | 1.04604300   | 2.93070800  | -4.56156400 |
| H | 0.84143800   | 1.63416800  | -2.48980000 |
| H | -2.17114700  | -4.69458700 | 5.83748400  |
| H | -3.28981000  | -5.81024000 | 5.03452300  |
| H | -1.55274100  | -6.10398100 | 4.97404100  |
| H | -1.94803600  | -6.15100900 | -4.93060900 |
| H | -1.42327500  | -4.70432100 | -5.79301500 |
| H | -0.23676200  | -5.72758400 | -4.96454300 |
| H | 1.55255200   | 6.10388200  | -4.97409800 |
| H | 3.28969200   | 5.81051000  | -5.03436800 |
| H | 2.17136000   | 4.69462000  | -5.83746100 |
| H | 0.23640700   | 5.72672600  | 4.96500900  |
| H | 1.42413700   | 4.70450600  | 5.79302000  |
| H | 1.94731200   | 6.15153600  | 4.93020200  |
| H | 0.43891000   | 4.43307100  | 0.38656700  |
| H | 0.09166500   | 5.70308500  | 2.45698600  |
| H | 2.80323100   | 3.09898800  | 4.51542200  |
| H | 3.13374100   | 1.80857900  | 2.45502300  |
| H | -10.87607900 | -1.64902000 | -0.05380100 |
| H | -11.97725900 | 4.55228400  | 0.02296000  |
| H | -15.69188100 | 1.21275200  | -0.08207900 |
| H | 10.87608400  | 1.64901900  | 0.05378800  |
| H | 11.97725800  | -4.55228700 | -0.02300500 |
| H | 15.69188400  | -1.21275900 | 0.08203000  |
| H | 8.91314500   | 2.79349000  | 0.04603400  |
| H | -8.91314000  | -2.79349100 | -0.04604800 |
| H | -14.37727000 | 5.29421100  | 0.00131900  |
| H | -16.18145200 | 3.61147100  | -0.05053200 |
| H | 16.18145300  | -3.61147800 | 0.05045300  |
| H | 14.37726900  | -5.29421600 | -0.00139500 |

## INIC2

|     |              |             |             |
|-----|--------------|-------------|-------------|
| 0 1 |              |             |             |
| C   | -0.80430100  | -1.13674800 | 0.01003100  |
| C   | -1.36541100  | 0.16263300  | 0.01128100  |
| C   | -0.56746200  | 1.31073100  | 0.00411000  |
| C   | 0.80430300   | 1.13674700  | -0.00998500 |
| C   | 1.36541200   | -0.16263300 | -0.01123700 |
| C   | 0.56746300   | -1.31073100 | -0.00406600 |
| C   | -1.89459900  | -2.21893300 | 0.00693900  |
| C   | 1.89460100   | 2.21893300  | -0.00688800 |
| C   | -2.79761400  | -0.00695000 | 0.01369900  |
| C   | -3.13631400  | -1.34463000 | -0.00353800 |
| C   | 2.79761600   | 0.00694900  | -0.01366200 |
| C   | 3.13631600   | 1.34462900  | 0.00357400  |
| C   | -1.91114300  | -3.06126500 | 1.28980300  |
| C   | -1.74193100  | -3.06392100 | -1.26265100 |
| C   | 1.91113800   | 3.06128100  | -1.28974100 |
| C   | -1.33507300  | -2.60298100 | 2.47596300  |
| C   | -1.43899300  | -3.34180200 | 3.65096400  |
| C   | -2.12093700  | -4.55973800 | 3.68617400  |
| C   | -2.70501600  | -5.00999600 | 2.49874000  |
| C   | -2.60309600  | -4.27697200 | 1.32205700  |
| C   | -2.40258900  | -2.72520600 | -2.44472500 |
| C   | -2.19230600  | -3.45135300 | -3.61340400 |
| C   | -1.31537400  | -4.53727000 | -3.64512100 |
| C   | -0.65013000  | -4.86832900 | -2.46069200 |
| C   | -0.85927900  | -4.14885000 | -1.29007500 |
| C   | 2.60310100   | 4.27698100  | -1.32198800 |
| C   | 2.70501300   | 5.01002000  | -2.49866400 |
| C   | 2.12091500   | 4.55978100  | -3.68609600 |
| C   | 1.43896300   | 3.34184800  | -3.65089300 |
| C   | 1.33505200   | 2.60301500  | -2.47590100 |
| C   | -2.20344100  | -5.37198100 | 4.94740700  |
| C   | -1.11354700  | -5.34011700 | -4.89885400 |
| C   | 2.20339900   | 5.37204000  | -4.94732000 |
| C   | 1.11353100   | 5.34005100  | 4.89894500  |
| C   | 0.85925800   | 4.14881200  | 1.29016700  |
| C   | 0.65011100   | 4.86827300  | 2.46079000  |
| C   | 1.31538700   | 4.53721700  | 3.64520800  |
| C   | 2.19234700   | 3.45132900  | 3.61346200  |
| C   | 2.40262900   | 2.72519600  | 2.44477000  |
| C   | 1.74194000   | 3.06390300  | 1.26271500  |
| C   | -10.48864300 | -0.86244700 | -0.03794100 |
| C   | -11.46971100 | 0.10401500  | -0.03560200 |



|   |              |             |             |
|---|--------------|-------------|-------------|
| C | -11.24234900 | 1.56176800  | -0.00936300 |
| C | -12.56933200 | 2.20019700  | -0.01458700 |
| C | -13.56178600 | 1.20937100  | -0.04287200 |
| C | -12.90783700 | -0.12090000 | -0.05753800 |
| O | -10.16739100 | 2.14341200  | 0.01273700  |
| C | -13.58994100 | -1.32125200 | -0.08845300 |
| C | -12.86953400 | 3.55343400  | 0.00429300  |
| C | -14.20606100 | 3.93486700  | -0.00537500 |
| C | -15.18325400 | 2.94338300  | -0.03357700 |
| C | -14.90385300 | 1.58126400  | -0.05276500 |
| C | 10.48864600  | 0.86244700  | 0.03789300  |
| C | 11.46971400  | -0.10401400 | 0.03555000  |
| C | 11.24235400  | -1.56176800 | 0.00931200  |
| C | 12.56933700  | -2.20019500 | 0.01450700  |
| C | 13.56179100  | -1.20936800 | 0.04277700  |
| C | 12.90784000  | 0.12090200  | 0.05746700  |
| O | 10.16739600  | -2.14341300 | -0.01277000 |
| C | 13.58994300  | 1.32125500  | 0.08839200  |
| C | 12.86954100  | -3.55343100 | -0.00438600 |
| C | 14.20606800  | -3.93486300 | 0.00525200  |
| C | 15.18326000  | -2.94337800 | 0.03343700  |
| C | 14.90385800  | -1.58125900 | 0.05263900  |
| C | 4.53235500   | 1.51878800  | -0.00376300 |
| C | 5.22551600   | 0.29745400  | -0.01785800 |
| S | 4.15097800   | -1.06918500 | -0.03664500 |
| S | 5.59576000   | 2.89813700  | 0.02224300  |
| C | 6.97875400   | 1.82913100  | 0.01961800  |
| C | 6.62072800   | 0.46989300  | -0.00491500 |
| C | -4.53235300  | -1.51878900 | 0.00378900  |
| C | -5.22551400  | -0.29745500 | 0.01787800  |
| S | -4.15097700  | 1.06918400  | 0.03667800  |
| S | -5.59575800  | -2.89813800 | -0.02223400 |
| C | -6.97875200  | -1.82913200 | -0.01962700 |
| C | -6.62072600  | -0.46989400 | 0.00491500  |
| C | 8.35386700   | 2.02810700  | 0.03319700  |
| C | 9.07585500   | 0.82627600  | 0.02182800  |
| S | 7.99384300   | -0.57069300 | -0.00953100 |
| C | -8.35386500  | -2.02810800 | -0.03322500 |
| C | -9.07585300  | -0.82627700 | -0.02186000 |
| S | -7.99384100  | 0.57069300  | 0.00951800  |
| C | -12.96475600 | -2.60067800 | -0.10507000 |
| N | -12.50045000 | -3.66794500 | -0.11976700 |
| C | -15.01062500 | -1.41802800 | -0.10836000 |
| N | -16.16628800 | -1.55276800 | -0.12566700 |
| C | 12.96475600  | 2.60067900  | 0.10504600  |
| N | 12.50045100  | 3.66794600  | 0.11977000  |
| C | 15.01062700  | 1.41803200  | 0.10827700  |
| N | 16.16629000  | 1.55277600  | 0.12556300  |
| H | -1.01042300  | 2.30217100  | 0.01128200  |
| H | 1.01042400   | -2.30217200 | -0.01124000 |
| H | -0.79980500  | -1.65856600 | 2.48880300  |
| H | -0.97879900  | -2.96068500 | 4.55942000  |
| H | -3.24892800  | -5.95155300 | 2.49282100  |
| H | -3.05549700  | -4.66541100 | 0.41378900  |
| H | -3.08629000  | -1.88133900 | -2.45986500 |
| H | -2.72235000  | -3.16531500 | -4.51872200 |
| H | 0.04276700   | -5.70639400 | -2.45285000 |
| H | -0.33804700  | -4.44374700 | -0.38375300 |
| H | 3.05551900   | 4.66540500  | -0.41372200 |
| H | 3.24893300   | 5.95157100  | -2.49274100 |
| H | 0.97875600   | 2.96074500  | -4.55934900 |
| H | 0.79977900   | 1.65860300  | -2.48874600 |
| H | -2.06858100  | -4.74704100 | 5.83420200  |
| H | -3.16736200  | -5.88215800 | 5.03105900  |
| H | -1.42530900  | -6.14414800 | 4.96889900  |
| H | -1.79649300  | -6.19736300 | -4.93058900 |
| H | -1.30316100  | -4.73929900 | -5.79242700 |
| H | -0.09539500  | -5.73459700 | -4.96062500 |
| H | 1.42511500   | 6.14405200  | -4.96889800 |
| H | 3.16722900   | 5.88240600  | -5.03086800 |
| H | 2.06875500   | 4.74707400  | -5.83413000 |
| H | 0.09507200   | 5.73366800  | 4.96119300  |
| H | 1.30411800   | 4.73951000  | 5.79249500  |
| H | 1.79574500   | 6.19789700  | 4.93020600  |
| H | 0.33800200   | 4.44370400  | 0.38385600  |
| H | -0.04280800  | 5.70632000  | 2.45296800  |
| H | 2.72241900   | 3.16529800  | 4.51876700  |
| H | 3.08635400   | 1.88134900  | 2.45989100  |
| H | -10.83597800 | -1.89084000 | -0.05639400 |
| H | -15.72809100 | 0.88103100  | -0.07397800 |
| H | 10.83597900  | 1.89084100  | 0.05633500  |

|   |              |             |             |
|---|--------------|-------------|-------------|
| H | 15.72809600  | -0.88102600 | 0.07383800  |
| H | 8.84801000   | 2.99282900  | 0.05213800  |
| H | -8.84800700  | -2.99283000 | -0.05217500 |
| H | -14.50744400 | 4.97641300  | 0.00827300  |
| H | 14.50745200  | -4.97640900 | -0.00840800 |
| H | 12.07214900  | -4.28911600 | -0.02614800 |
| H | -12.07214200 | 4.28911700  | 0.02606800  |
| F | 16.46447100  | -3.31902000 | 0.04256500  |
| F | -16.46446300 | 3.31902600  | -0.04273500 |

## INICI

|     |              |             |             |
|-----|--------------|-------------|-------------|
| 0 1 |              |             |             |
| C   | -0.80582800  | -1.13570900 | 0.01013600  |
| C   | -1.36512700  | 0.16445100  | 0.01031500  |
| C   | -0.56570500  | 1.31152100  | 0.00300700  |
| C   | 0.80583000   | 1.13570800  | -0.01012100 |
| C   | 1.36512900   | -0.16445200 | -0.01030100 |
| C   | 0.56570600   | -1.31152200 | -0.00299300 |
| C   | -1.89760700  | -2.21641500 | 0.00679900  |
| C   | 1.89761000   | 2.21641400  | -0.00677900 |
| C   | -2.79753800  | -0.00308500 | 0.01209600  |
| C   | -3.13810700  | -1.34038800 | -0.00440400 |
| C   | 2.79754000   | 0.00308300  | -0.01208600 |
| C   | 3.13810900   | 1.34038600  | 0.00441200  |
| C   | -1.91574600  | -3.05863800 | 1.28969100  |
| C   | -1.74545600  | -3.06170700 | -1.26267300 |
| C   | 1.91574300   | 3.05865200  | -1.28966100 |
| C   | -1.33986800  | -2.60084800 | 2.47613000  |
| C   | -1.44501800  | -3.33957200 | 3.65107500  |
| C   | -2.12804900  | -4.55690700 | 3.68593500  |
| C   | -2.71198100  | -5.00663100 | 2.49822900  |
| C   | -2.60883000  | -4.27370500 | 1.32159200  |
| C   | -2.40549400  | -2.72254900 | -2.44496200 |
| C   | -2.19544600  | -3.44897400 | -3.61351600 |
| C   | -1.31936600  | -4.53558100 | -3.64488400 |
| C   | -0.65477000  | -4.86711800 | -2.46022100 |
| C   | -0.86370100  | -4.14738500 | -1.28973100 |
| C   | 2.60882100   | 4.27372200  | -1.32155000 |
| C   | 2.71196600   | 5.00666300  | -2.49817900 |
| C   | 2.12803000   | 4.55695100  | -3.68588700 |
| C   | 1.44500600   | 3.33961000  | -3.65104000 |
| C   | 1.33986400   | 2.60087300  | -2.47610500 |
| C   | -2.21177600  | -5.36913500 | 4.94709600  |
| C   | -1.11767800  | -5.33861200 | -4.89852500 |
| C   | 2.21173800   | 5.36919600  | -4.94703900 |
| C   | 1.11765700   | 5.33856400  | 4.89857100  |
| C   | 0.86369600   | 4.14736300  | 1.28977700  |
| C   | 0.65476600   | 4.86708200  | 2.46027000  |
| C   | 1.31937500   | 4.53554000  | 3.64493000  |
| C   | 2.19546800   | 3.44895000  | 3.61354500  |
| C   | 2.40551600   | 2.72253400  | 2.44498000  |
| C   | 1.74546400   | 3.06169100  | 1.26270400  |
| C   | -10.48900300 | -0.84807600 | -0.03968700 |
| C   | -11.47362500 | 0.11569000  | -0.03900900 |
| C   | -11.24189200 | 1.57264700  | -0.01637000 |
| C   | -12.57287400 | 2.20735400  | -0.02379100 |
| C   | -13.56926100 | 1.21637300  | -0.04902000 |
| C   | -12.90969300 | -0.11165400 | -0.06016200 |
| O   | -10.16245400 | 2.14319500  | 0.00466500  |
| C   | -13.58691400 | -1.31581800 | -0.08778600 |
| C   | -12.91726700 | 3.54782600  | -0.00969500 |
| C   | -14.25396000 | 3.92738400  | -0.01996300 |
| C   | -15.23477200 | 2.93980000  | -0.04455700 |
| C   | -14.91352600 | 1.58078100  | -0.05943500 |
| C   | 10.48900600  | 0.84807400  | 0.03964900  |
| C   | 11.47362800  | -0.11569100 | 0.03898200  |
| C   | 11.24189600  | -1.57264900 | 0.01635000  |
| C   | 12.57287800  | -2.20735500 | 0.02375700  |
| C   | 13.56926500  | -1.21637300 | 0.04897400  |
| C   | 12.90969600  | 0.11165400  | 0.06012700  |
| O   | 10.16245800  | -2.14319700 | -0.00467400 |
| C   | 13.58691600  | 1.31581800  | 0.08776400  |
| C   | 12.91727200  | -3.54782700 | 0.00965800  |
| C   | 14.25396600  | -3.92738400 | 0.01990800  |
| C   | 15.23477700  | -2.93979900 | 0.04448700  |
| C   | 14.91353100  | -1.58077900 | 0.05936900  |
| C   | 4.53434000   | 1.51241600  | -0.00274800 |
| C   | 5.22561500   | 0.28993700  | -0.01571600 |

|   |              |             |             |
|---|--------------|-------------|-------------|
| S | 4.14910900   | -1.07514100 | -0.03379700 |
| S | 5.59982200   | 2.89027700  | 0.02214900  |
| C | 6.98124200   | 1.81902600  | 0.02058300  |
| C | 6.62101500   | 0.46007100  | -0.00269000 |
| C | -4.53433800  | -1.51241800 | 0.00275000  |
| C | -5.22561300  | -0.28993900 | 0.01571800  |
| S | -4.14910700  | 1.07513900  | 0.03380800  |
| S | -5.59982000  | -2.89027900 | -0.02216500 |
| C | -6.98124000  | -1.81902800 | -0.02060600 |
| C | -6.62101300  | -0.46007300 | 0.00267800  |
| C | 8.35634200   | 2.01558500  | 0.03393500  |
| C | 9.07665900   | 0.81213300  | 0.02385900  |
| S | 7.99199300   | -0.58288100 | -0.00599200 |
| C | -8.35634000  | -2.01558700 | -0.03397200 |
| C | -9.07665700  | -0.81213500 | -0.02389000 |
| S | -7.99199100  | 0.58287800  | 0.00597900  |
| C | -12.95495100 | -2.59193600 | -0.10056400 |
| N | -12.48684600 | -3.65769400 | -0.11205600 |
| C | -15.00644400 | -1.42704300 | -0.10785800 |
| N | -16.15971700 | -1.58155400 | -0.12530200 |
| C | 12.95495200  | 2.59193500  | 0.10056800  |
| N | 12.48684800  | 3.65769300  | 0.11209000  |
| C | 15.00644600  | 1.42704400  | 0.10782700  |
| N | 16.15971900  | 1.58155700  | 0.12526300  |
| H | -1.00742600  | 2.30350900  | 0.00934000  |
| H | 1.00742800   | -2.30351100 | -0.00932900 |
| H | -0.80372800  | -1.65693300 | 2.48922500  |
| H | -0.98488200  | -2.95888400 | 4.55973800  |
| H | -3.25669400  | -5.94772400 | 2.49204500  |
| H | -3.06107200  | -4.66174500 | 0.41307200  |
| H | -3.08844500  | -1.87808200 | -2.46042000 |
| H | -2.72494900  | -3.16254100 | -4.51902700 |
| H | 0.03751200   | -5.70568300 | -2.45211000 |
| H | -0.34291600  | -4.44260700 | -0.38325900 |
| H | 3.06106800   | 4.66175200  | -0.41302700 |
| H | 3.25667600   | 5.94775700  | -2.49198600 |
| H | 0.98487000   | 2.95893000  | -4.55970600 |
| H | 0.80373100   | 1.65695400  | -2.48920800 |
| H | -2.07693200  | -4.74431400 | 5.83397800  |
| H | -3.17609800  | -5.87864600 | 5.03023400  |
| H | -1.43417500  | -6.14182600 | 4.96895300  |
| H | -1.80109200  | -6.19548400 | -4.93040000 |
| H | -1.30671000  | -4.73771900 | -5.79217400 |
| H | -0.09972700  | -5.73365400 | -4.95999900 |
| H | 1.43397400   | 6.14172000  | -4.96899000 |
| H | 3.17596200   | 5.87890900  | -5.03006400 |
| H | 2.07712800   | 4.74434600  | -5.83393700 |
| H | 0.09940100   | 5.73275400  | 4.96051400  |
| H | 1.30764800   | 4.73794900  | 5.79220000  |
| H | 1.80034700   | 6.19603000  | 4.92997500  |
| H | 0.34290300   | 4.44258700  | 0.38331000  |
| H | -0.03752600  | 5.70564000  | 2.45217000  |
| H | 2.72498400   | 3.16251800  | 4.51904800  |
| H | 3.08847900   | 1.87807600  | 2.46042800  |
| H | -10.83517700 | -1.87676400 | -0.05639600 |
| H | -15.71017600 | 0.85007600  | -0.07832500 |
| H | 10.83517900  | 1.87676300  | 0.05634300  |
| H | 15.71018000  | -0.85007400 | 0.07824500  |
| H | 8.85216300   | 2.97948600  | 0.05182200  |
| H | -8.85216100  | -2.97948800 | -0.05186800 |
| H | -14.51005000 | 4.98117300  | -0.00870200 |
| H | -16.27889700 | 3.23543100  | -0.05235700 |
| H | 16.27890200  | -3.23542900 | 0.05227200  |
| H | 14.51005600  | -4.98117200 | 0.00864600  |
| F | -11.97171000 | 4.48422000  | 0.01358900  |
| F | 11.97171500  | -4.48422100 | -0.01361000 |

## INIC3

|     |             |             |             |
|-----|-------------|-------------|-------------|
| 0 1 |             |             |             |
| C   | -0.77392400 | 1.15767800  | -0.01365300 |
| C   | -1.36927000 | -0.12636300 | -0.00791200 |
| C   | -0.60196800 | -1.29513600 | 0.00247800  |
| C   | 0.77391700  | -1.15776100 | 0.01295200  |
| C   | 1.36925700  | 0.12628300  | 0.00722600  |
| C   | 0.60195900  | 1.29505500  | -0.00317200 |
| C   | -1.83491500 | 2.26846000  | -0.01385000 |
| C   | 1.83492400  | -2.26853300 | 0.01314600  |
| C   | -2.79648100 | 0.08115600  | -0.00753800 |
| C   | -3.09935600 | 1.42758100  | 0.00520800  |

|   |              |             |             |
|---|--------------|-------------|-------------|
| C | 2.79646900   | -0.08122000 | 0.00694500  |
| C | 3.09935800   | -1.42764100 | -0.00577100 |
| C | -1.83334200  | 3.10322100  | -1.30198800 |
| C | -1.65581200  | 3.11798800  | 1.24924700  |
| C | 1.83327700   | -3.10340100 | 1.30121700  |
| C | -1.27076200  | 2.62485800  | -2.48666900 |
| C | -1.35923300  | 3.35976200  | -3.66546700 |
| C | -2.01185700  | 4.59345800  | -3.70612900 |
| C | -2.58243000  | 5.06408600  | -2.52001900 |
| C | -2.49563000  | 4.33518700  | -1.33961600 |
| C | -2.32300400  | 2.80726800  | 2.43532800  |
| C | -2.08950200  | 3.53644800  | 3.59777500  |
| C | -1.18215200  | 4.59731500  | 3.61897800  |
| C | -0.51078100  | 4.90033100  | 2.43047000  |
| C | -0.74314200  | 4.17800300  | 1.26605000  |
| C | 2.49546300   | -4.33542200 | 1.33876500  |
| C | 2.58219100   | -5.06440800 | 2.51912100  |
| C | 2.01164700   | -4.59381600 | 3.70525700  |
| C | 1.35913400   | -3.36005700 | 3.66467700  |
| C | 1.27073400   | -2.62506700 | 2.48592900  |
| C | -2.07752100  | 5.40064700  | -4.97158500 |
| C | -0.95438700  | 5.40386300  | 4.86588100  |
| C | 2.07721300   | -5.40110300 | 4.97065600  |
| C | 0.95476800   | -5.40358800 | -4.86687800 |
| C | 0.74320000   | -4.17793900 | -1.26700500 |
| C | 0.51094000   | -4.90018400 | -2.43148700 |
| C | 1.18245900   | -4.59711900 | -3.61991100 |
| C | 2.08984400   | -3.53629800 | -3.59854000 |
| C | 2.32325100   | -2.80719600 | -2.43601500 |
| C | 1.65592100   | -3.11795700 | -1.25003500 |
| C | -10.46096300 | 1.13711300  | 0.04726300  |
| C | -11.46623400 | 0.19531300  | 0.04431100  |
| C | -11.27473400 | -1.26532400 | 0.01768800  |
| C | -12.62061300 | -1.86992800 | 0.01766900  |
| C | -13.58584800 | -0.85501000 | 0.04507500  |
| C | -12.89942800 | 0.45583800  | 0.06378800  |
| O | -10.21911600 | -1.87996400 | -0.00136500 |
| C | -13.55064900 | 1.67332100  | 0.09605100  |
| C | -12.94044500 | -3.21761800 | -0.00514400 |
| C | -14.28433500 | -3.54459700 | 0.00016200  |
| C | -15.26218900 | -2.54395700 | 0.02794400  |
| C | -14.93932900 | -1.19714900 | 0.05047700  |
| C | 10.46097000  | -1.13706000 | -0.04669800 |
| C | 11.46622400  | -0.19524300 | -0.04367600 |
| C | 11.27469900  | 1.26538900  | -0.01693100 |
| C | 12.62057000  | 1.87001200  | -0.01665000 |
| C | 13.58582300  | 0.85511100  | -0.04408100 |
| C | 12.89942300  | -0.45574500 | -0.06303300 |
| O | 10.21907000  | 1.88001300  | 0.00202200  |
| C | 13.55066200  | -1.67321600 | -0.09542000 |
| C | 12.94037900  | 3.21770300  | 0.00638500  |
| C | 14.28426400  | 3.54470300  | 0.00128800  |
| C | 15.26213700  | 2.54408100  | -0.02651800 |
| C | 14.93930000  | 1.19727100  | -0.04927500 |
| C | 4.49025300   | -1.63868300 | -0.00095700 |
| C | 5.21531100   | -0.43588500 | 0.00742400  |
| S | 4.17779000   | 0.95882000  | 0.02339200  |
| S | 5.51690200   | -3.04566000 | -0.02399700 |
| C | 6.92761400   | -2.01351400 | -0.02664900 |
| C | 6.60519800   | -0.64514400 | -0.00653800 |
| C | -4.49024800  | 1.63864000  | 0.00052900  |
| C | -5.21532400  | 0.43585300  | -0.00777200 |
| S | -4.17782100  | -0.95886800 | -0.02385500 |
| S | -5.51687200  | 3.04563300  | 0.02382500  |
| C | -6.92759600  | 2.01350800  | 0.02670400  |
| C | -6.60520500  | 0.64513300  | 0.00648300  |
| C | 8.29691100   | -2.24822400 | -0.03982400 |
| C | 9.05003400   | -1.06528600 | -0.03193300 |
| S | 8.00415600   | 0.35944000  | -0.00516900 |
| C | -8.29688700  | 2.24824100  | 0.04011900  |
| C | -9.05003000  | 1.06531500  | 0.03232100  |
| S | -8.00418000  | -0.35942500 | 0.00535500  |
| F | -14.68183700 | -4.81269000 | -0.02082800 |
| F | -16.53797900 | -2.92003900 | 0.03202100  |
| F | 16.53792100  | 2.92018300  | -0.03039000 |
| F | 14.68174500  | 4.81279800  | 0.02250600  |
| C | -12.89417700 | 2.93673200  | 0.11686100  |
| N | -12.40470100 | 3.99262500  | 0.13492900  |
| C | -14.96859100 | 1.80262500  | 0.11362900  |
| N | -16.12153800 | 1.95928600  | 0.12911700  |
| C | 12.89420300  | -2.93663000 | -0.11646100 |

|   |              |             |             |
|---|--------------|-------------|-------------|
| N | 12.40474600  | -3.99252800 | -0.13471000 |
| C | 14.96860600  | -1.80250300 | -0.11289600 |
| N | 16.12155400  | -1.95916400 | -0.12830100 |
| H | -1.07115700  | -2.27437600 | 0.00043300  |
| H | 1.07114500   | 2.27429700  | -0.00110500 |
| H | -0.75843700  | 1.66777000  | -2.49560800 |
| H | -0.91003100  | 2.96290000  | -4.57268100 |
| H | -3.10337000  | 6.01855300  | -2.51809200 |
| H | -2.93656100  | 4.73965100  | -0.43270900 |
| H | -3.03024900  | 1.98320700  | 2.45866000  |
| H | -2.62522800  | 3.27275900  | 4.50651600  |
| H | 0.20535200   | 5.71849800  | 2.41456000  |
| H | -0.21637900  | 4.45113000  | 0.35609600  |
| H | 2.93637700   | -4.73985700 | 0.43183600  |
| H | 3.10305400   | -6.01891800 | 2.51713400  |
| H | 0.90996400   | -2.96321600 | 4.57191700  |
| H | 0.75849800   | -1.66793100 | 2.49493000  |
| H | -1.95912900  | 4.76801700  | -5.85526300 |
| H | -3.02928600  | 5.93298900  | -5.05625500 |
| H | -1.28145600  | 6.15413400  | -4.99850600 |
| H | -1.61242900  | 6.28054500  | 4.89234500  |
| H | -1.15884000  | 4.81576200  | 5.76462100  |
| H | 0.07477600   | 5.76952300  | 4.92214300  |
| H | 1.28090800   | -6.15433400 | 4.99762900  |
| H | 3.02881900   | -5.93375200 | 5.05517800  |
| H | 1.95912500   | -4.76848900 | 5.85438800  |
| H | -0.07470900  | -5.76827600 | -4.92378700 |
| H | 1.16037200   | -4.81578200 | -5.76554500 |
| H | 1.61198100   | -6.28090800 | -4.89279700 |
| H | 0.21633300   | -4.45110400 | -0.35712300 |
| H | -0.20523100  | -5.71832100 | -2.41571000 |
| H | 2.62568900   | -3.27257400 | -4.50720100 |
| H | 3.03053100   | -1.98316300 | -2.45922800 |
| H | -10.78319900 | 2.17361200  | 0.06398700  |
| H | -12.17584600 | -3.98661600 | -0.02642500 |
| H | -15.74724100 | -0.47761400 | 0.07074000  |
| H | 10.78322500  | -2.17355400 | -0.06337300 |
| H | 12.17576500  | 3.98668600  | 0.02767400  |
| H | 15.74722500  | 0.47775200  | -0.06954500 |
| H | 8.76571000   | -3.22560800 | -0.05552400 |
| H | -8.76566800  | 3.22563200  | 0.05591900  |

## IPIC

|     |             |             |             |
|-----|-------------|-------------|-------------|
| 0 1 |             |             |             |
| C   | 12.46777600 | 3.39962300  | -0.19575200 |
| C   | 13.47026700 | 2.41900300  | -0.20742800 |
| C   | 14.80723300 | 2.81522700  | -0.24050400 |
| C   | 15.09634400 | 4.18059600  | -0.26053600 |
| C   | 14.08635100 | 5.14406200  | -0.24861400 |
| C   | 12.74855400 | 4.75471100  | -0.21581600 |
| C   | 11.14542400 | 2.74285400  | -0.15845300 |
| C   | 11.39074200 | 1.29125400  | -0.14676900 |
| C   | 12.82816700 | 1.08302200  | -0.17865900 |
| C   | 13.52408400 | -0.11366900 | -0.18345100 |
| O   | 10.06504100 | 3.31588800  | -0.14036000 |
| C   | -0.98010200 | 0.99660500  | 0.37733100  |
| C   | -1.31776100 | -0.37456200 | 0.34662000  |
| C   | -0.34802000 | -1.38199800 | 0.34944200  |
| C   | 0.98010300  | -0.99663300 | 0.37728100  |
| C   | 1.31776200  | 0.37453500  | 0.34666800  |
| C   | 0.34802100  | 1.38197100  | 0.34954200  |
| C   | -2.24468900 | 1.88229100  | 0.37846600  |
| C   | 2.24468900  | -1.88232000 | 0.37838000  |
| C   | -6.55627300 | -0.63065300 | -0.01537400 |
| C   | -6.94217200 | 0.73012600  | -0.00670200 |
| C   | -8.31718900 | 0.90720200  | -0.03924300 |
| C   | -9.01342500 | -0.31489900 | -0.07452700 |
| S   | -7.90494600 | -1.70092500 | -0.06711100 |
| N   | -5.82794900 | 1.54337400  | 0.05780200  |
| C   | -2.75204200 | -0.44522800 | 0.25529700  |
| C   | -3.32315900 | 0.81290100  | 0.23184800  |
| C   | -4.73087700 | 0.71289300  | 0.09531700  |
| C   | -5.16462000 | -0.63782800 | 0.04279100  |
| S   | -3.85602400 | -1.77339300 | 0.13368500  |
| C   | -5.88442200 | 2.99777000  | 0.01823600  |
| C   | 6.55627800  | 0.63064900  | -0.01525700 |
| C   | 6.94217800  | -0.73013000 | -0.00666900 |
| C   | 8.31719500  | -0.90720300 | -0.03921500 |

|   |              |             |             |
|---|--------------|-------------|-------------|
| C | 9.01343100   | 0.31490000  | -0.07442300 |
| S | 7.90495000   | 1.70092600  | -0.06692500 |
| N | 5.82795500   | -1.54338300 | 0.05777400  |
| C | 2.75204500   | 0.44520700  | 0.25537000  |
| C | 3.32316200   | -0.81292100 | 0.23184700  |
| C | 4.73088200   | -0.71290400 | 0.09533600  |
| C | 5.16462500   | 0.63782000  | 0.04289800  |
| S | 3.85602800   | 1.77337900  | 0.13384700  |
| C | 5.88443100   | -2.99777700 | 0.01812600  |
| C | -2.21863500  | 2.80844000  | -0.84927200 |
| C | -2.34249200  | 2.60616600  | 1.73185400  |
| C | 2.34246900   | -2.60627700 | 1.73172600  |
| C | -2.24233500  | 4.19873900  | -0.77965400 |
| C | -2.19094100  | 4.97394400  | -1.94062500 |
| C | -2.12641800  | 4.39119100  | -3.20381200 |
| C | -2.11494100  | 2.99131000  | -3.26995000 |
| C | -2.15538700  | 2.21845700  | -2.11998600 |
| C | -3.35951700  | 2.32728400  | 2.64639600  |
| C | -3.41068100  | 2.95906300  | 3.88840700  |
| C | -2.44768500  | 3.89058100  | 4.26957600  |
| C | -1.42118400  | 4.16421800  | 3.35849400  |
| C | -1.36720700  | 3.53622900  | 2.12225800  |
| C | 1.36714700   | -3.53632500 | 2.12207900  |
| C | 1.42111100   | -4.16440000 | 3.35826900  |
| C | 2.44763200   | -3.89086200 | 4.26936300  |
| C | 3.41066700   | -2.95936800 | 3.88824200  |
| C | 3.35951500   | -2.32750200 | 2.64627200  |
| C | -2.06400800  | 5.22247600  | -4.45344900 |
| C | -2.50404700  | 4.58345200  | 5.60105300  |
| C | 2.50391900   | -4.58376500 | 5.60082600  |
| C | -5.81731200  | 3.62639500  | -1.38458300 |
| C | -6.62579700  | 2.85877200  | -2.42616300 |
| C | 5.81735600   | -3.62632300 | -1.38473000 |
| C | 6.62587200   | -2.85864800 | -2.42624600 |
| C | 2.06406400   | -5.22223000 | -4.45372700 |
| C | 2.24232400   | -4.19869900 | -0.77987200 |
| C | 2.19094600   | -4.97383900 | -1.94088700 |
| C | 2.12646700   | -4.39101500 | -3.20404400 |
| C | 2.11501800   | -2.99112900 | -3.27010300 |
| C | 2.15544800   | -2.21834100 | -2.12009500 |
| C | 2.21865200   | -2.80839600 | -0.84941400 |
| C | 10.42042100  | 0.30751300  | -0.10953100 |
| C | -10.42041600 | -0.30750600 | -0.10963300 |
| C | -12.46779900 | -3.39959600 | -0.19597400 |
| C | -13.47028100 | -2.41896600 | -0.20760000 |
| C | -14.80725100 | -2.81517600 | -0.24066700 |
| C | -15.09637400 | -4.18054200 | -0.26074100 |
| C | -14.08639000 | -5.14401800 | -0.24887000 |
| C | -12.74858900 | -4.75468100 | -0.21608100 |
| C | -11.14544000 | -2.74284100 | -0.15867200 |
| C | -11.39074300 | -1.29124000 | -0.14691900 |
| C | -12.82816700 | -1.08299300 | -0.17879200 |
| C | -13.52406800 | 0.11370700  | -0.18354100 |
| O | -10.06506200 | -3.31588700 | -0.14061200 |
| C | 12.91498800  | -1.39992100 | -0.15646100 |
| N | 12.46623600  | -2.47430000 | -0.13494300 |
| C | 14.94453400  | -0.19981200 | -0.21663300 |
| N | 16.10063500  | -0.33344900 | -0.24299400 |
| C | -5.35039300  | 8.36254900  | 0.57297300  |
| C | -6.05531500  | 7.44330000  | -0.41618300 |
| C | -5.58204400  | 5.99507500  | -0.32877700 |
| C | -6.29818700  | 5.08296400  | -1.32145100 |
| C | 5.35035100   | -8.36258500 | 0.57254700  |
| C | 6.05531100   | -7.44328300 | -0.41653200 |
| C | 5.58204000   | -5.99506100 | -0.32906500 |
| C | 6.29822100   | -5.08289900 | -1.32166400 |
| C | -12.91495400 | 1.39994900  | -0.15651700 |
| N | -12.46618200 | 2.47432000  | -0.13497700 |
| C | -14.94451800 | 0.19987100  | -0.21670600 |
| N | -16.10061700 | 0.33352900  | -0.24304900 |
| H | 15.62096400  | 2.10215200  | -0.25064200 |
| H | 11.94004000  | 5.47904300  | -0.20565300 |
| H | -0.64196200  | -2.42503400 | 0.29416200  |
| H | 0.64196500   | 2.42501100  | 0.29433900  |
| H | -8.84024800  | 1.85658000  | -0.03730300 |
| H | -6.82403400  | 3.28099600  | 0.50707100  |
| H | -5.07579400  | 3.38003000  | 0.64672900  |
| H | 8.84025500   | -1.85658100 | -0.03733400 |
| H | 6.82403100   | -3.28103000 | 0.50696700  |
| H | 5.07578800   | -3.38007400 | 0.64657700  |
| H | -2.31167400  | 4.69806700  | 0.18053800  |

|   |              |             |             |
|---|--------------|-------------|-------------|
| H | -2.20777900  | 6.05771400  | -1.85224800 |
| H | -2.07061900  | 2.50113500  | -4.23968600 |
| H | -2.14046600  | 1.13480100  | -2.20584400 |
| H | -4.12201500  | 1.59381900  | 2.40682100  |
| H | -4.21783400  | 2.71208800  | 4.57359300  |
| H | -0.64618200  | 4.87929600  | 3.62384300  |
| H | -0.55043200  | 3.78423200  | 1.45320600  |
| H | 0.55036100   | -3.78425600 | 1.45301400  |
| H | 0.64608600   | -4.87947000 | 3.62357300  |
| H | 4.21784700   | -2.71248600 | 4.57342900  |
| H | 4.12205000   | -1.59406200 | 2.40673400  |
| H | -2.19189200  | 6.28510300  | -4.23281600 |
| H | -1.10099100  | 5.09939500  | -4.96150300 |
| H | -2.84162600  | 4.92748900  | -5.16556400 |
| H | -2.73278600  | 5.64856000  | 5.48201000  |
| H | -3.27184300  | 4.14783600  | 6.24515000  |
| H | -1.54427600  | 4.51789100  | 6.12346100  |
| H | 2.73140300   | -5.64912900 | 5.48170100  |
| H | 3.27251100   | -4.14896600 | 6.24452300  |
| H | 1.54448600   | -4.51712000 | 6.12372600  |
| H | -4.76670900  | 3.61951500  | -1.70117200 |
| H | -6.51617500  | 3.33517500  | -3.40540400 |
| H | -6.29104600  | 1.82200000  | -2.52267700 |
| H | -7.69475000  | 2.84959900  | -2.18368100 |
| H | 4.76676200   | -3.61942000 | -1.70134800 |
| H | 6.51627600   | -3.33499900 | -3.40551600 |
| H | 6.29112700   | -1.82187000 | -2.52271500 |
| H | 7.69481900   | -2.84949100 | -2.18373300 |
| H | 2.19203700   | -6.28486100 | -4.23316200 |
| H | 1.10101200   | -5.09919300 | -4.96172700 |
| H | 2.84162500   | -4.92714200 | -5.16586100 |
| H | 2.31162900   | -4.69808200 | 0.18029400  |
| H | 2.20776300   | -6.05761400 | -1.85257000 |
| H | 2.07073200   | -2.50090000 | -4.23981300 |
| H | 2.14055000   | -1.13467900 | -2.20589300 |
| H | 10.78877100  | -0.71353500 | -0.10451900 |
| H | -10.78876200 | 0.71354400  | -0.10456400 |
| H | -15.62097500 | -2.10209400 | -0.25076500 |
| H | -11.94008200 | -5.47902100 | -0.20595700 |
| H | -5.70964500  | 9.39303100  | 0.49061600  |
| H | -5.51624600  | 8.03392000  | 1.60495600  |
| H | -4.26820500  | 8.37280300  | 0.40095700  |
| H | -5.89831600  | 7.81163500  | -1.43892400 |
| H | -7.13965800  | 7.48023000  | -0.24523200 |
| H | -5.73192700  | 5.63799800  | 0.69931100  |
| H | -4.50051500  | 5.95528200  | -0.51176800 |
| H | -6.20048800  | 5.51215500  | -2.32786400 |
| H | -7.37620300  | 5.08431900  | -1.09868300 |
| H | 5.70960300   | -9.39306300 | 0.49014600  |
| H | 5.51616700   | -8.03401300 | 1.60455400  |
| H | 4.26816900   | -8.37282700 | 0.40049100  |
| H | 5.89834900   | -7.81156200 | -1.43930000 |
| H | 7.13964800   | -7.48022500 | -0.24554400 |
| H | 5.73188900   | -5.63804100 | 0.69904800  |
| H | 4.50051800   | -5.95525700 | -0.51209100 |
| H | 6.20055200   | -5.51203300 | -2.32786400 |
| H | 7.37623000   | -5.08427100 | -1.09886200 |
| H | -14.34728900 | -6.19766700 | -0.26515700 |
| H | -16.13481200 | -4.49630700 | -0.28615800 |
| H | 16.13477800  | 4.49637100  | -0.28595900 |
| H | 14.34723900  | 6.19771300  | -0.26486800 |

## IPIC-4F

|   |             |             |             |
|---|-------------|-------------|-------------|
| 0 | 1           |             |             |
| C | 12.64276000 | 2.67423600  | -0.03929300 |
| C | 13.58848100 | 1.64167600  | -0.01948900 |
| C | 14.94758000 | 1.95851900  | -0.02048400 |
| C | 15.29582900 | 3.29975400  | -0.04126500 |
| C | 14.33753300 | 4.31781900  | -0.06095800 |
| C | 12.98724700 | 4.01523500  | -0.06014900 |
| C | 11.28495700 | 2.09257600  | -0.03338100 |
| C | 11.45053700 | 0.63131000  | -0.01020500 |
| C | 12.87373900 | 0.34378700  | 0.00017100  |
| C | 13.50638300 | -0.88681900 | 0.02587700  |
| O | 10.24213000 | 2.73013400  | -0.04611400 |
| C | -0.91918800 | 1.05324900  | 0.27248300  |
| C | -1.33752600 | -0.29550200 | 0.24665100  |
| C | -0.42946300 | -1.35887900 | 0.24617100  |
| C | 0.91918800  | -1.05326000 | 0.27243200  |

|   |              |             |             |
|---|--------------|-------------|-------------|
| C | 1.33752600   | 0.29549200  | 0.24669100  |
| C | 0.42946400   | 1.35886900  | 0.24626300  |
| C | -2.12860700  | 2.01324000  | 0.27835700  |
| C | 2.12860600   | -2.01325200 | 0.27826800  |
| C | -6.58690200  | -0.24599100 | -0.00662500 |
| C | -6.89311900  | 1.13537000  | 0.00562200  |
| C | -8.25525900  | 1.39202000  | 0.00644100  |
| C | -9.02233300  | 0.21151200  | -0.00593900 |
| S | -7.99539800  | -1.23665600 | -0.02060300 |
| N | -5.73221600  | 1.88241900  | 0.03903300  |
| C | -2.77435600  | -0.28141200 | 0.17555400  |
| C | -3.27117000  | 1.00833900  | 0.15959400  |
| C | -4.68484300  | 0.98987700  | 0.05407500  |
| C | -5.19747900  | -0.33389700 | 0.01756700  |
| S | -3.95557000  | -1.54367200 | 0.08303100  |
| C | -5.70516300  | 3.33748500  | -0.00843000 |
| C | 6.58690600   | 0.24599700  | -0.00652800 |
| C | 6.89312400   | -1.13536400 | 0.00564200  |
| C | 8.25526300   | -1.39201300 | 0.00645900  |
| C | 9.02233700   | -0.21150500 | -0.00585000 |
| S | 7.99540100   | 1.23666400  | -0.02044500 |
| N | 5.73222000   | -1.88241600 | 0.03899700  |
| C | 2.77435800   | 0.28140600  | 0.17561500  |
| C | 3.27117200   | -1.00834300 | 0.15958600  |
| C | 4.68484600   | -0.98987600 | 0.05408400  |
| C | 5.19748300   | 0.33390100  | 0.01765800  |
| S | 3.95557200   | 1.54367200  | 0.08317700  |
| C | 5.70517100   | -3.33748000 | -0.00853400 |
| C | -2.06740900  | 2.91925700  | -0.96404300 |
| C | -2.16102900  | 2.76055700  | 1.62143100  |
| C | 2.16100300   | -2.76065200 | 1.62129600  |
| C | -2.02769300  | 4.31014400  | -0.91527800 |
| C | -1.95137900  | 5.06540400  | -2.08784000 |
| C | -1.92425100  | 4.46215000  | -3.34270900 |
| C | -1.97780500  | 3.06249000  | -3.38798500 |
| C | -2.04284700  | 2.30892500  | -2.22637200 |
| C | -3.16469400  | 2.53939400  | 2.56590000  |
| C | -3.15557200  | 3.19024900  | 3.79906600  |
| C | -2.14338700  | 4.08401400  | 4.14152200  |
| C | -1.13004400  | 4.29900800  | 3.20059900  |
| C | -1.13620500  | 3.65214600  | 1.97299000  |
| C | 1.13616400   | -3.65225300 | 1.97278700  |
| C | 1.12998900   | -4.29920400 | 3.20034600  |
| C | 2.14332900   | -4.08428600 | 4.14129400  |
| C | 3.15553000   | -3.19051800 | 3.79890400  |
| C | 3.16466600   | -2.53957200 | 2.56578300  |
| C | -1.83201600  | 5.27175300  | -4.60461300 |
| C | -2.13630200  | 4.79866500  | 5.46253400  |
| C | 2.13617600   | -4.79897900 | 5.46228300  |
| C | -5.63821400  | 3.95335900  | -1.41712200 |
| C | -6.51467500  | 3.22629100  | -2.43258500 |
| C | 5.63824600   | -3.95329100 | -1.41725500 |
| C | 6.51473700   | -3.22619100 | -2.43266800 |
| C | 1.83209700   | -5.27148400 | -4.60489500 |
| C | 2.02770000   | -4.31008400 | -0.91550200 |
| C | 1.95140700   | -5.06527700 | -2.08810700 |
| C | 1.92431000   | -4.46195300 | -3.34294300 |
| C | 1.97787600   | -3.06229100 | -3.38813900 |
| C | 2.04289800   | -2.30879100 | -2.22648200 |
| C | 2.06742800   | -2.91919400 | -0.96418800 |
| C | 10.42585300  | -0.29822000 | -0.00218200 |
| C | -10.42584900 | 0.29822700  | -0.00227500 |
| C | -12.64275000 | -2.67423000 | -0.03950600 |
| C | -13.58847300 | -1.64167300 | -0.01965700 |
| C | -14.94757200 | -1.95851900 | -0.02065200 |
| C | -15.29581800 | -3.29975500 | -0.04147800 |
| C | -14.33752000 | -4.31781700 | -0.06121800 |
| C | -12.98723500 | -4.01523000 | -0.06040900 |
| C | -11.28494900 | -2.09256800 | -0.03357700 |
| C | -11.45053200 | -0.63130400 | -0.01034600 |
| C | -12.87373400 | -0.34378400 | 0.00004200  |
| C | -13.50638400 | 0.88681900  | 0.02578100  |
| O | -10.24212000 | -2.73012300 | -0.04634900 |
| C | 12.83057100  | -2.13920300 | 0.04808600  |
| N | 12.32529200  | -3.18806400 | 0.06708700  |
| C | 14.92119900  | -1.04035300 | 0.03431100  |
| N | 16.07160400  | -1.21787600 | 0.04217000  |
| C | -4.85714900  | 8.67147600  | 0.48434700  |
| C | -5.65001200  | 7.78238400  | -0.46500400 |
| C | -5.23644400  | 6.31498800  | -0.39535200 |
| C | -6.03606800  | 5.43459600  | -1.35222500 |



|   |              |             |             |
|---|--------------|-------------|-------------|
| C | 4.85706800   | -8.67147700 | 0.48399500  |
| C | 5.64996400   | -7.78235600 | -0.46530100 |
| C | 5.23641700   | -6.31495700 | -0.39559600 |
| C | 6.03607700   | -5.43453700 | -1.35241200 |
| C | -12.83057700 | 2.13920600  | 0.04801500  |
| N | -12.32530700 | 3.18807100  | 0.06702700  |
| C | -14.92119900 | 1.04034700  | 0.03422700  |
| N | -16.07160600 | 1.21786100  | 0.04209500  |
| H | 15.74206000  | 1.22403800  | -0.00624400 |
| H | 12.23672800  | 4.79818500  | -0.07518400 |
| H | -0.78497500  | -2.38256800 | 0.19598500  |
| H | 0.78497700   | 2.38256100  | 0.19614600  |
| H | -8.72098200  | 2.37072100  | 0.01730100  |
| H | -6.61401000  | 3.67724600  | 0.50209400  |
| H | -4.85992900  | 3.67449800  | 0.59730600  |
| H | 8.72098700   | -2.37071400 | 0.01727000  |
| H | 6.61401100   | -3.67726200 | 0.50198900  |
| H | 4.85992900   | -3.67452200 | 0.59717300  |
| H | -2.06601000  | 4.82638300  | 0.03757300  |
| H | -1.91845300  | 6.14996600  | -2.01525800 |
| H | -1.96525400  | 2.55682400  | -4.35064900 |
| H | -2.07842500  | 1.22463000  | -2.29680200 |
| H | -3.96473700  | 1.83699100  | 2.35707700  |
| H | -3.95450200  | 2.98829100  | 4.50823100  |
| H | -0.31766700  | 4.98288700  | 3.43461900  |
| H | -0.32808300  | 3.85656700  | 1.27905900  |
| H | 0.32804900   | -3.85662300 | 1.27883300  |
| H | 0.31760800   | -4.98309800 | 3.43430800  |
| H | 3.95446700   | -2.98863300 | 4.50808100  |
| H | 3.96472800   | -1.83717500 | 2.35701000  |
| H | -1.94134200  | 6.34012200  | -4.40236400 |
| H | -0.86547400  | 5.12247100  | -5.09902500 |
| H | -2.60664000  | 4.98017900  | -5.32116100 |
| H | -2.33659900  | 5.86829800  | 5.33295900  |
| H | -2.89631700  | 4.39718300  | 6.13738900  |
| H | -1.16293400  | 4.71201800  | 5.95580600  |
| H | 2.33530700   | -5.86881100 | 5.33257900  |
| H | 2.89691600   | -4.39827800 | 6.13678300  |
| H | 1.16313500   | -4.71135300 | 5.95603800  |
| H | -4.59797000  | 3.88549400  | -1.75963600 |
| H | -6.40412500  | 3.69077500  | -3.41739500 |
| H | -6.24052300  | 2.17203800  | -2.53109900 |
| H | -7.57585000  | 3.27787300  | -2.16285900 |
| H | 4.59800900   | -3.88539800 | -1.75978800 |
| H | 6.40420600   | -3.69063500 | -3.41749900 |
| H | 6.24059700   | -2.17193200 | -2.53114700 |
| H | 7.57590500   | -3.27779300 | -2.16292000 |
| H | 1.94142100   | -6.33986400 | -4.40270500 |
| H | 0.86556100   | -5.12217500 | -5.09931300 |
| H | 2.60673100   | -4.97986800 | -5.32141400 |
| H | 2.06598900   | -4.82637600 | 0.03732100  |
| H | 1.91847000   | -6.14984300 | -2.01558700 |
| H | 1.96534900   | -2.55657100 | -4.35077500 |
| H | 2.07848600   | -1.22449200 | -2.29685000 |
| H | 10.73795400  | -1.33779400 | 0.01021900  |
| H | -10.73795000 | 1.33780100  | 0.01017600  |
| H | -15.74205300 | -1.22404100 | -0.00637800 |
| H | -12.23671400 | -4.79817700 | -0.07547900 |
| H | -5.17374500  | 9.71679100  | 0.41514000  |
| H | -4.98647400  | 8.35294100  | 1.52469200  |
| H | -3.78537600  | 8.63281200  | 0.25931800  |
| H | -5.52837300  | 8.14193100  | -1.49563000 |
| H | -6.72180600  | 7.86667100  | -0.24032700 |
| H | -5.35454400  | 5.96565500  | 0.63946800  |
| H | -4.16712400  | 6.22825000  | -0.62744400 |
| H | -5.95174200  | 5.84959300  | -2.36546300 |
| H | -7.10378500  | 5.49632500  | -1.09141200 |
| H | 5.17364800   | -9.71679400 | 0.41474900  |
| H | 4.98637800   | -8.35299000 | 1.52435800  |
| H | 3.78530000   | -8.63278500 | 0.25894800  |
| H | 5.52834200   | -8.14185800 | -1.49594500 |
| H | 6.72175200   | -7.86666900 | -0.24060600 |
| H | 5.35449700   | -5.96567000 | 0.63924200  |
| H | 4.16710300   | -6.22819300 | -0.62771100 |
| H | 5.95177100   | -5.84948900 | -2.36567000 |
| H | 7.10378700   | -5.49629100 | -1.09157400 |
| F | -14.75780600 | -5.57961200 | -0.08065100 |
| F | -16.57969100 | -3.65096400 | -0.04328300 |
| F | 16.57970200  | 3.65096100  | -0.04306900 |
| F | 14.75782200  | 5.57961400  | -0.08034900 |

# IPIC-4CI

|   |   |              |             |             |
|---|---|--------------|-------------|-------------|
| 0 | 1 |              |             |             |
| C |   | 12.64276000  | 2.67423600  | -0.03929300 |
| C |   | 13.58848100  | 1.64167600  | -0.01948900 |
| C |   | 14.94758000  | 1.95851900  | -0.02048400 |
| C |   | 15.29582900  | 3.29975400  | -0.04126500 |
| C |   | 14.33753300  | 4.31781900  | -0.06095800 |
| C |   | 12.98724700  | 4.01523500  | -0.06014900 |
| C |   | 11.28495700  | 2.09257600  | -0.03338100 |
| C |   | 11.45053700  | 0.63131000  | -0.01020500 |
| C |   | 12.87373900  | 0.34378700  | 0.00017100  |
| C |   | 13.50638300  | -0.88681900 | 0.02587700  |
| O |   | 10.24213000  | 2.73013400  | -0.04611400 |
| C |   | -0.91918800  | 1.05324900  | 0.27248300  |
| C |   | -1.33752600  | -0.29550200 | 0.24665100  |
| C |   | -0.42946300  | -1.35887900 | 0.24617100  |
| C |   | 0.91918800   | -1.05326000 | 0.27243200  |
| C |   | 1.33752600   | 0.29549200  | 0.24669100  |
| C |   | 0.42946400   | 1.35886900  | 0.24626300  |
| C |   | -2.12860700  | 2.01324000  | 0.27835700  |
| C |   | 2.12860600   | -2.01325200 | 0.27826800  |
| C |   | -6.58690200  | -0.24599100 | -0.00662500 |
| C |   | -6.89311900  | 1.13537000  | 0.00562200  |
| C |   | -8.25525900  | 1.39202000  | 0.00644100  |
| C |   | -9.02233300  | 0.21151200  | -0.00593900 |
| S |   | -7.99539800  | -1.23665600 | -0.02060300 |
| N |   | -5.73221600  | 1.88241900  | 0.03903300  |
| C |   | -2.77435600  | -0.28141200 | 0.17555400  |
| C |   | -3.27117000  | 1.00833900  | 0.15959400  |
| C |   | -4.68484300  | 0.98987700  | 0.05407500  |
| C |   | -5.19747900  | -0.33389700 | 0.01756700  |
| S |   | -3.95557000  | -1.54367200 | 0.08303100  |
| C |   | -5.70516300  | 3.33748500  | -0.00843000 |
| C |   | 6.58690600   | 0.24599700  | -0.00652800 |
| C |   | 6.89312400   | -1.13536400 | 0.00564200  |
| C |   | 8.25526300   | -1.39201300 | 0.00645900  |
| C |   | 9.02233700   | -0.21150500 | -0.00585000 |
| S |   | 7.99540100   | 1.23666400  | -0.02044500 |
| N |   | 5.73222000   | -1.88241600 | 0.03899700  |
| C |   | 2.77435800   | 0.28140600  | 0.17561500  |
| C |   | 3.27117200   | -1.00834300 | 0.15958600  |
| C |   | 4.68484600   | -0.98987600 | 0.05408400  |
| C |   | 5.19748300   | 0.33390100  | 0.01765800  |
| S |   | 3.95557200   | 1.54367200  | 0.08317700  |
| C |   | 5.70517100   | -3.33748000 | -0.00853400 |
| C |   | -2.06740900  | 2.91925700  | -0.96404300 |
| C |   | -2.16102900  | 2.76055700  | 1.62143100  |
| C |   | 2.16100300   | -2.76065200 | 1.62129600  |
| C |   | -2.02769300  | 4.31014400  | -0.91527800 |
| C |   | -1.95137900  | 5.06540400  | -2.08784000 |
| C |   | -1.92425100  | 4.46215000  | -3.34270900 |
| C |   | -1.97780500  | 3.06249000  | -3.38798500 |
| C |   | -2.04284700  | 2.30892500  | -2.22637200 |
| C |   | -3.16469400  | 2.53939400  | 2.56590000  |
| C |   | -3.15557200  | 3.19024900  | 3.79906600  |
| C |   | -2.14338700  | 4.08401400  | 4.14152200  |
| C |   | -1.13004400  | 4.29900800  | 3.20059900  |
| C |   | -1.13620500  | 3.65214600  | 1.97299000  |
| C |   | 1.13616400   | -3.65225300 | 1.97278700  |
| C |   | 1.12998900   | -4.29920400 | 3.20034600  |
| C |   | 2.14332900   | -4.08428600 | 4.14129400  |
| C |   | 3.15553000   | -3.19051800 | 3.79890400  |
| C |   | 3.16466600   | -2.53957200 | 2.56578300  |
| C |   | -1.83201600  | 5.27175300  | -4.60461300 |
| C |   | -2.13630200  | 4.79866500  | 5.46253400  |
| C |   | 2.13617600   | -4.79897900 | 5.46228300  |
| C |   | -5.63821400  | 3.95335900  | -1.41712200 |
| C |   | -6.51467500  | 3.22629100  | -2.43258500 |
| C |   | 5.63824600   | -3.95329100 | -1.41725500 |
| C |   | 6.51473700   | -3.22619100 | -2.43266800 |
| C |   | 1.83209700   | -5.27148400 | -4.60489500 |
| C |   | 2.02770000   | -4.31008400 | -0.91550200 |
| C |   | 1.95140700   | -5.06527700 | -2.08810700 |
| C |   | 1.92431000   | -4.46195300 | -3.34294300 |
| C |   | 1.97787600   | -3.06229100 | -3.38813900 |
| C |   | 2.04289800   | -2.30879100 | -2.22648200 |
| C |   | 2.06742800   | -2.91919400 | -0.96418800 |
| C |   | 10.42585300  | -0.29822000 | -0.00218200 |
| C |   | -10.42584900 | 0.29822700  | -0.00227500 |

|   |              |             |             |
|---|--------------|-------------|-------------|
| C | -12.64275000 | -2.67423000 | -0.03950600 |
| C | -13.58847300 | -1.64167300 | -0.01965700 |
| C | -14.94757200 | -1.95851900 | -0.02065200 |
| C | -15.29581800 | -3.29975500 | -0.04147800 |
| C | -14.33752000 | -4.31781700 | -0.06121800 |
| C | -12.98723500 | -4.01523000 | -0.06040900 |
| C | -11.28494900 | -2.09256800 | -0.03357700 |
| C | -11.45053200 | -0.63130400 | -0.01034600 |
| C | -12.87373400 | -0.34378400 | 0.00004200  |
| C | -13.50638400 | 0.88681900  | 0.02578100  |
| O | -10.24212000 | -2.73012300 | -0.04634900 |
| C | 12.83057100  | -2.13920300 | 0.04808600  |
| N | 12.32529200  | -3.18806400 | 0.06708700  |
| C | 14.92119900  | -1.04035300 | 0.03431100  |
| N | 16.07160400  | -1.21787600 | 0.04217000  |
| C | -4.85714900  | 8.67147600  | 0.48434700  |
| C | -5.65001200  | 7.78238400  | -0.46500400 |
| C | -5.23644400  | 6.31498800  | -0.39535200 |
| C | -6.03606800  | 5.43459600  | -1.35222500 |
| C | 4.85706800   | -8.67147700 | 0.48399500  |
| C | 5.64996400   | -7.78235600 | -0.46530100 |
| C | 5.23641700   | -6.31495700 | -0.39559600 |
| C | 6.03607700   | -5.43453700 | -1.35241200 |
| C | -12.83057700 | 2.13920600  | 0.04801500  |
| N | -12.32530700 | 3.18807100  | 0.06702700  |
| C | -14.92119900 | 1.04034700  | 0.03422700  |
| N | -16.07160600 | 1.21786100  | 0.04209500  |
| H | 15.74206000  | 1.22403800  | -0.00624400 |
| H | 12.23672800  | 4.79818500  | -0.07518400 |
| H | -0.78497500  | -2.38256800 | 0.19598500  |
| H | 0.78497700   | 2.38256100  | 0.19614600  |
| H | -8.72098200  | 2.37072100  | 0.01730100  |
| H | -6.61401000  | 3.67724600  | 0.50209400  |
| H | -4.85992900  | 3.67449800  | 0.59730600  |
| H | 8.72098700   | -2.37071400 | 0.01727000  |
| H | 6.61401100   | -3.67726200 | 0.50198900  |
| H | 4.85992900   | -3.67452200 | 0.59717300  |
| H | -2.06601000  | 4.82638300  | 0.03757300  |
| H | -1.91845300  | 6.14996600  | -2.01525800 |
| H | -1.96525400  | 2.55682400  | -4.35064900 |
| H | -2.07842500  | 1.22463000  | -2.29680200 |
| H | -3.96473700  | 1.83699100  | 2.35707700  |
| H | -3.95450200  | 2.98829100  | 4.50823100  |
| H | -0.31766700  | 4.98288700  | 3.43461900  |
| H | -0.32808300  | 3.85656700  | 1.27905900  |
| H | 0.32804900   | -3.85662300 | 1.27883300  |
| H | 0.31760800   | -4.98309800 | 3.43430800  |
| H | 3.95446700   | -2.98863300 | 4.50808100  |
| H | 3.96472800   | -1.83717500 | 2.35701000  |
| H | -1.94134200  | 6.34012200  | -4.40236400 |
| H | -0.86547400  | 5.12247100  | -5.09902500 |
| H | -2.60664000  | 4.98017900  | -5.32116100 |
| H | -2.33659900  | 5.86829800  | 5.33295900  |
| H | -2.89631700  | 4.39718300  | 6.13738900  |
| H | -1.16293400  | 4.71201800  | 5.95580600  |
| H | 2.33530700   | -5.86881100 | 5.33257900  |
| H | 2.89691600   | -4.39827800 | 6.13678300  |
| H | 1.16313500   | -4.71135300 | 5.95603800  |
| H | -4.59797000  | 3.88549400  | -1.75963600 |
| H | -6.40412500  | 3.69077500  | -3.41739500 |
| H | -6.24052300  | 2.17203800  | -2.53109900 |
| H | -7.57585000  | 3.27787300  | -2.16285900 |
| H | 4.59800900   | -3.88539800 | -1.75978800 |
| H | 6.40420600   | -3.69063500 | -3.41749900 |
| H | 6.24059700   | -2.17193200 | -2.53114700 |
| H | 7.57590500   | -3.27779300 | -2.16292000 |
| H | 1.94142100   | -6.33986400 | -4.40270500 |
| H | 0.86556100   | -5.12217500 | -5.09931300 |
| H | 2.60673100   | -4.97986800 | -5.32141400 |
| H | 2.06598900   | -4.82637600 | 0.03732100  |
| H | 1.91847000   | -6.14984300 | -2.01558700 |
| H | 1.96534900   | -2.55657100 | -4.35077500 |
| H | 2.07848600   | -1.22449200 | -2.29685000 |
| H | 10.73795400  | -1.33779400 | 0.01021900  |
| H | -10.73795000 | 1.33780100  | 0.01017600  |
| H | -15.74205300 | -1.22404100 | -0.00637800 |
| H | -12.23671400 | -4.79817700 | -0.07547900 |
| H | -5.17374500  | 9.71679100  | 0.41514000  |
| H | -4.98647400  | 8.35294100  | 1.52469200  |
| H | -3.78537600  | 8.63281200  | 0.25931800  |
| H | -5.52837300  | 8.14193100  | -1.49563000 |

|    |              |             |             |
|----|--------------|-------------|-------------|
| H  | -6.72180600  | 7.86667100  | -0.24032700 |
| H  | -5.35454400  | 5.96565500  | 0.63946800  |
| H  | -4.16712400  | 6.22825000  | -0.62744400 |
| H  | -5.95174200  | 5.84959300  | -2.36546300 |
| H  | -7.10378500  | 5.49632500  | -1.09141200 |
| H  | 5.17364800   | -9.71679400 | 0.41474900  |
| H  | 4.98637800   | -8.35299000 | 1.52435800  |
| H  | 3.78530000   | -8.63278500 | 0.25894800  |
| H  | 5.52834200   | -8.14185800 | -1.49594500 |
| H  | 6.72175200   | -7.86666900 | -0.24060600 |
| H  | 5.35449700   | -5.96567000 | 0.63924200  |
| H  | 4.16710300   | -6.22819300 | -0.62771100 |
| H  | 5.95177100   | -5.84948900 | -2.36567000 |
| H  | 7.10378700   | -5.49629100 | -1.09157400 |
| C1 | -14.75780600 | -5.57961200 | -0.08065100 |
| C1 | -16.57969100 | -3.65096400 | -0.04328300 |
| C1 | 16.57970200  | 3.65096100  | -0.04306900 |
| C1 | 14.75782200  | 5.57961400  | -0.08034900 |
